# Supplementary material for: Visible-light-promoted synthesis of secondary and tertiary thiocarbamates from thiosulfonates and N-substituted formamides
Source: Royal Society of Chemistry journal article supplement (doi:10.1039/d1ob01592c), 2021-01-01
Supplement: d1ob01592c1.pdf [file d1ob01592c1.pdf]

## Supplementary Information

### Visible-light-promoted synthesis of secondary and tertiary thiocarbamates from thiosulfonates and *N*-substituted formamides

Wen-Zhu Bi,<sup>\*a</sup> Wen-Jie Zhang,<sup>a</sup> Zi-Jie Li,<sup>a</sup> Yuan-Hao He,<sup>a</sup> Su-Xiang Feng,<sup>\*b,c</sup> Yang Geng,<sup>\*d</sup>

Xiao-Lan Chen,<sup>e</sup> and Ling-Bo Qu<sup>e</sup>

<sup>a</sup> School of Pharmacy, Henan University of Chinese Medicine, Zhengzhou, 450046, China

<sup>b</sup> Scientific Research Center, Henan University of Chinese Medicine, Zhengzhou, 450046, China

<sup>c</sup> Co-construction Collaborative Innovation Center for Chinese Medicine and Respiratory Disease Diagnosis by Henan and Education Ministry of P. R. China, Zhengzhou, 450046, China

<sup>d</sup> Department of Pharmacy, Zhengzhou Railway Vocational and Technical College, Zhengzhou, 450046, China

<sup>e</sup> College of Chemistry, Zhengzhou University, Zhengzhou, 450052, China

Corresponding E-mail: [biwenzhu2018@hactcm.edu.cn](mailto:biwenzhu2018@hactcm.edu.cn)

### Table of Contents

|                                                                  |     |
|------------------------------------------------------------------|-----|
| 1. General information.....                                      | S2  |
| 2. General procedure for the synthesis of thiosulfonates.....    | S2  |
| 3. General procedure for the synthesis of products 3 and 5 ..... | S3  |
| 4. Mechanism Study.....                                          | S3  |
| 5. Characterization data of compounds 3a-h, 3j-r and 5a-j .....  | S8  |
| 6. NMR and HRMS copies of compounds 3a-h, 3j-r and 5a-j.....     | S15 |

## 1. General information

All reagents and solvents were purchased from commercial suppliers without further purification. All reactions were studied in borosilicate glass vessels irradiated by 5 W blue LED light from a photo reactor manufactured by Beijing Roger Technology Co., Ltd. without using filters with magnetic stirring apparatus. The progress of the reactions were monitored by thin-layer chromatography under 254 nm UV light.  $^1\text{H}$  NMR and  $^{13}\text{C}$  NMR spectra were recorded at Bruker Avance 400 MHz spectrometer operating at 400.13 MHz and 100.61 MHz, respectively. NMR spectra were recorded in  $\text{CDCl}_3$  at room temperature ( $20 \pm 2$  °C). High-resolution mass spectra (HRMS) of the products were obtained on a Thermo TNG Orbitrap Fusion using the ESI technique and Agilent Technologies 6530 Accuratmass Q-TOF LC/MS with ESI as ion source. Melting points were determined on a Mel-Temp melting point apparatus and were uncorrected. Fluorescence quenching experiments were performed by Hitachi F7000 fluorescence spectrometer.

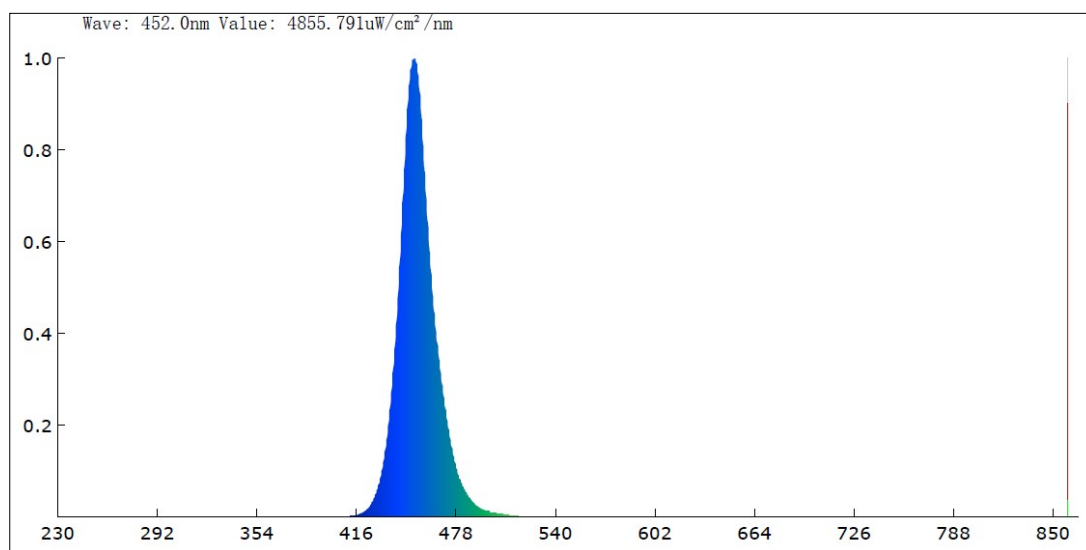

**Figure S1** The emission spectrum of blue LEDs ( $\lambda_{\text{max}} = 452.0$  nm)

## 2. General procedure for the synthesis of thiosulfonates

Disulfides (0.5 mmol, 1.0 equiv.), sodium benzenesulfonates (12 mmol, 2.4 equiv.), iodine (7.5 mmol, 1.5 equiv.) were mixed in  $\text{CH}_2\text{Cl}_2$  (20 mL) in a 250 mL round bottom flask. The mixture was stirred at room temperature for 10 h. After completion of the reaction, sodium thiosulfate was added to the above mixture to remove the excess iodine. Then, the mixture was extracted with brine (20 mL  $\times$  3). The organic phase were combined and dried over anhydrous  $\text{Na}_2\text{SO}_4$ . After filtration, the solvent

ra was evaporated and the crude product was purified by silica gel (petroleum ether : ethyl acetate = 10 : 1, v/v) to give the desired products.

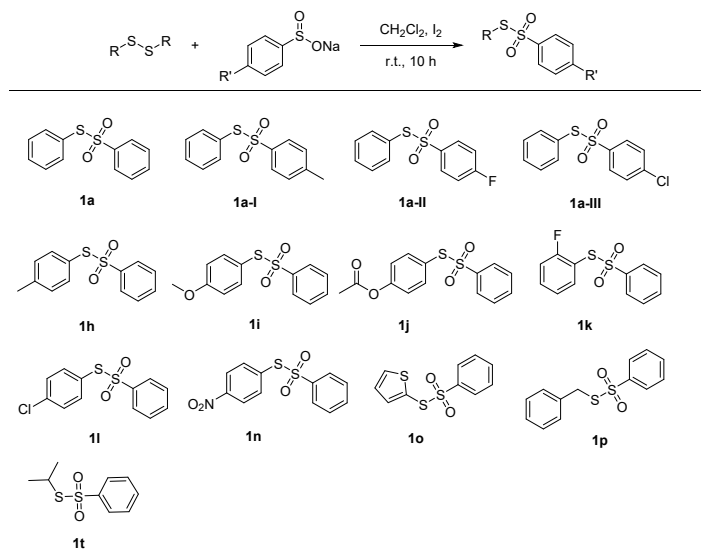

### 3. General procedure for the synthesis of products 3 and 5

Thiosulfonates (0.4 mmol), TBHP (0.4 mmol, 70% aqueous solution), rhodamine B (2.5 mol%) were dissolved in corresponding formamides (2.0 mL) in a 25 mL reaction tube, and then the mixture was stirred with the irradiation of 5 W blue LED under N<sub>2</sub> at room temperature for 12 h. After reaction, the mixture was diluted with brine and extracted with petroleum ether (15 mL × 3). The organic layers were collected and dried over anhydrous Na<sub>2</sub>SO<sub>4</sub>. The residue was purified by silica gel column chromatography to afford the desired products.

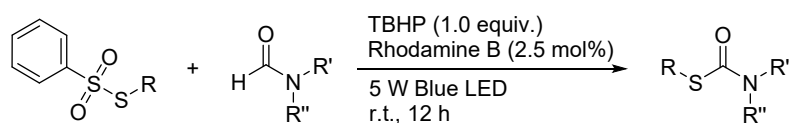

## 4. Mechanism Study

### 4.1 Experiment interfered with radical scavenger

In a 25 mL reaction tube, *S*-phenyl benzenethiosulfonate (0.4 mmol), TBHP (0.4 mmol, 70% aqueous solution), rhodamine B (2.5 mol%) and 2.0 equiv. of (2,2,6,6-tetramethylpiperidin-1-yl)oxidanyl (TEMPO) or 2,6-di-tert-butyl-4-methylphenol (BHT) were dissolved in DMF (2.0 mL), respectively. The mixtures were stirred under standard reaction conditions for 12 h and then detected by HRMS.

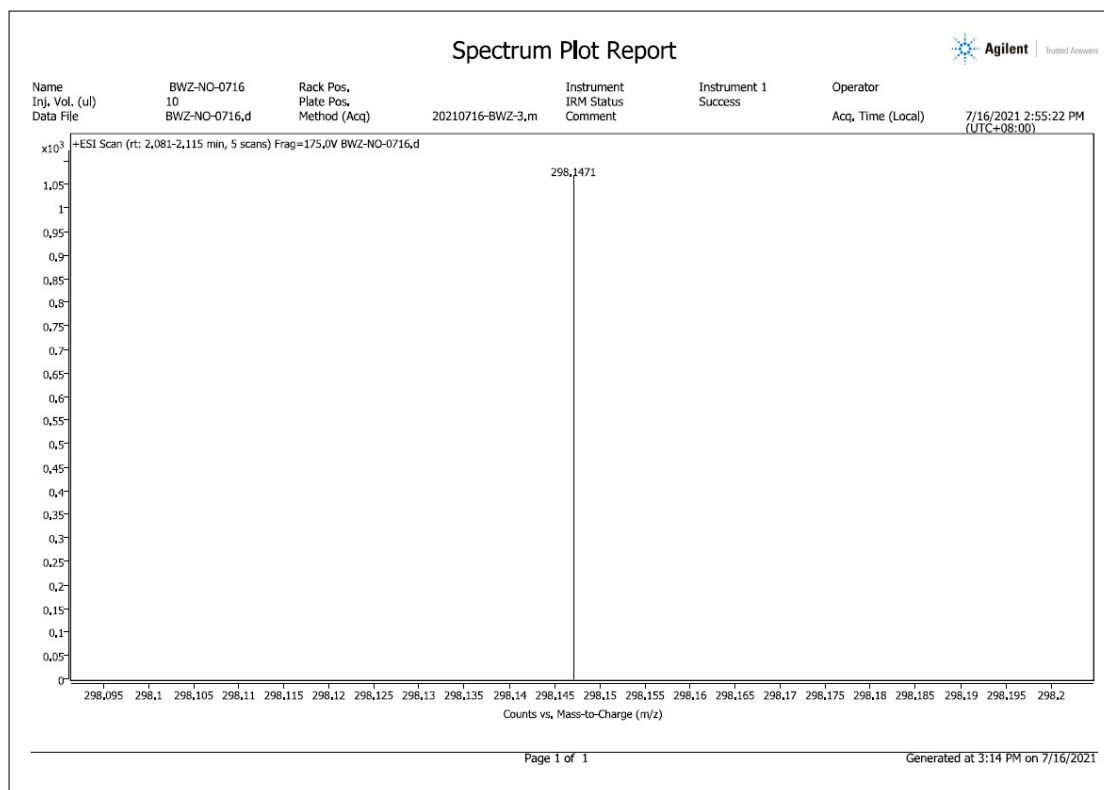

**Figure S2** HRMS spectrum of the benzenesulfonyl radical/TEMPO adduct **7**

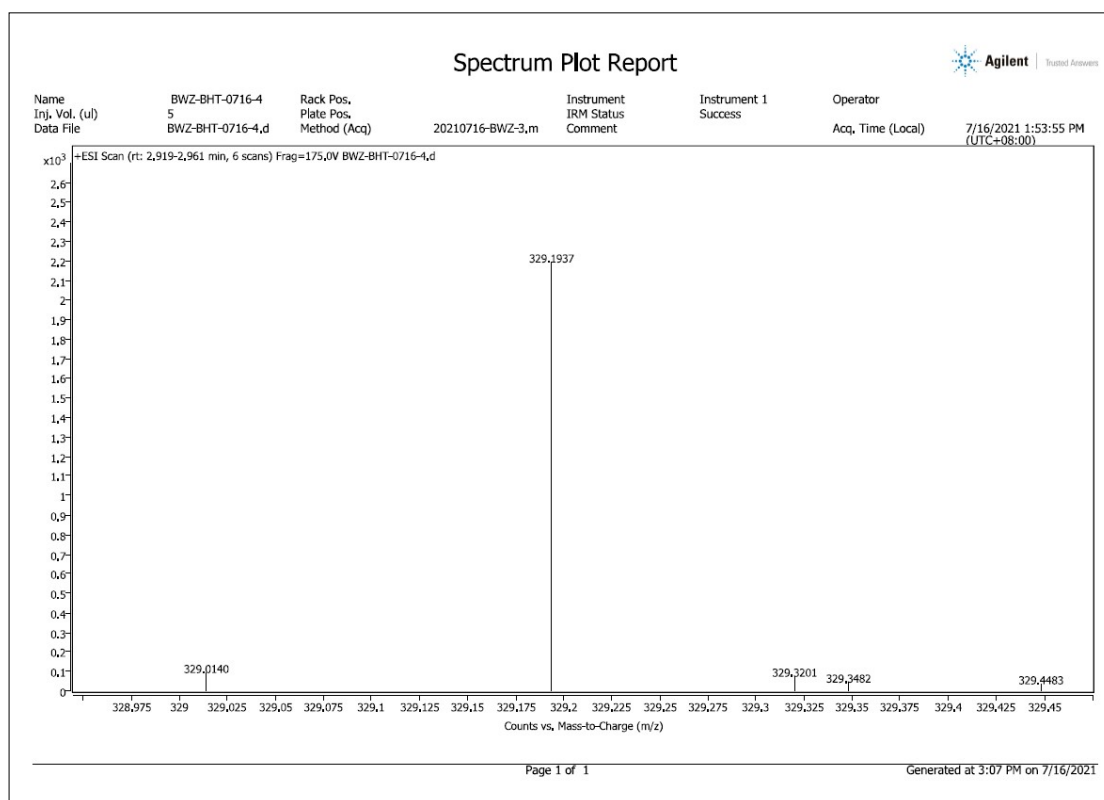

**Figure S3** HRMS Spectrum of the benzenesulfonyl radical/BHT adduct **8**

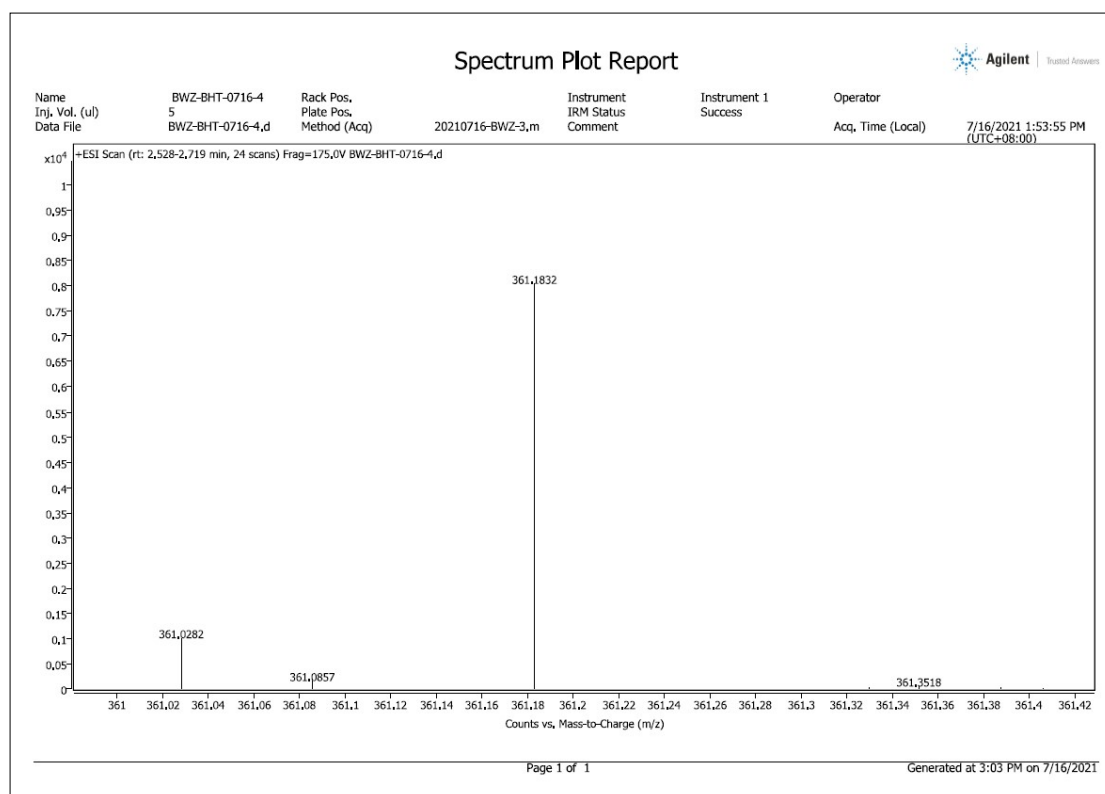

**Figure S4** HRMS spectrum of the benzenesulfonyl radical/BHT adduct **9**

## 4.2 Fluorescence quenching experiments

A stock solution of RhB (rhodamine B) (5 mM in dry DMF) was prepared for the quenching experiment. 20  $\mu$ L RhB stock solution was added in 2.0 mL of DMF in a quartz cuvette (1 cm  $\times$  1 cm). The fluorescence excitation and emission spectra were firstly recorded as shown below. The maximum excitation/emission wavelength were detected as 325/566 nm. Then, quenching experiments were performed with addition of TBHP (5 mM in DMF) or **1a** (0, 1, 2, 3, 4, 5 mM in DMF) by a HPLC needle, respectively.

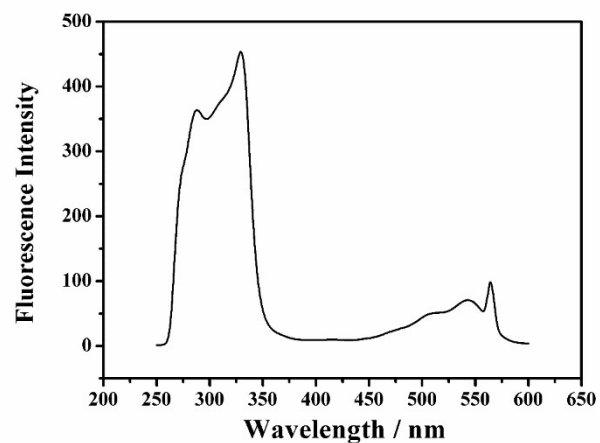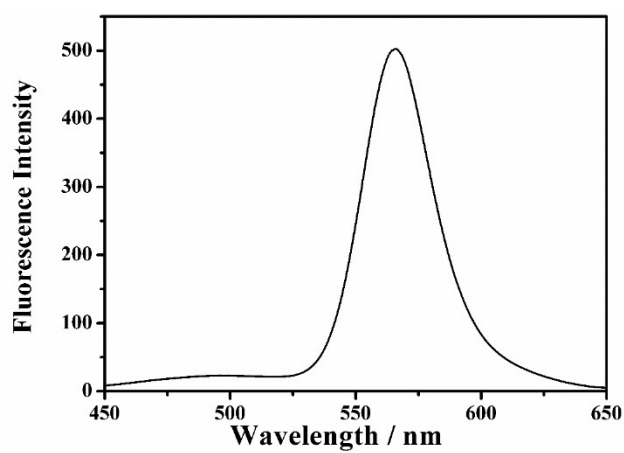

**Figure S5** Fluorescence excitation (up) and emission (down) spectra of RhB ( $5 \times 10^{-4}$  M) in DMF

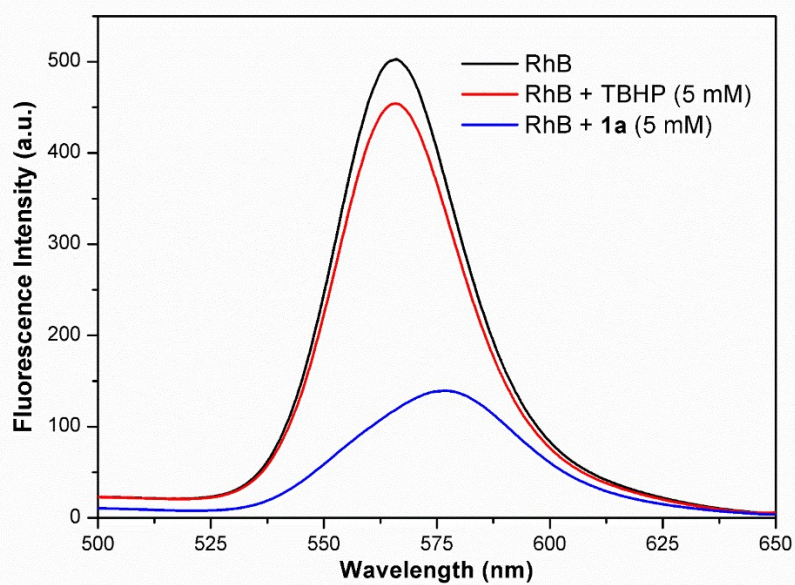

**Figure S6** Fluorescence emission spectra of RhB ( $5 \times 10^{-4}$  M) in DMF with TBHP or **1a** (5 mM)

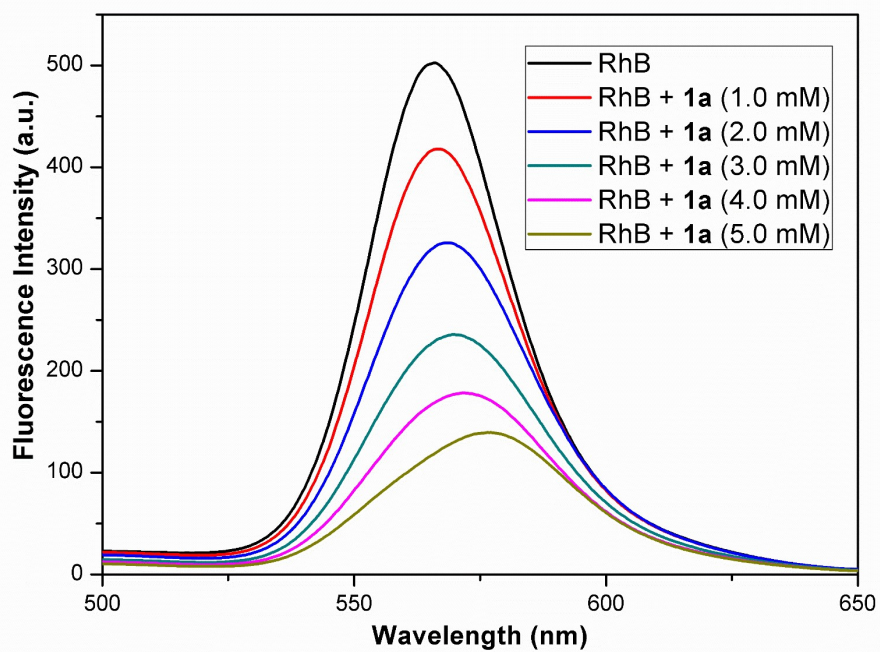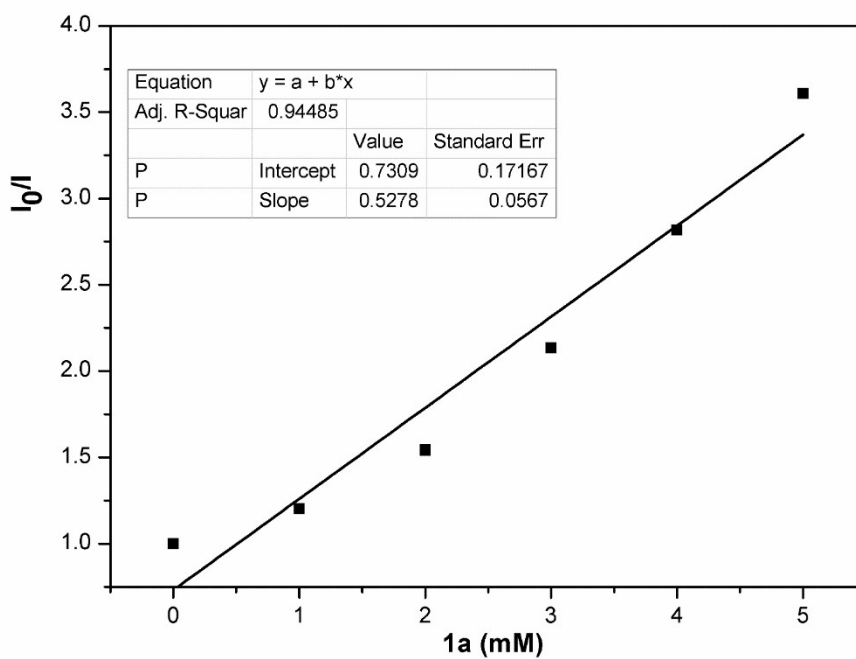

**Figure S7** Fluorescence emission spectra of RhB in DMF with **1a** (up) and the linear relationship between  $I_0/I$  and the concentration of **1a** (down)

## 5. Characterization data of compounds 3a-h, 3j-r and 5a-j

### S-phenyl dimethylcarbamothioate (**3a**)

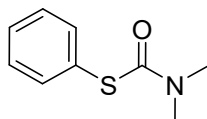

Colourless oil, yield: 80%.

$^1\text{H NMR}$  ( $\text{CDCl}_3$ , 400 MHz):  $\delta$  (ppm) 7.51-7.48 (m, 2H, Ar-H), 7.40-7.37 (m, 3H, Ar-H), 3.09 (s, 3H,  $\text{CH}_3$ ), 3.03 (s, 3H,  $\text{CH}_3$ ).

$^{13}\text{C NMR}$  ( $\text{CDCl}_3$ , 100 MHz):  $\delta$  (ppm) 166.9, 135.7, 129.1, 128.9, 128.8, 36.9.

HRMS:  $\text{C}_9\text{H}_{12}\text{NOS}$  [ $\text{M} + \text{H}$ ] $^+$  182.0634, found 182.0633.

### S-phenyl diethylcarbamothioate (**3b**)

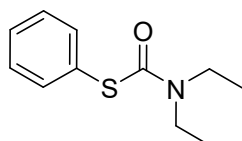

Colourless oil, yield: 75%.

$^1\text{H NMR}$  ( $\text{CDCl}_3$ , 400 MHz):  $\delta$  (ppm) 7.52-7.50 (m, 2H, Ar-H), 7.39-7.37 (m, 3H, Ar-H), 3.46-3.41 (m, 4H,  $(\text{CH}_2)_2$ ), 1.26-1.17 (m, 6H,  $(\text{CH}_3)_2$ ).

$^{13}\text{C NMR}$  ( $\text{CDCl}_3$ , 100 MHz):  $\delta$  (ppm) 165.7, 135.8, 129.6, 129.0, 128.9, 42.4, 13.2.

HRMS:  $\text{C}_{11}\text{H}_{16}\text{NOS}$  [ $\text{M} + \text{H}$ ] $^+$  210.0947, found 210.0946.

### S-phenyl dipropylcarbamothioate (**3c**)

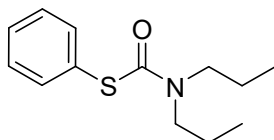

Colourless oil, yield: 74%.

$^1\text{H NMR}$  ( $\text{CDCl}_3$ , 400 MHz):  $\delta$  (ppm) 7.50-7.49 (m, 2H, Ar-H), 7.38-7.36 (m, 3H, Ar-H), 3.34-3.30 (m, 4H,  $\text{N}(\text{CH}_2)_2$ ), 1.72-1.56 (m, 4H,  $(\text{CH}_2)_2$ ), 0.98-0.88 (m, 6H,  $(\text{CH}_3)_2$ ).

$^{13}\text{C NMR}$  ( $\text{CDCl}_3$ , 100 MHz):  $\delta$  (ppm) 166.3, 135.7, 129.0, 128.84, 128.80, 49.7, 21.8, 11.3.

HRMS:  $\text{C}_{13}\text{H}_{20}\text{NOS}$  [ $\text{M} + \text{H}$ ] $^+$  238.1260, found 238.1260.

### S-phenyl diisopropylcarbamothioate (**3d**)

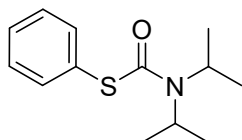

White solid, yield: 73%, M.p.: 100-102 °C.

$^1\text{H NMR}$  ( $\text{CDCl}_3$ , 400 MHz):  $\delta$  (ppm) 7.51-7.49 (m, 2H, Ar-H), 7.38-7.37 (m, 3H, Ar-H), 4.20 (s, 1H, CH), 3.51 (s, 1H, CH), 1.33 (s, 12H,  $(\text{CH}_3)_4$ ).

$^{13}\text{C NMR}$  ( $\text{CDCl}_3$ , 100 MHz):  $\delta$  (ppm) 164.1, 136.0, 129.3, 128.9, 128.8, 63.2, 20.7.

HRMS:  $\text{C}_{13}\text{H}_{20}\text{NOS}$  [ $\text{M} + \text{H}$ ] $^+$  238.1260, found 238.1261.



*S*-phenyl dibutylcarbamothioate (**3e**)

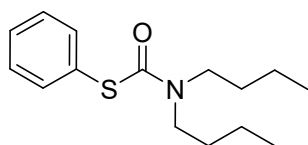

Colourless oil, yield: 65%.

$^1\text{H NMR}$  ( $\text{CDCl}_3$ , 400 MHz):  $\delta$  (ppm) 7.51-7.49 (m, 2H, Ar-H), 7.38-7.36 (m, 3H, Ar-H), 3.37-3.33 (m, 4H, N(CH<sub>2</sub>)<sub>2</sub>), 1.62 (m, 4H, (CH<sub>2</sub>)<sub>2</sub>), 1.39-1.26 (m, 4H, (CH<sub>2</sub>)<sub>2</sub>), 1.00-0.89 (m, 6H, (CH<sub>3</sub>)<sub>2</sub>).

$^{13}\text{C NMR}$  ( $\text{CDCl}_3$ , 100 MHz):  $\delta$  (ppm) 166.1, 135.7, 128.99, 128.96, 128.8, 47.9, 29.9, 20.1, 13.8.

HRMS: C<sub>15</sub>H<sub>24</sub>NOS [M + H]<sup>+</sup> 266.1573, found 266.1572.

*S*-phenyl morpholine-4-carbothioate (**3f**)

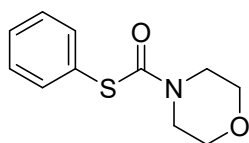

White solid, yield: 68%, M.p.: 105-107 °C.

$^1\text{H NMR}$  ( $\text{CDCl}_3$ , 400 MHz):  $\delta$  (ppm) 7.51-7.49 (m, 2H, Ar-H), 7.41-7.39 (m, 3H, Ar-H), 3.74-3.72 (m, 4H, (CH<sub>2</sub>)<sub>2</sub>), 3.62-3.60 (m, 4H, (CH<sub>2</sub>)<sub>2</sub>).

$^{13}\text{C NMR}$  ( $\text{CDCl}_3$ , 100 MHz):  $\delta$  (ppm) 166.4, 135.8, 129.4, 129.0, 128.0, 66.5, 45.3.

HRMS: C<sub>11</sub>H<sub>14</sub>NO<sub>2</sub>S [M + H]<sup>+</sup> 224.0740, found 224.0740.

*S*-phenyl piperidine-1-carbothioate (**3g**)

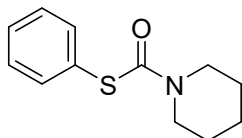

White solid, yield: 78%, M.p.: 58-60 °C.

$^1\text{H NMR}$  ( $\text{CDCl}_3$ , 400 MHz):  $\delta$  (ppm) 7.51-7.49 (m, 2H, Ar-H), 7.39-7.36 (m, 3H, Ar-H), 3.53 (s, 4H, (CH<sub>2</sub>)<sub>2</sub>), 1.63 (m, 6H, (CH<sub>2</sub>)<sub>3</sub>).

$^{13}\text{C NMR}$  ( $\text{CDCl}_3$ , 100 MHz):  $\delta$  (ppm) 165.4, 135.8, 129.1, 128.9, 46.8, 45.5, 25.8, 24.5.

HRMS: C<sub>12</sub>H<sub>16</sub>NOS [M + H]<sup>+</sup> 222.0947, found 222.0947.

*S*-*p*-tolyl dimethylcarbamothioate (**3h**)

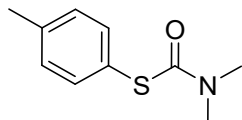

Colourless oil, yield: 53%.

$^1\text{H NMR}$  ( $\text{CDCl}_3$ , 400 MHz):  $\delta$  (ppm) 7.37 (d,  $J$  = 8.0 Hz, 2H, Ar-H), 7.19 (d,  $J$  = 8.0 Hz, 2H, Ar-H), 3.06-3.02 (m, 6H, (CH<sub>3</sub>)<sub>2</sub>), 2.36 (s, 3H, CH<sub>3</sub>).

$^{13}\text{C NMR}$  ( $\text{CDCl}_3$ , 100 MHz):  $\delta$  (ppm) 167.3, 139.4, 135.7, 129.8, 125.3, 36.9, 21.3.

HRMS: C<sub>10</sub>H<sub>14</sub>NOS [M + H]<sup>+</sup> 196.0791, found 196.0790.

*S*-4-(dimethylcarbamoylthio)phenyl acetate (**3j**)

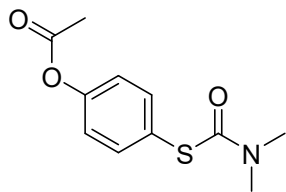

White solid, yield: 75%, M.p.: 71.2-73.6 °C.

<sup>1</sup>H NMR (CDCl<sub>3</sub>, 400 MHz): δ (ppm) 7.49 (d, *J* = 8.0 Hz, 2H, Ar-H), 7.12 (d, *J* = 8.0 Hz, 2H, Ar-H), 3.06 (s, 6H, N(CH<sub>3</sub>)<sub>2</sub>), 2.30 (s, 3H, CH<sub>3</sub>).

<sup>13</sup>C NMR (CDCl<sub>3</sub>, 100 MHz): δ (ppm) 169.0, 166.6, 151.5, 136.8, 126.0, 122.1, 36.9, 21.1.

HRMS: C<sub>11</sub>H<sub>14</sub>NO<sub>3</sub>S [M + H]<sup>+</sup> 240.0689, found 240.0685.

S-2-fluorophenyl dimethylcarbamothioate (**3k**)

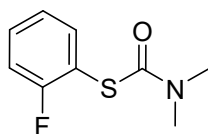

Colourless oil, yield: 77%.

<sup>1</sup>H NMR (CDCl<sub>3</sub>, 400 MHz): δ (ppm) 7.51-7.46 (m, 1H, Ar-H), 7.42-7.40 (s, 1H, Ar-H), 7.18-7.13 (m, 2H, Ar-H), 3.13 (s, 3H, CH<sub>3</sub>), 3.03 (s, 3H, CH<sub>3</sub>).

<sup>13</sup>C NMR (CDCl<sub>3</sub>, 100 MHz): δ (ppm) 165.1, 164.2, 137.8, 131.9 (d, *J* = 8.2 Hz), 124.4 (d, *J* = 3.8 Hz), 116.2, 115.9, 37.0.

HRMS: C<sub>9</sub>H<sub>11</sub>FNOS [M + H]<sup>+</sup> 200.0540, found 200.0540.

S-4-chlorophenyl dimethylcarbamothioate (**3l**)

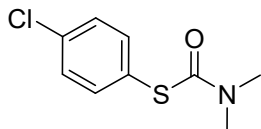

Colourless oil, yield: 83%.

<sup>1</sup>H NMR (CDCl<sub>3</sub>, 400 MHz): δ (ppm) 7.41 (d, *J* = 8.4 Hz, 2H, Ar-H), 7.34 (d, *J* = 8.4 Hz, 2H, Ar-H), 3.07 (s, 3H, CH<sub>3</sub>), 3.02 (s, 3H, CH<sub>3</sub>).

<sup>13</sup>C NMR (CDCl<sub>3</sub>, 100 MHz): δ (ppm) 166.3, 136.9, 135.6, 129.1, 127.4, 36.9.

HRMS: C<sub>9</sub>H<sub>11</sub>ClNOS [M + H]<sup>+</sup> 216.0244, found 216.0241.

S-4-chlorophenyl diethylcarbamothioate (**3m**)

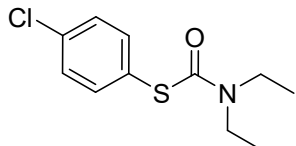

Colourless oil, yield: 81%.

<sup>1</sup>H NMR (CDCl<sub>3</sub>, 400 MHz): δ (ppm) 7.43 (d, *J* = 8.4 Hz, 2H, Ar-H), 7.34 (d, *J* = 8.4 Hz, 2H, Ar-H), 3.45-3.40 (s, 4H, (CH<sub>2</sub>)<sub>2</sub>), 1.22 (m, 6H, (CH<sub>3</sub>)<sub>2</sub>).

<sup>13</sup>C NMR (CDCl<sub>3</sub>, 100 MHz): δ (ppm) 165.1, 136.9, 135.4, 129.1, 127.4, 42.4, 13.8, 13.2.

HRMS: C<sub>11</sub>H<sub>15</sub>ClNOS [M + H]<sup>+</sup> 244.0557, found 244.0551.

S-4-nitrophenyl dimethylcarbamothioate (**3n**)

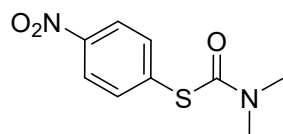

Yellow oil, yield: 68%.

<sup>1</sup>H NMR (CDCl<sub>3</sub>, 400 MHz): δ (ppm) 8.22 (d, *J* = 8.8 Hz, 2H, Ar-H), 7.68 (d, *J* = 9.2 Hz, 2H, Ar-H), 3.12 (s, 3H, CH<sub>3</sub>), 3.06 (s, 3H, CH<sub>3</sub>).

<sup>13</sup>C NMR (CDCl<sub>3</sub>, 100 MHz): δ (ppm) 164.5, 148.0, 137.6, 135.8, 123.5, 37.1.

HRMS: C<sub>9</sub>H<sub>10</sub>N<sub>2</sub>NaO<sub>3</sub>S [M + Na]<sup>+</sup> 249.0304, found 249.0312.

S-thiophen-2-yl dimethylcarbamothioate (**3o**)

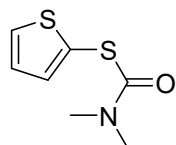

Colourless oil, yield: 57%.

<sup>1</sup>H NMR (CDCl<sub>3</sub>, 400 MHz): δ (ppm) 7.53 (d, *J* = 5.2 Hz, 1H, Ar-H), 7.20 (d, *J* = 3.2 Hz, 1H, Ar-H), 7.08-7.06 (m, 1H, Ar-H), 3.08 (s, 3H, CH<sub>3</sub>), 3.04 (s, 3H, CH<sub>3</sub>).

<sup>13</sup>C NMR (CDCl<sub>3</sub>, 100 MHz): δ (ppm) 166.2, 136.8, 132.1, 127.5, 126.0, 37.1.

HRMS: C<sub>7</sub>H<sub>10</sub>NOS<sub>2</sub> [M + H]<sup>+</sup> 188.0198, found 188.0204.

S-benzyl dimethylcarbamothioate (**3p**)

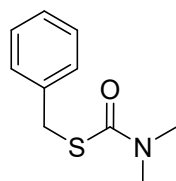

Colourless oil, yield: 66%.

<sup>1</sup>H NMR (CDCl<sub>3</sub>, 400 MHz): δ (ppm) 7.35 (d, *J* = 7.2 Hz, 2H, Ar-H), 7.31-7.27 (m, 2H, Ar-H), 7.24-7.21 (m, 1H, Ar-H), 4.16 (s, 2H, CH<sub>2</sub>), 2.99 (s, 6H, (CH<sub>3</sub>)<sub>2</sub>).

<sup>13</sup>C NMR (CDCl<sub>3</sub>, 100 MHz): δ (ppm) 167.8, 138.4, 128.9, 128.5, 127.1, 36.7, 34.8.

HRMS: C<sub>10</sub>H<sub>14</sub>NOS [M + H]<sup>+</sup> 196.0791, found 196.0796.

S-benzyl diethylcarbamothioate (**3q**)

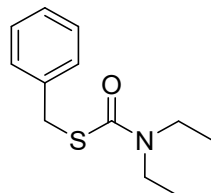

Colourless oil, yield: 62%.

<sup>1</sup>H NMR (CDCl<sub>3</sub>, 400 MHz): δ (ppm) 7.35 (d, *J* = 7.2 Hz, 2H, Ar-H), 7.30 (d, *J* = 7.2 Hz, 2H, Ar-H), 7.26-7.23 (m, 1H, Ar-H), 4.16 (s, 2H, CH<sub>2</sub>), 3.42-3.34 (m, 4H, (CH<sub>2</sub>)<sub>2</sub>), 1.18-1.14 (m, 6H, (CH<sub>3</sub>)<sub>2</sub>).

<sup>13</sup>C NMR (CDCl<sub>3</sub>, 100 MHz): δ (ppm) 166.7, 138.3, 129.0, 128.5, 127.1, 42.1, 34.6, 13.3.

HRMS: C<sub>12</sub>H<sub>13</sub>NOS [M + H]<sup>+</sup> 224.1104, found 224.1103.

*S*-benzyl morpholine-4-carbothioate (**3r**)

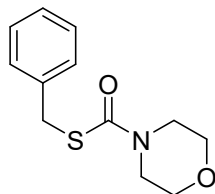

Colourless oil, yield: 55%.

<sup>1</sup>H NMR (CDCl<sub>3</sub>, 400 MHz): δ (ppm) 7.23-7.22 (m, 3H, Ar-H), 7.18-7.17 (m, 2H, Ar-H), 4.27 (s, 2H, CH<sub>2</sub>), 1.56 (s, 2H, CH<sub>2</sub>), 1.26 (s, 2H, CH<sub>2</sub>).

<sup>13</sup>C NMR (CDCl<sub>3</sub>, 100 MHz): δ (ppm) 166.8, 133.5, 129.2, 128.8, 126.9, 53.3, 40.4, 29.6.

HRMS: C<sub>12</sub>H<sub>15</sub>KNO<sub>2</sub>S [M + K]<sup>+</sup> 276.0455, found 276.0440.

*S*-phenyl methylcarbamothioate (**5a**)

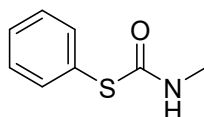

White solid, yield: 75%, M.p.: 138-140 °C.

<sup>1</sup>H NMR (CDCl<sub>3</sub>, 400 MHz): δ (ppm) 7.58-7.56 (m, 2H, Ar-H), 7.43-7.41 (m, 3H, Ar-H), 5.30 (s, 1H, NH), 2.84 (d, *J* = 4.4 Hz, 3H, CH<sub>3</sub>).

<sup>13</sup>C NMR (CDCl<sub>3</sub>, 100 MHz): δ (ppm) 166.8, 135.5, 129.7, 129.5, 128.6, 28.1.

HRMS: C<sub>8</sub>H<sub>10</sub>NOS [M + H]<sup>+</sup> 168.0478, found 168.0484.

*S*-*p*-tolyl methylcarbamothioate (**5b**)

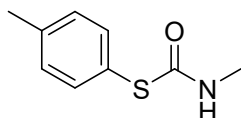

White solid, yield: 60%, M.p.: 79-81 °C.

<sup>1</sup>H NMR (CDCl<sub>3</sub>, 400 MHz): δ (ppm) 7.44 (d, *J* = 7.6 Hz, 2H, Ar-H), 7.21 (d, *J* = 8.0 Hz, 2H, Ar-H), 5.44 (s, 1H, NH), 2.80 (d, *J* = 4.4 Hz, 3H, CH<sub>3</sub>), 2.37 (s, 3H, CH<sub>3</sub>).

<sup>13</sup>C NMR (CDCl<sub>3</sub>, 100 MHz): δ (ppm) 167.3, 140.1, 135.6, 130.4, 125.1, 28.0, 21.3.

HRMS: C<sub>9</sub>H<sub>12</sub>NOS [M + H]<sup>+</sup> 182.0634, found 182.0636.

*S*-2-fluorophenyl methylcarbamothioate (**5c**)

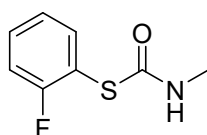

White solid, yield: 78%, M.p.: 95-97 °C.

<sup>1</sup>H NMR (CDCl<sub>3</sub>, 400 MHz): δ (ppm) 7.56-7.52 (m, 1H, Ar-H), 7.44-7.41 (m, 1H, Ar-H), 7.20-7.15 (m, 2H, Ar-H), 5.40 (s, 1H, NH), 2.87 (d, *J* = 4.0 Hz, 3H, CH<sub>3</sub>).

<sup>13</sup>C NMR (CDCl<sub>3</sub>, 100 MHz): δ (ppm) 164.3 (d, *J* = 98.8 Hz), 161.3, 137.6, 132.2 (d, *J* = 8.1 Hz), 124.7 (d, *J* = 3.9 Hz), 116.4, 116.2, 28.2.

HRMS: C<sub>8</sub>H<sub>9</sub>FNOS [M + H]<sup>+</sup> 186.0383, found 186.0392.

*S*-4-chlorophenyl methylcarbamothioate (**5d**)

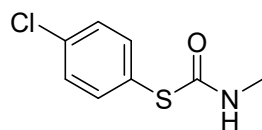

White solid, yield: 82%, M.p.: 121-123 °C.

<sup>1</sup>H NMR (CDCl<sub>3</sub>, 400 MHz): δ (ppm) 7.47 (d, *J* = 8.4 Hz, 2H, Ar-H), 7.37 (d, *J* = 8.4 Hz, 2H, Ar-H), 5.41 (s, 1H, NH), 2.85 (d, *J* = 4.4 Hz, 3H, CH<sub>3</sub>).

<sup>13</sup>C NMR (CDCl<sub>3</sub>, 100 MHz): δ (ppm) 166.0, 136.6, 136.0, 129.6, 127.0, 28.2.

HRMS: C<sub>8</sub>H<sub>9</sub>CINOS [M + H]<sup>+</sup> 202.0088, found 202.0098.

*S*-4-nitrophenyl methylcarbamothioate (**5e**)

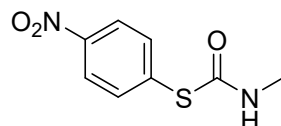

Yellow solid, yield: 76%, M.p.: 126-128 °C.

<sup>1</sup>H NMR (CDCl<sub>3</sub>, 400 MHz): δ (ppm) 8.22 (d, *J* = 8.8 Hz, 2H, Ar-H), 7.70 (d, *J* = 8.4 Hz, 2H, Ar-H), 5.48 (s, 1H, NH), 2.93 (d, *J* = 4.8 Hz, 3H, CH<sub>3</sub>).

<sup>13</sup>C NMR (CDCl<sub>3</sub>, 100 MHz): δ (ppm) 163.8, 147.9, 137.4, 134.7, 123.8, 28.3.

HRMS: C<sub>8</sub>H<sub>9</sub>N<sub>2</sub>O<sub>3</sub>S [M + H]<sup>+</sup> 213.0328, found 213.0340.

*S*-phenyl ethylcarbamothioate (**5f**)

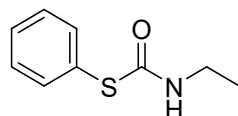

White solid, yield: 73%, M.p.: 80-82 °C.

<sup>1</sup>H NMR (CDCl<sub>3</sub>, 400 MHz): δ (ppm) 7.56-7.54 (m, 2H, Ar-H), 7.41-7.40 (m, 3H, Ar-H), 5.46 (s, 1H, NH), 3.32-3.26 (m, 2H, CH<sub>2</sub>), 1.12-1.08 (m, 3H, CH<sub>3</sub>).

<sup>13</sup>C NMR (CDCl<sub>3</sub>, 100 MHz): δ (ppm) 165.9, 135.5, 129.6, 129.4, 128.7, 36.5, 14.8.

HRMS: C<sub>9</sub>H<sub>12</sub>NOS [M + H]<sup>+</sup> 182.0634, found 182.0634.

*S*-phenyl tert-butylcarbamothioate (**5g**)

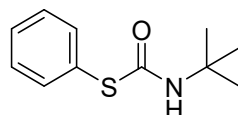

White solid, yield: 70%, M.p.: 110-112 °C.

<sup>1</sup>H NMR (CDCl<sub>3</sub>, 400 MHz): δ (ppm) 7.54-7.52 (m, 2H, Ar-H), 7.39-7.38 (m, 3H, Ar-H), 5.24 (s, 1H, NH), 1.32 (s, 9H, CH<sub>3</sub>).

<sup>13</sup>C NMR (CDCl<sub>3</sub>, 100 MHz): δ (ppm) 164.0, 135.4, 129.3, 129.24, 129.21, 53.5, 28.8.

HRMS: C<sub>11</sub>H<sub>16</sub>NOS [M + H]<sup>+</sup> 210.0947, found 210.0943.

*S*-phenyl cyclohexylcarbamothioate (**5h**)

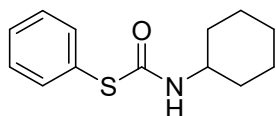

White solid, yield: 64%, M.p.: 107-109 °C.

<sup>1</sup>H NMR (CDCl<sub>3</sub>, 400 MHz): δ (ppm) 7.56-7.54 (m, 2H, Ar-H), 7.42-7.40 (m, 3H, Ar-H), 5.18 (s, 1H, NH), 3.73 (s, 1H, CH), 1.89 (d, *J* = 9.6 Hz, 2H, CH<sub>2</sub>), 1.63-1.56 (m, 2H, CH<sub>2</sub>), 1.34-1.09 (m, 6H, (CH<sub>2</sub>)<sub>3</sub>).

<sup>13</sup>C NMR (CDCl<sub>3</sub>, 100 MHz): δ (ppm) 165.0, 135.7, 135.4, 129.5, 129.4, 50.5, 32.9, 25.4, 24.6.

HRMS: C<sub>13</sub>H<sub>18</sub>NOS [M + H]<sup>+</sup> 236.1104, found 236.1104.

*S*-thiophen-2-yl methylcarbamothioate (**5i**)

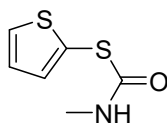

White solid, yield: 53%, M.p.: 119-121 °C.

<sup>1</sup>H NMR (CDCl<sub>3</sub>, 400 MHz): δ (ppm) 7.58 (d, *J* = 5.6 Hz, 1H, Ar-H), 7.30 (d, *J* = 2.8 Hz, 1H, Ar-H), 7.13-7.11 (m, 1H, Ar-H), 5.42 (s, 1H, NH), 2.84 (d, *J* = 4.4 Hz, 3H, CH<sub>3</sub>).

<sup>13</sup>C NMR (CDCl<sub>3</sub>, 100 MHz): δ (ppm) 166.4, 137.6, 133.1, 128.4, 126.4, 28.2.

HRMS: C<sub>6</sub>H<sub>8</sub>NOS<sub>2</sub> [M + H]<sup>+</sup> 174.0042, found 174.0046.

*S*-benzyl methylcarbamothioate (**5j**)

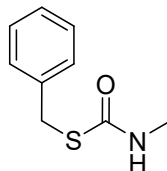

White solid, yield: 54%, M.p.: 35-37 °C.

<sup>1</sup>H NMR (CDCl<sub>3</sub>, 400 MHz): δ (ppm) 7.34-7.29 (m, 3H, Ar-H), 7.25-7.23 (m, 2H, Ar-H), 5.36 (s, 1H, NH), 4.16 (s, 2H, CH<sub>2</sub>), 2.87 (d, *J* = 4.8 Hz, 3H, CH<sub>3</sub>).

<sup>13</sup>C NMR (CDCl<sub>3</sub>, 100 MHz): δ (ppm) 167.4, 138.4, 128.8, 128.6, 127.2, 34.2, 28.0.

HRMS: C<sub>9</sub>H<sub>12</sub>NOS [M + H]<sup>+</sup> 182.0634, found 182.0640.

## 6. $^1\text{H}$ NMR, $^{13}\text{C}$ NMR and HRMS copies of compounds 3a-h, 3j-r and 5a-j

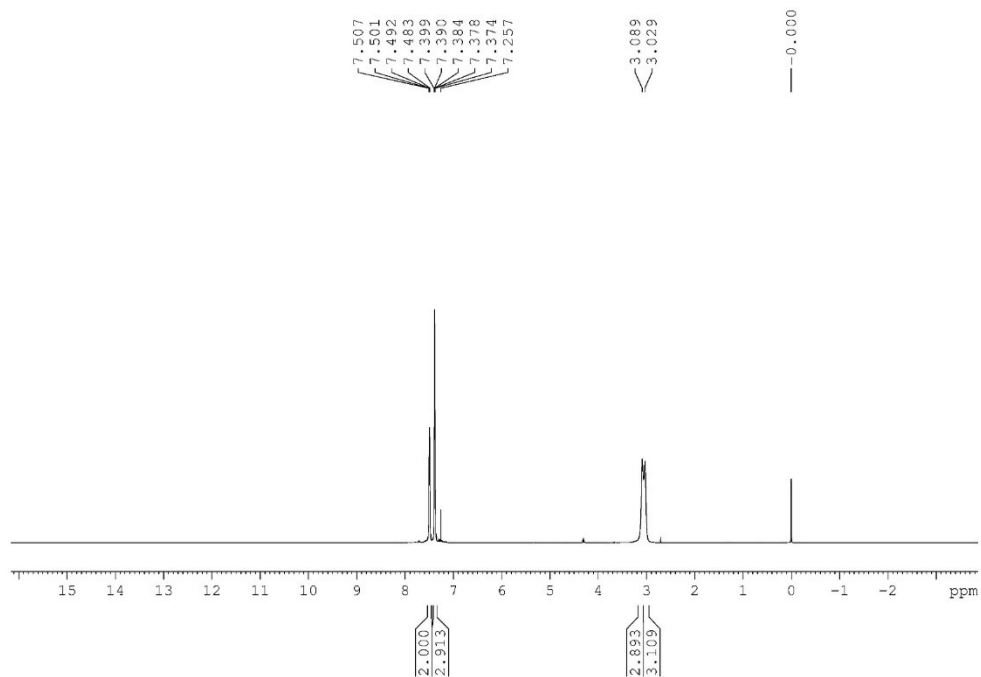

$^1\text{H}$  NMR spectrum of compound **3a**

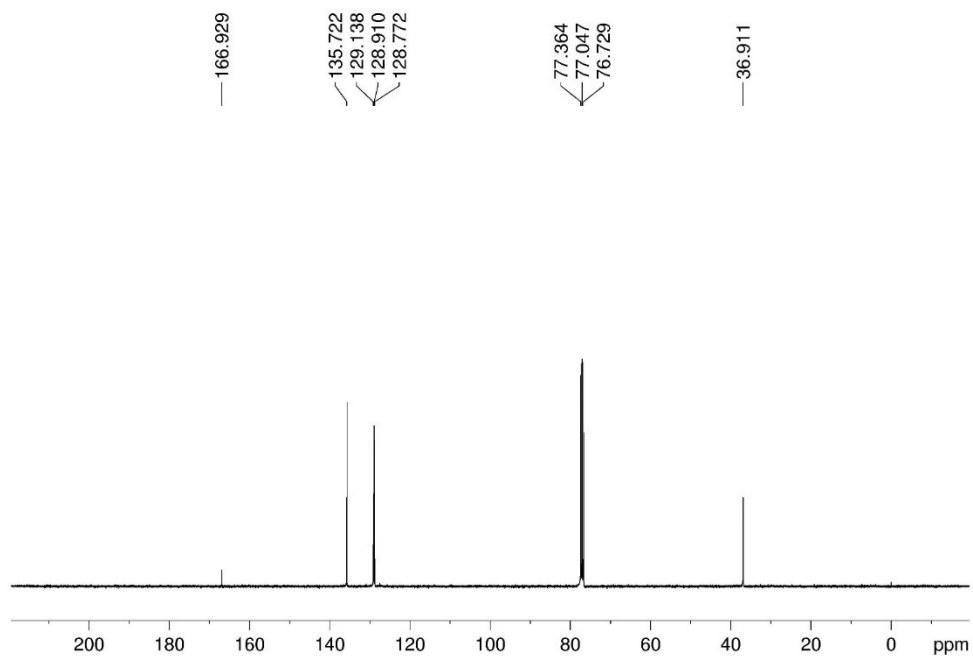

$^{13}\text{C}$  NMR spectrum of compound **3a**

Rawdata\_20210401115906 #42 RT: 0.29 AV: 1 NL: 3.18E6  
T: FTMS + p ESI Full ms [100.0000-1000.0000]

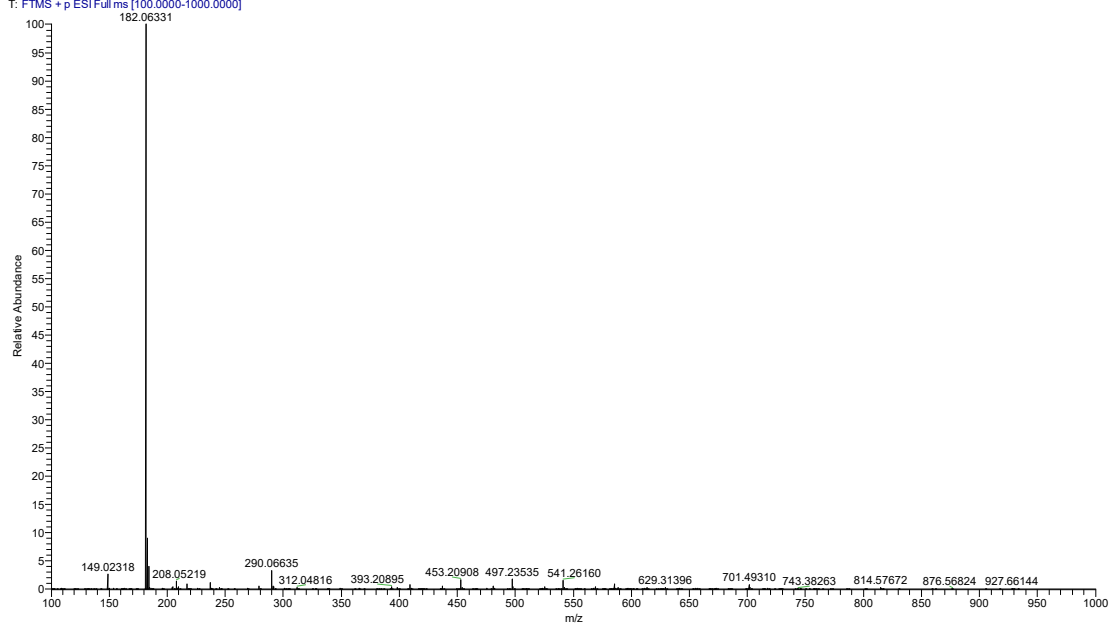

HRMS spectrum of compound 3a

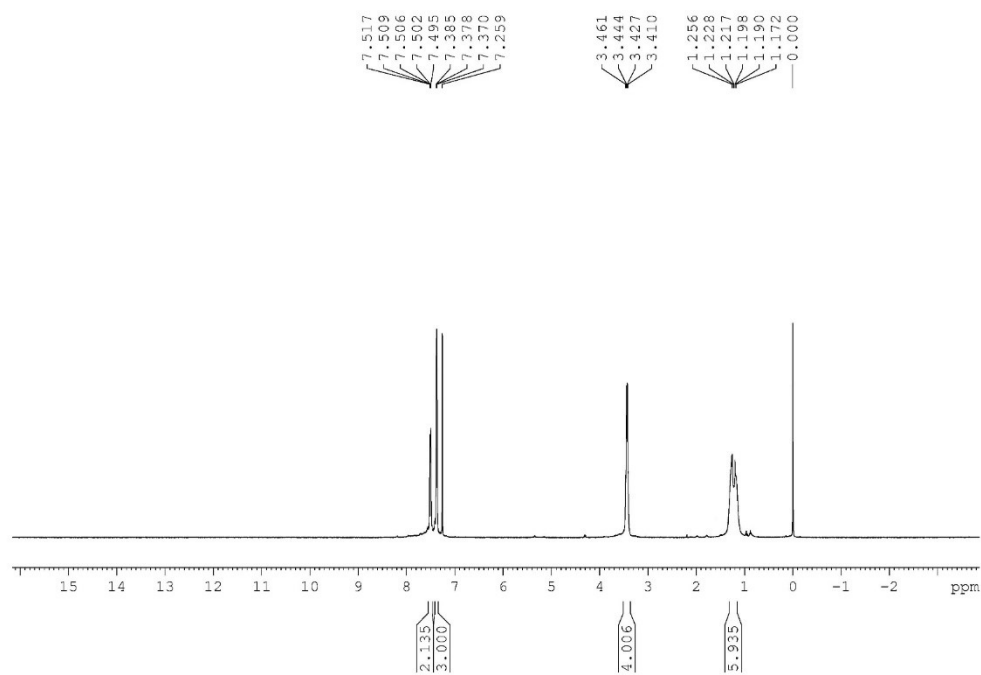

<sup>1</sup>H NMR spectrum of compound 3b



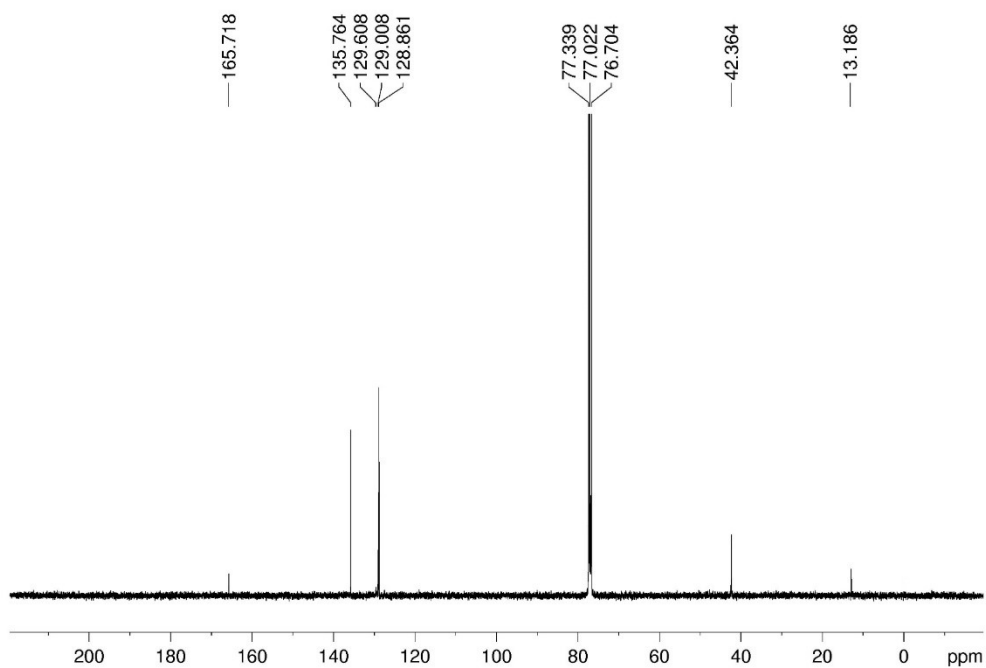

$^{13}\text{C}$  NMR spectrum of compound **3b**

### Spectrum Plot Report

Agilent | Bristol, Arkansas

| Name           | BWZ-2   | Rack Pos.    | Instrument                 | Instrument 1 | Operator                         |
|----------------|---------|--------------|----------------------------|--------------|----------------------------------|
| Inj. Vol. (ul) | 5       | Plate Pos.   | IRM Status                 | Success      |                                  |
| Data File      | BWZ-2.d | Method (Acq) | BWZ20210707-0.1%tAc-4min.m |              | Acq. Time (Local)                |
|                |         |              |                            |              | 7/7/2021 12:58:27 PM (UTC+08:00) |

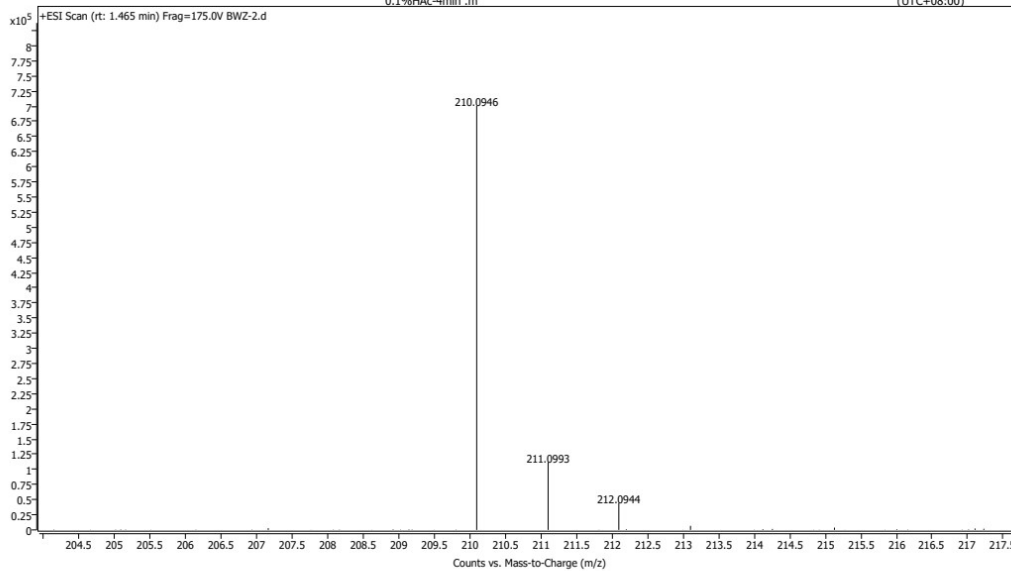

HRMS spectrum of compound **3b**

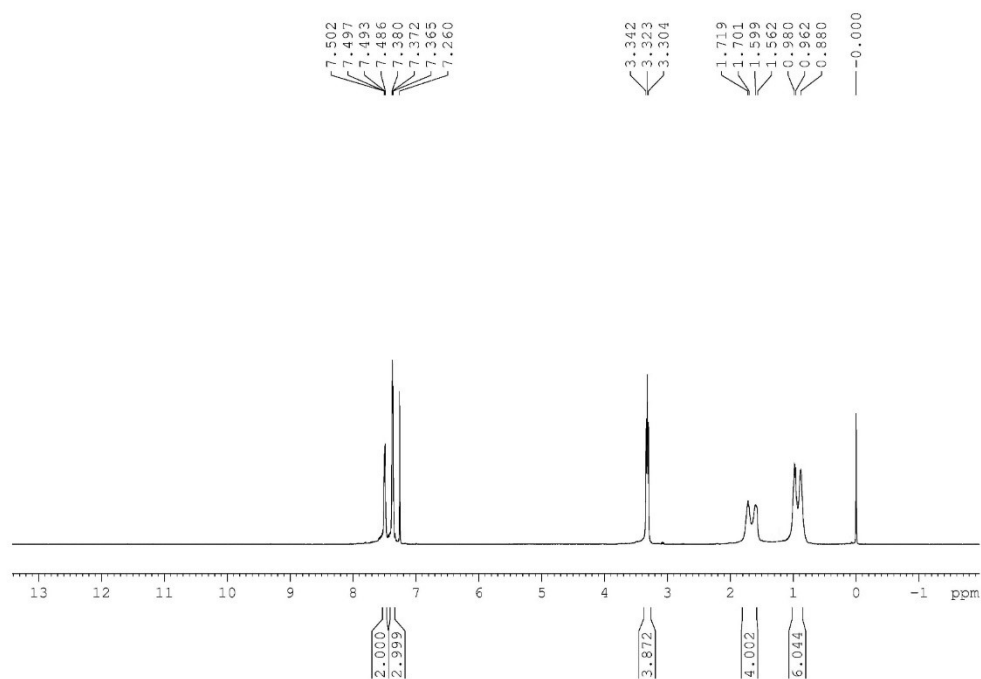

$^1\text{H}$  NMR spectrum of compound **3c**

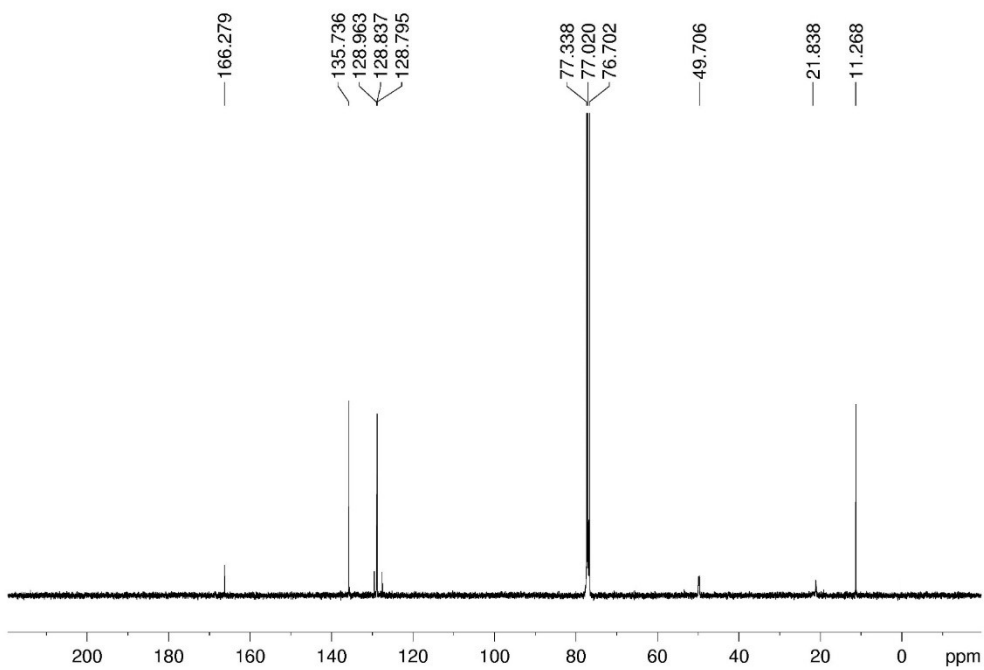

$^{13}\text{C}$  NMR spectrum of compound **3c**

# Spectrum Plot Report

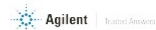

Name: BWZ-3-1  
Inj. Vol. (ul): 5  
Data File: BWZ-3-1.d  
Rack Pos.:  
Plate Pos.:  
Method (Acq): BWZ20210707-0.1%*n*Ac-4min.m  
Instrument: Instrument 1  
IRM Status: Success  
Comment:  
Operator: Operator  
Acq. Time (Local): 7/7/2021 1:27:14 PM (UTC+08:00)

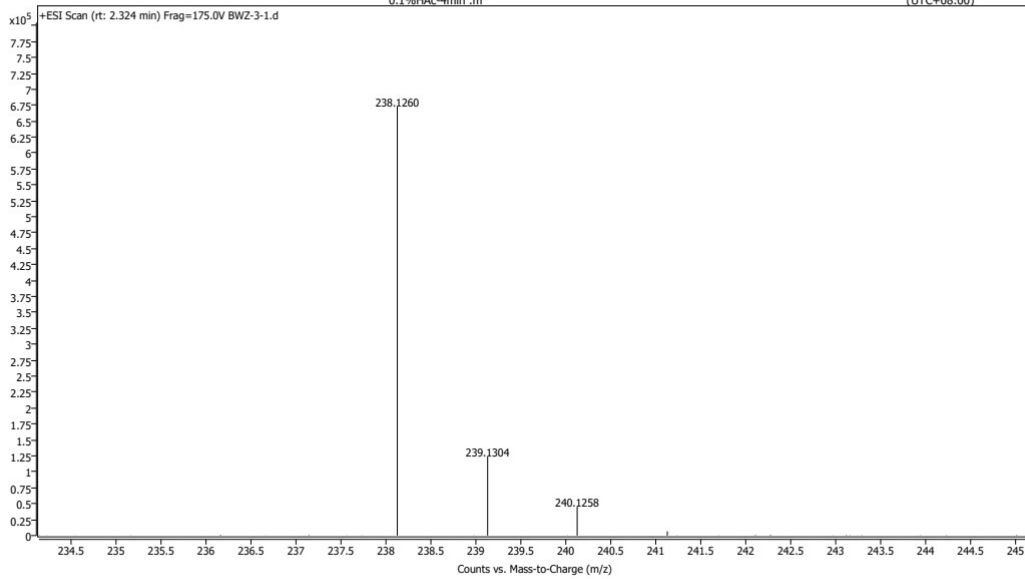

## HRMS spectrum of compound 3c

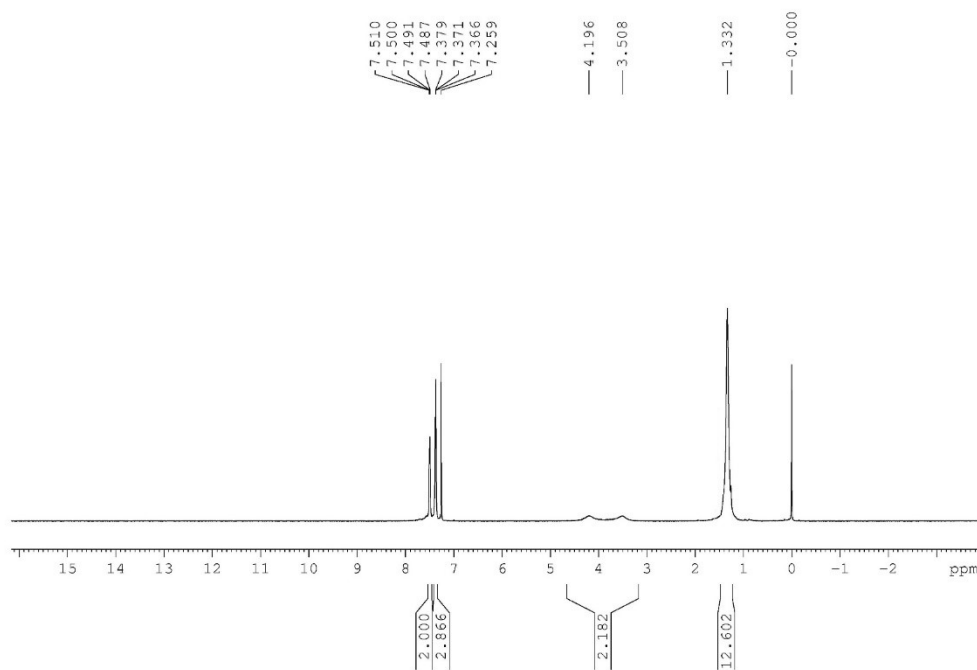

## <sup>1</sup>H NMR spectrum of compound 3d

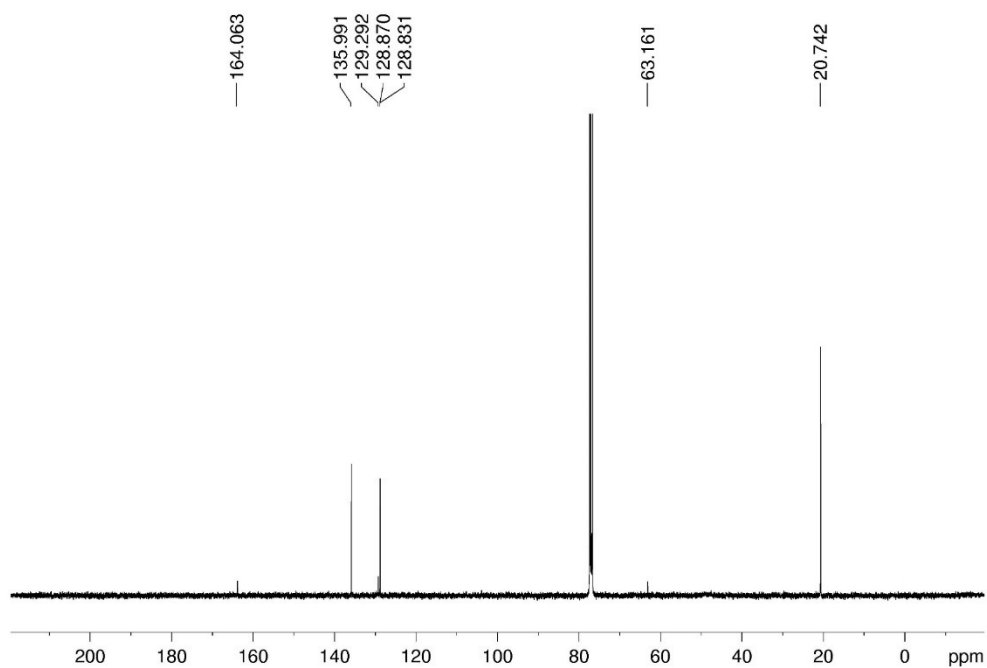

$^{13}\text{C}$  NMR spectrum of compound **3d**

### Spectrum Plot Report

Agilent | Product Services

| Name           | BWZ-4   | Rack Pos.    | Instrument                         | Instrument 1 | Operator                                          |
|----------------|---------|--------------|------------------------------------|--------------|---------------------------------------------------|
| Inj. Vol. (ul) | 5       | Plate Pos.   | IRM Status                         | Success      |                                                   |
| Data File      | BWZ-4.d | Method (Acq) | BWZ20210707-0.1% <i>Ac</i> -4min.m |              | Acq. Time (Local) 7/7/2021 1:20:59 PM (UTC+08:00) |

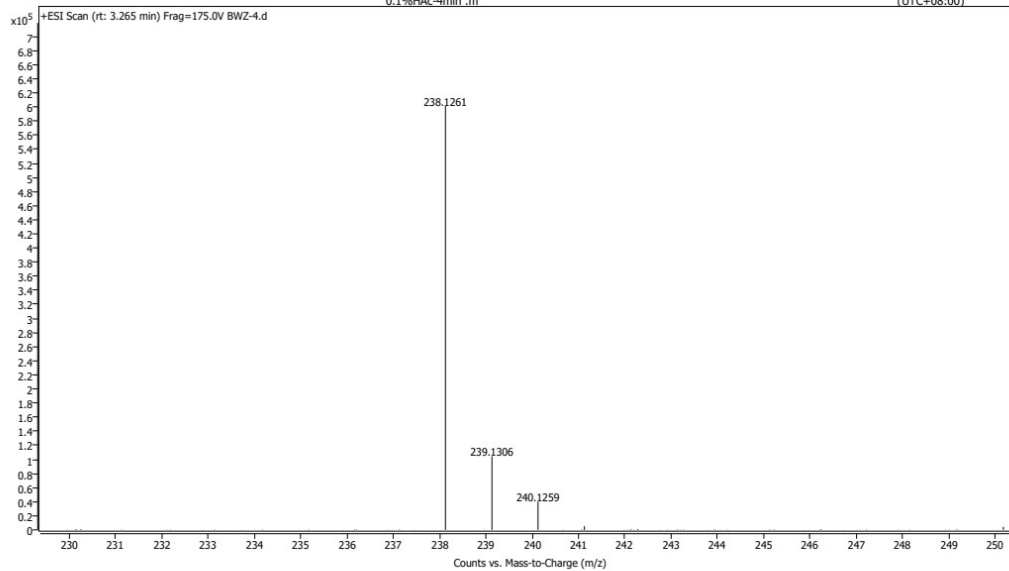

Page 1 of 1

Generated at 1:29 PM on 7/7/2021

HRMS spectrum of compound **3d**

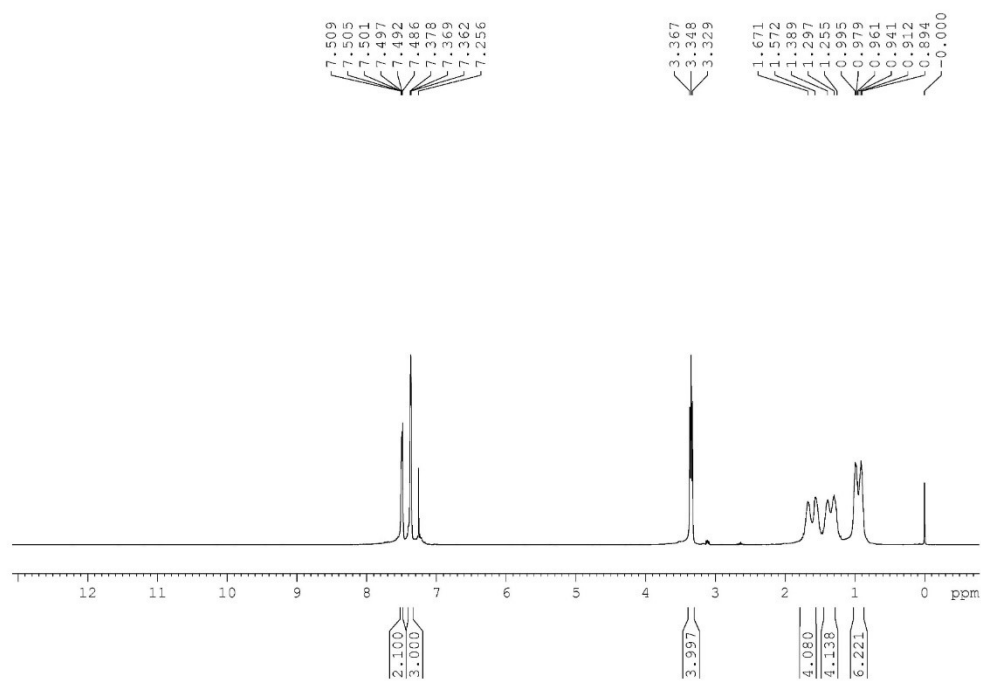

<sup>1</sup>H NMR spectrum of compound **3e**

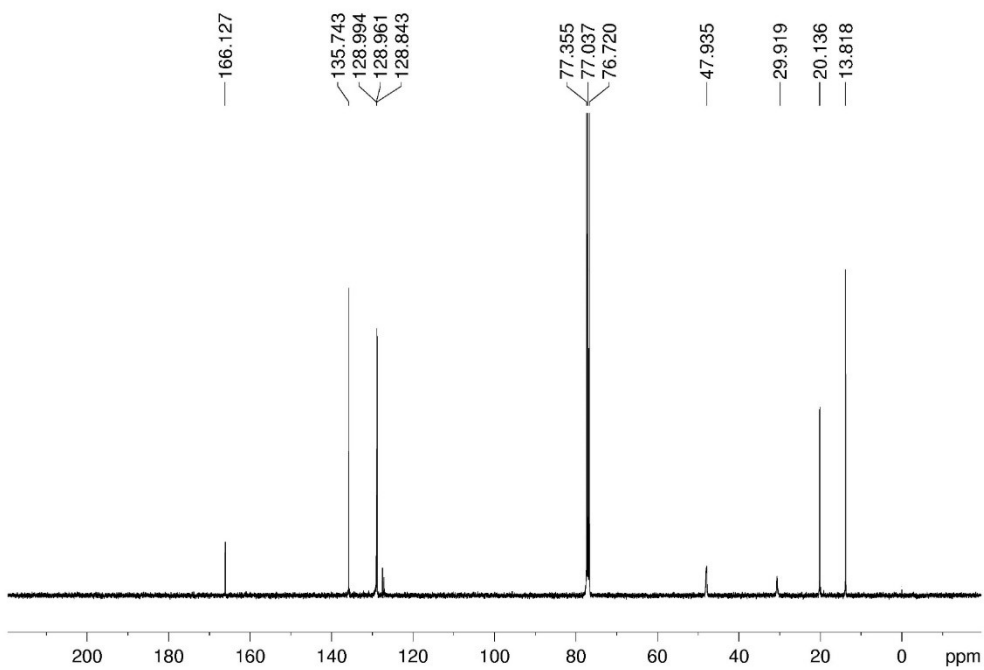

<sup>13</sup>C NMR spectrum of compound **3e**

# Spectrum Plot Report

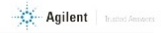

|                |         |              |                                           |            |              |                   |                                 |
|----------------|---------|--------------|-------------------------------------------|------------|--------------|-------------------|---------------------------------|
| Name           | BWZ-5   | Rack Pos.    |                                           | Instrument | Instrument 1 | Operator          |                                 |
| Inj. Vol. (ul) | 5       | Plate Pos.   |                                           | IRM Status | Success      |                   |                                 |
| Data File      | BWZ-5.d | Method (Acq) | BWZ20210707-0.1% <sup>18</sup> HAc-4min.m | Comment    |              | Acq. Time (Local) | 7/7/2021 1:44:29 PM (UTC+08:00) |

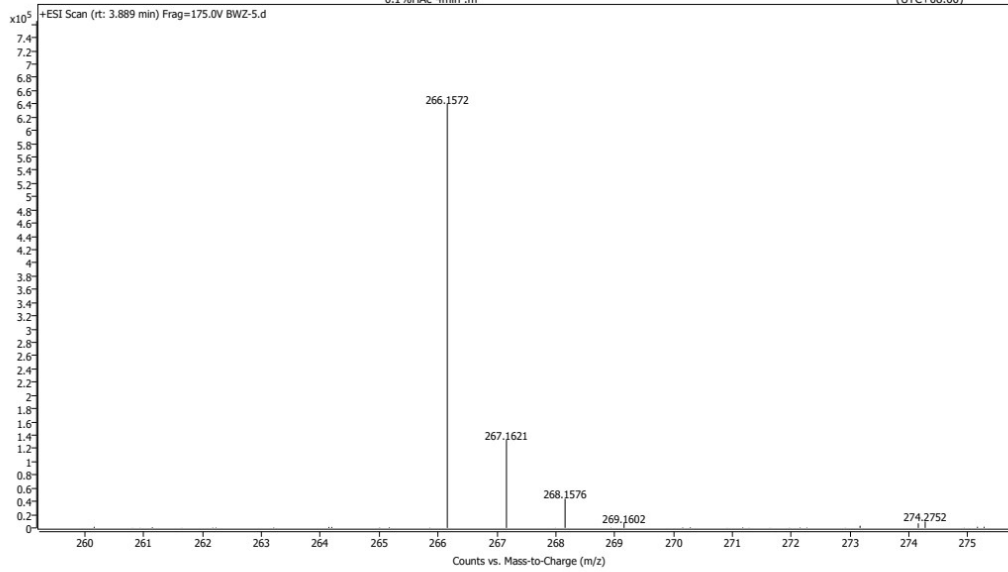

Page 1 of 1

Generated at 3:32 PM on 7/7/2021

## HRMS spectrum of compound 3e

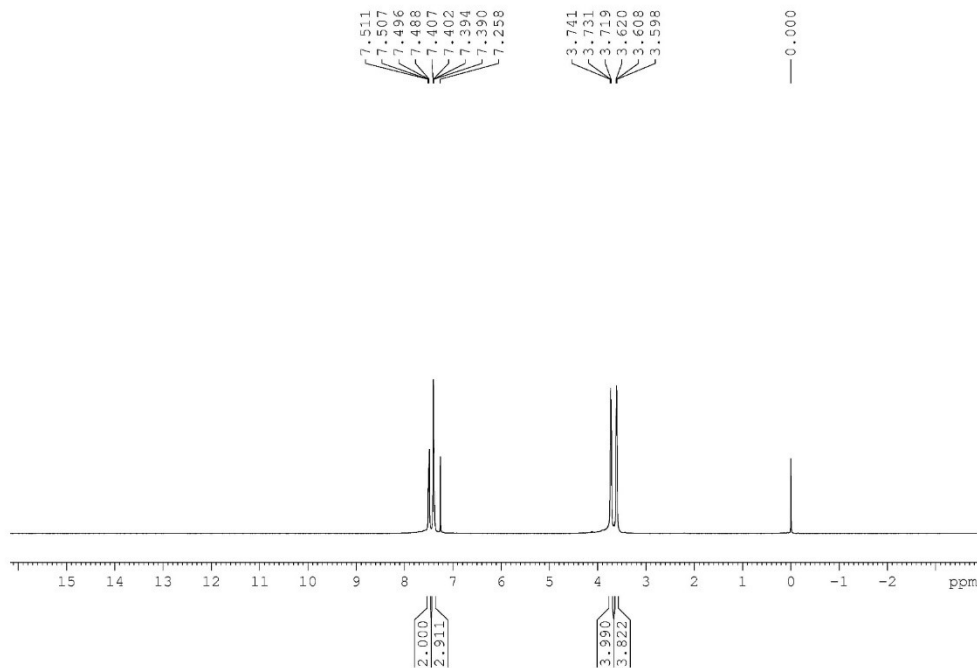

## <sup>1</sup>H NMR spectrum of compound 3f

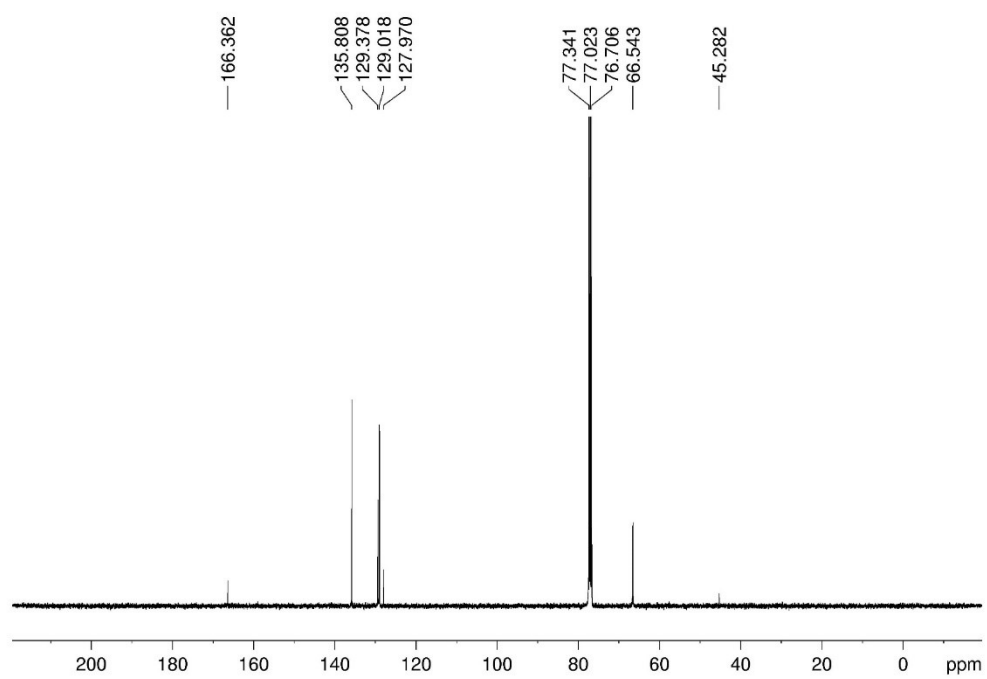

$^{13}\text{C}$  NMR spectrum of compound **3f**

# Spectrum Plot Report

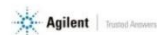

|                |         |              |            |              |                   |
|----------------|---------|--------------|------------|--------------|-------------------|
| Name           | BWZ-6   | Rack Pos.    | Instrument | Instrument 1 | Operator          |
| Inj. Vol. (ul) | 5       | Plate Pos.   | IRM Status | Success      |                   |
| Data File      | BWZ-6.d | Method (Acq) | Comment    |              | Acq. Time (Local) |

BWZ20210707-0.1%HAc-4min.m  
7/7/2021 1:50:05 PM (UTC+08:00)

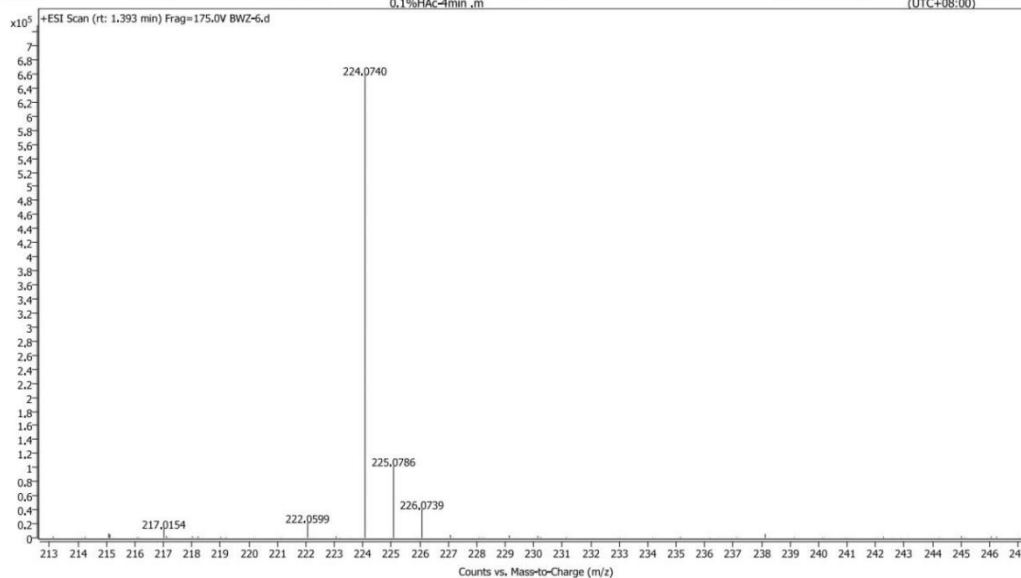

HRMS spectrum of compound **3f**



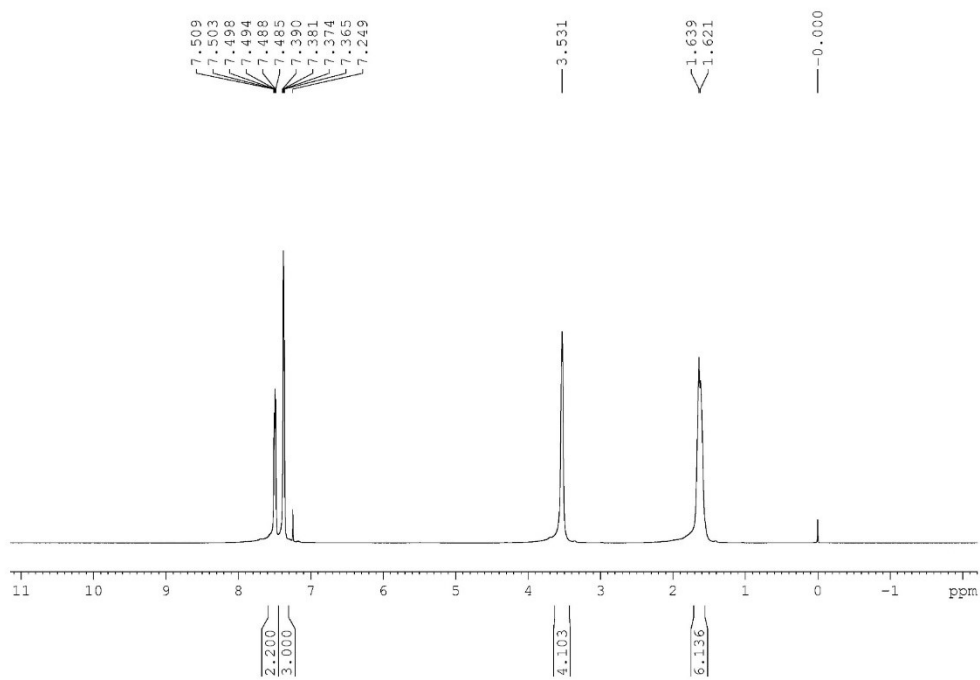

$^1\text{H}$  NMR spectrum of compound **3g**

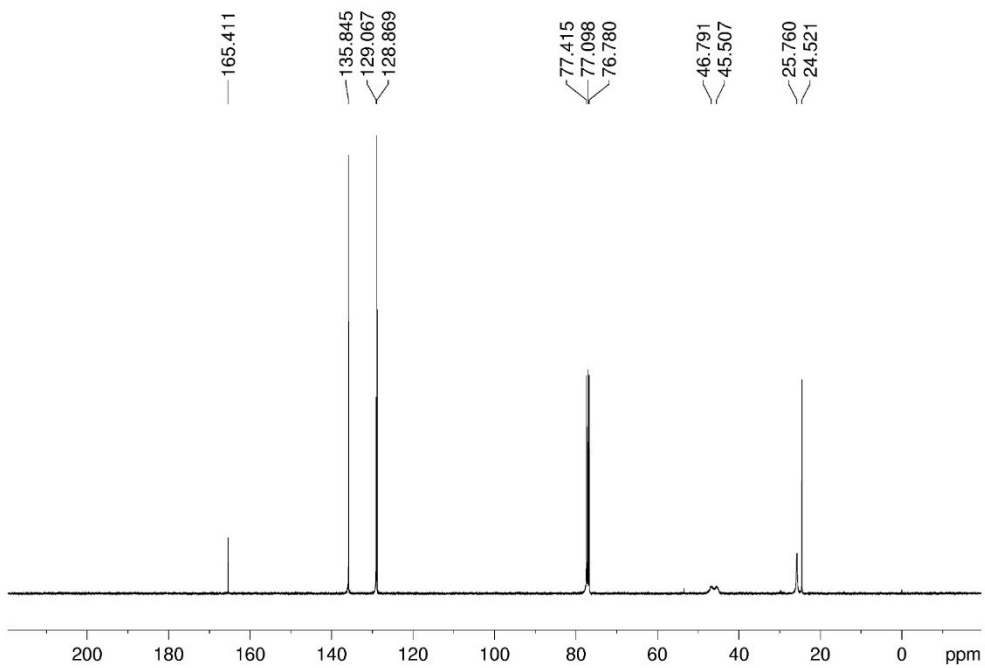

$^{13}\text{C}$  NMR spectrum of compound **3g**

# Spectrum Plot Report

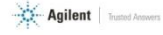

|                |         |              |                                           |              |                                 |
|----------------|---------|--------------|-------------------------------------------|--------------|---------------------------------|
| Name           | BWZ-8   | Rack Pos.    | Instrument                                | Instrument 1 | Operator                        |
| Inj. Vol. (ul) | 5       | Plate Pos.   | IRM Status                                | Success      |                                 |
| Data File      | BWZ-8.d | Method (Acq) | Comment                                   |              | Acq. Time (Local)               |
|                |         |              | BWZ20210707-0.1% <sup>94</sup> HAc-tmin.m |              | 7/7/2021 2:01:33 PM (UTC+08:00) |

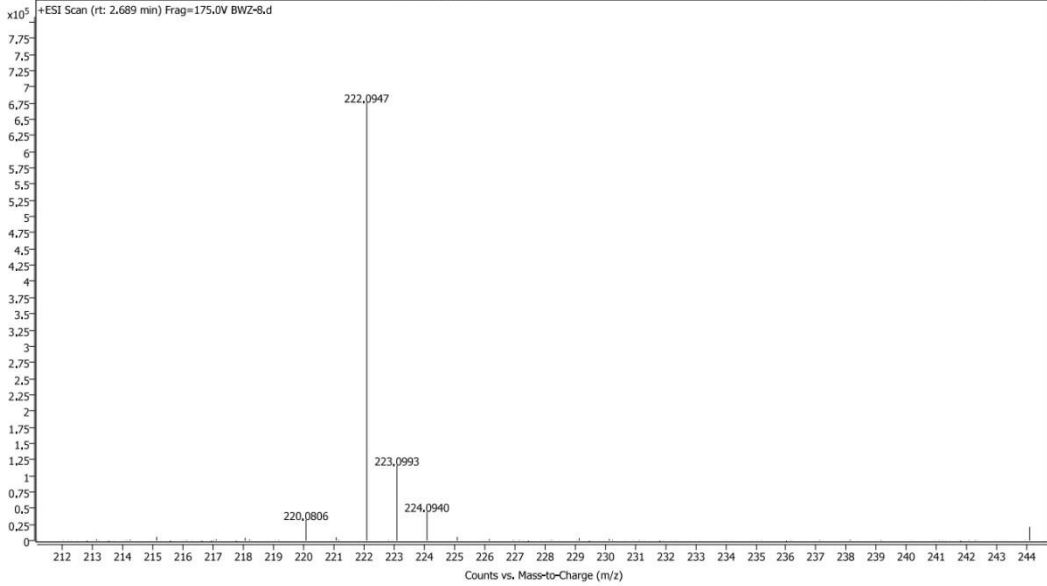

HRMS spectrum of compound **3g**

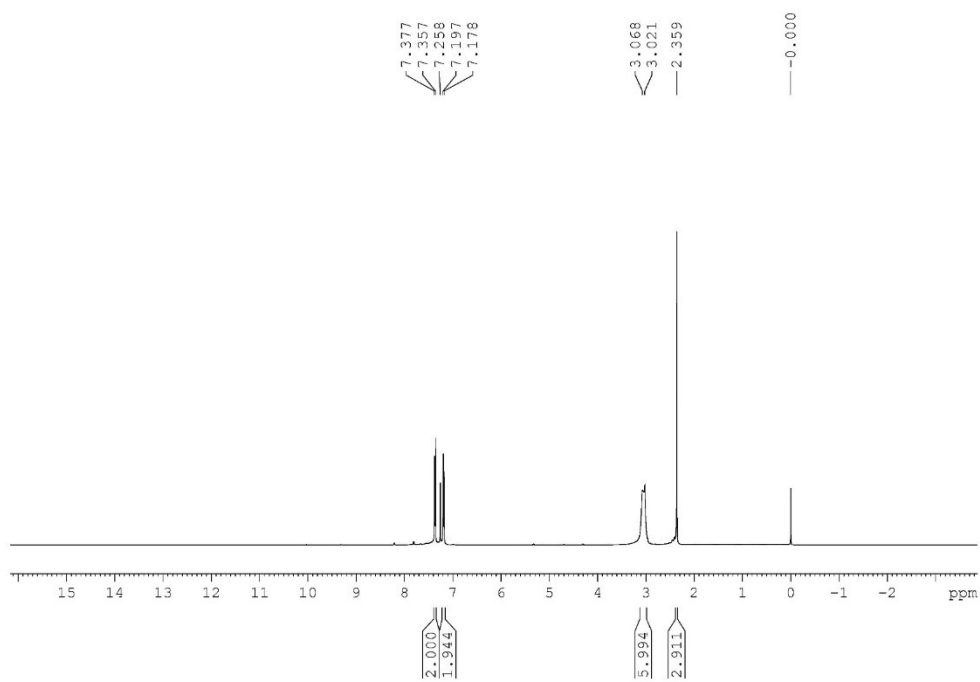

$^1\text{H}$  NMR spectrum of compound **3h**

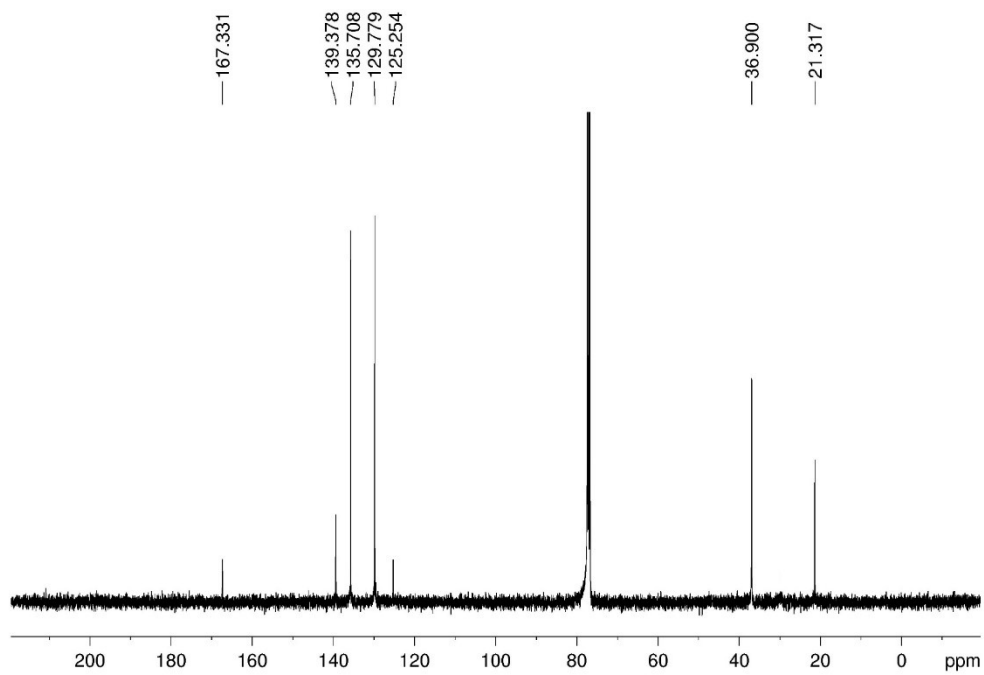

$^{13}\text{C}$  NMR spectrum of compound **3h**

# Spectrum Plot Report

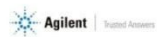

Name: Inj. Vol. (ul) Data File: BWZ-7 5 BWZ-7.d Rack Pos. Plate Pos. Method (Acq): BWZ20210707-0,1%HAc-4min.m Instrument IRM Status Comment: Instrument 1 Success Operator: Acq. Time (Local) 7/7/2021 1:56:00 PM (UTC+08:00)

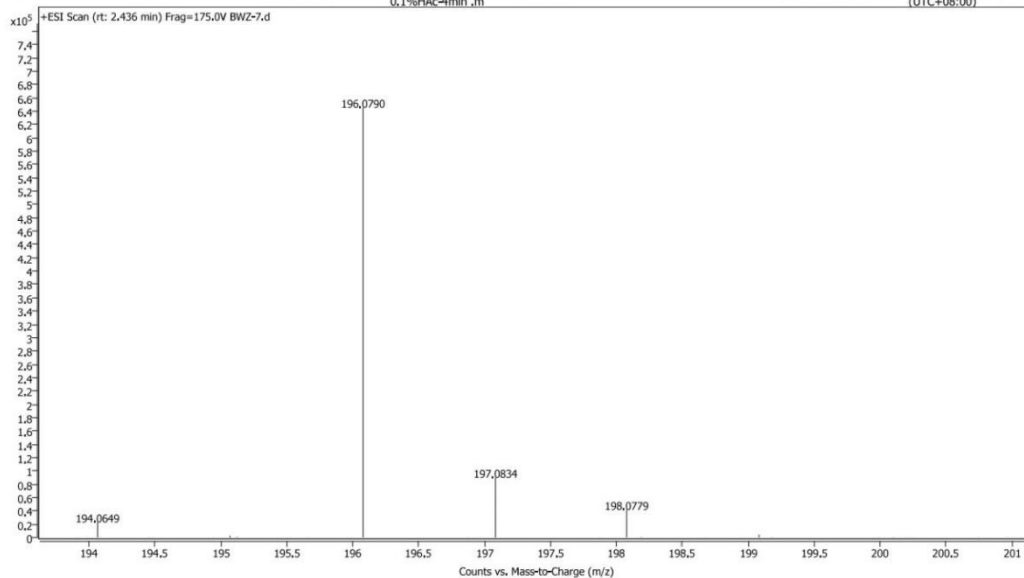

HRMS spectrum of compound **3h**

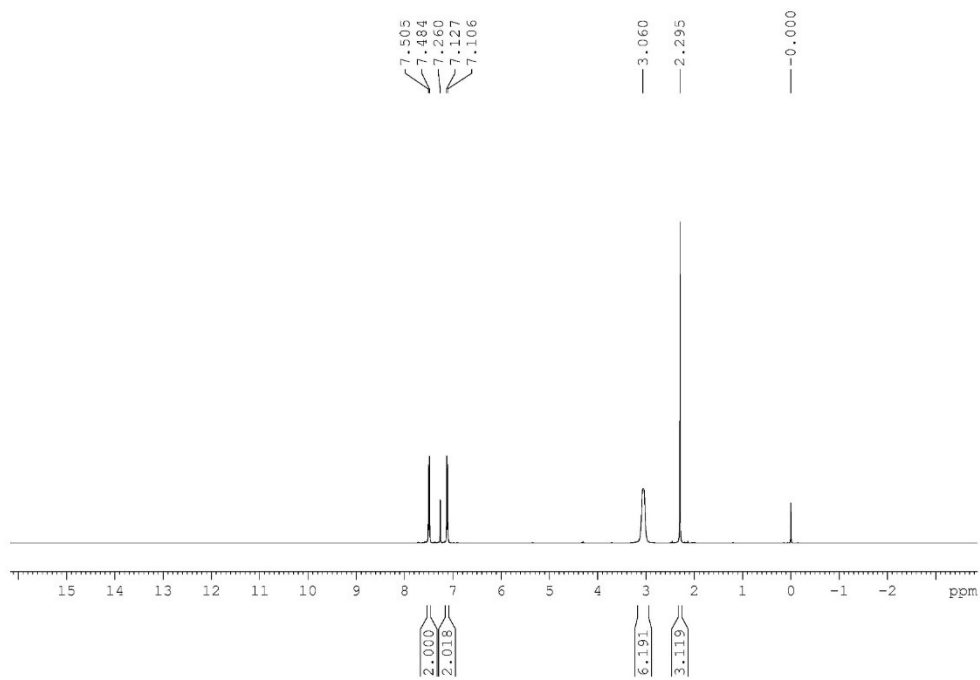

$^1\text{H}$  NMR spectrum of compound **3j**

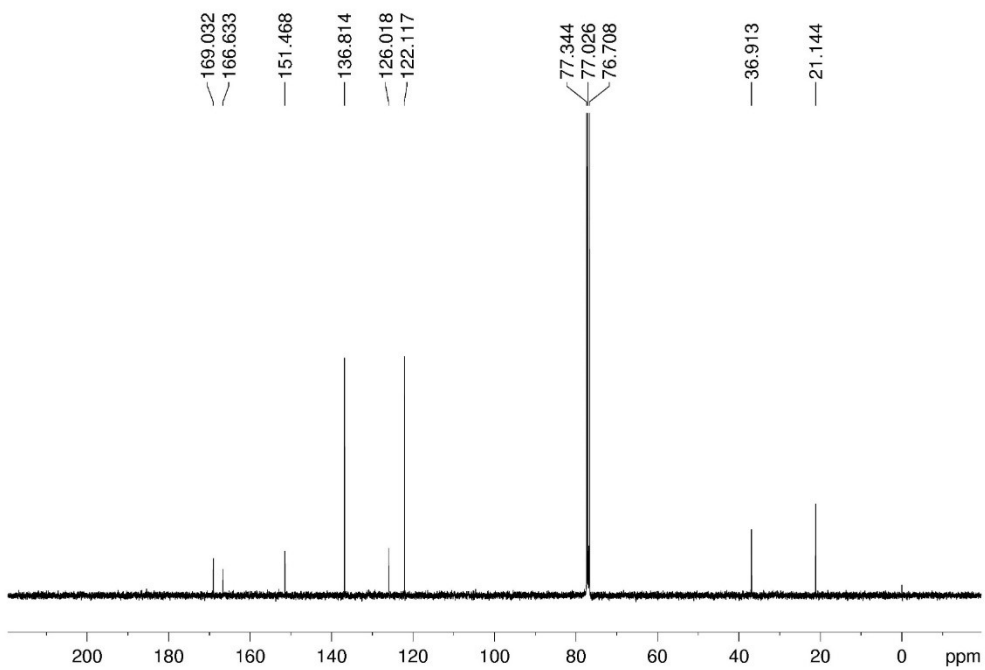

$^{13}\text{C}$  NMR spectrum of compound **3j**

# Spectrum Plot Report

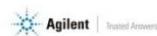

Name: Inj. Vol. (µl) Data File: BWZ-16 5 BWZ-16.d  
Rack Pos. Plate Pos. Method (Acq): BWZ20210707-0.1%HAc-4min .m  
Instrument: Instrument 1 Success  
IRM Status Comment  
Operator: Acq. Time (Local) 7/7/2021 2:52:08 PM (UTC+08:00)

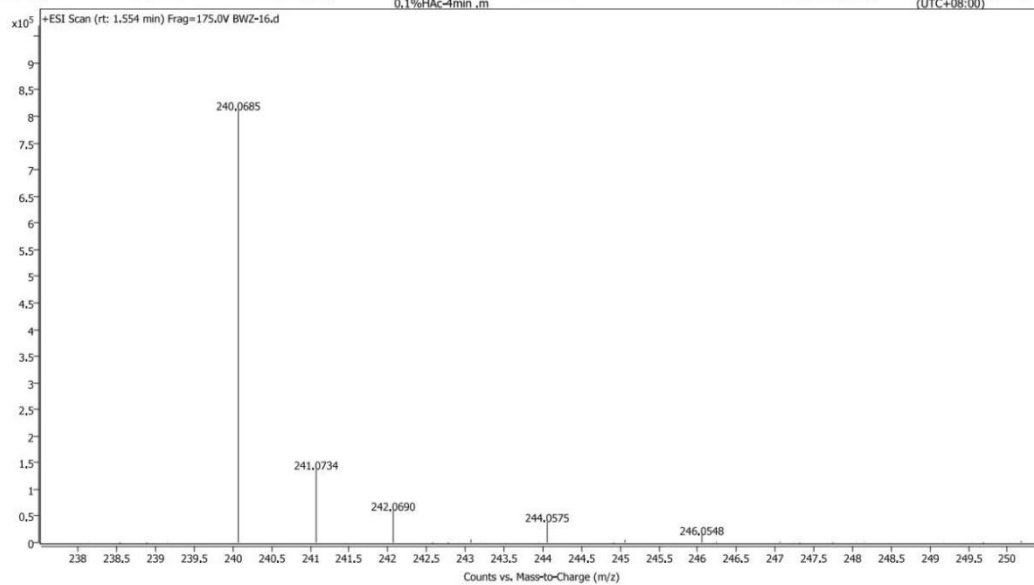

HRMS spectrum of compound **3j**

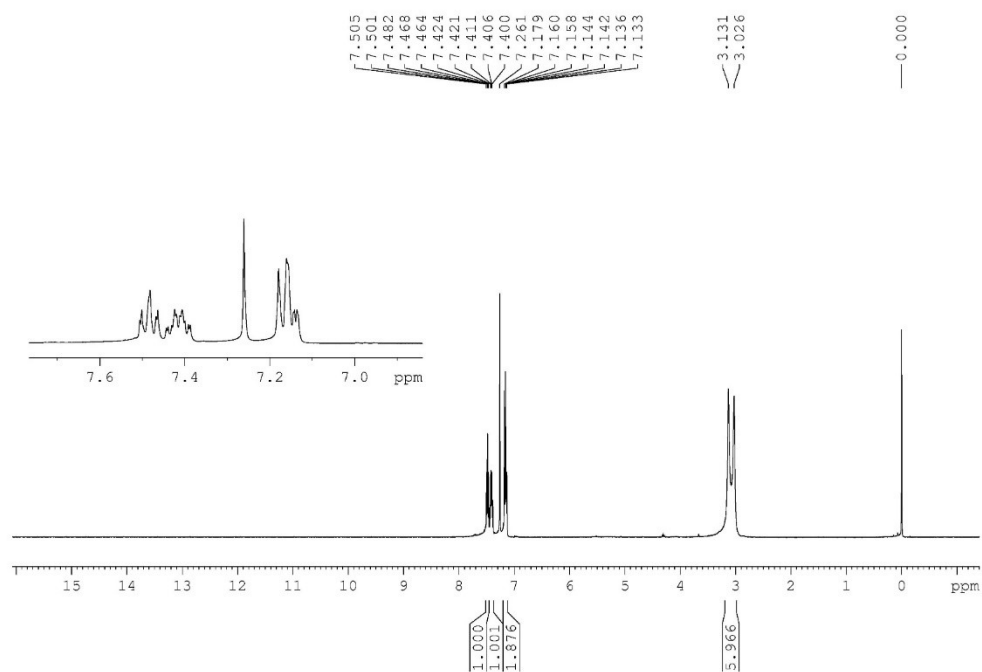

$^1\text{H}$  NMR spectrum of compound **3k**

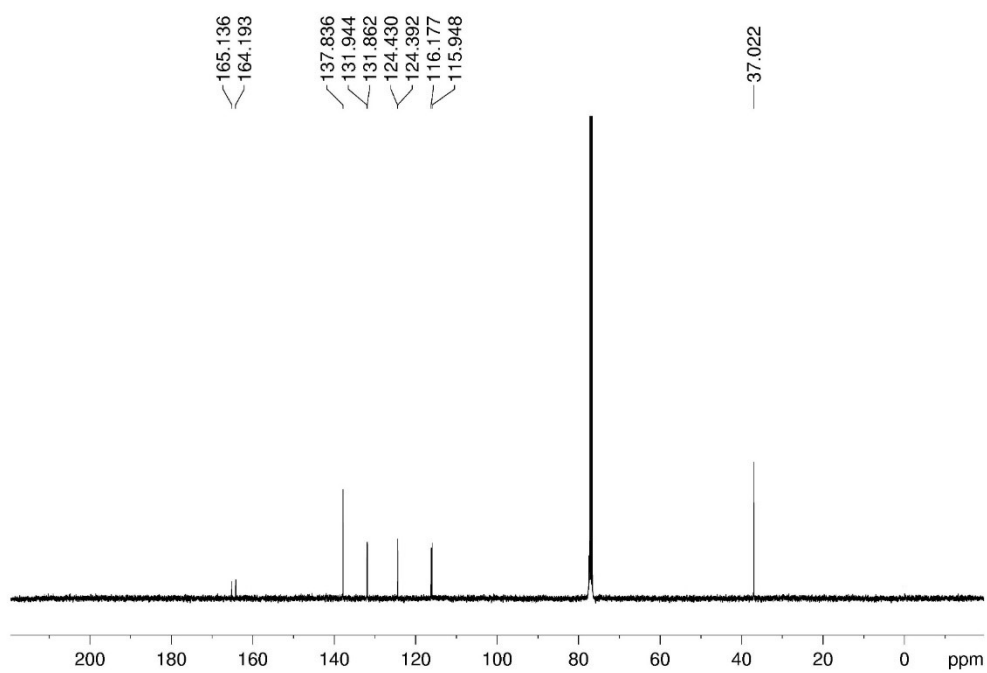

$^{13}\text{C}$  NMR spectrum of compound **3k**

# Spectrum Plot Report

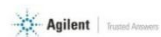

|                |         |                             |            |              |                                 |
|----------------|---------|-----------------------------|------------|--------------|---------------------------------|
| Name           | BWZ-9   | Rack Pos.                   | Instrument | Instrument 1 | Operator                        |
| Inj. Vol. (µl) | 5       | Plate Pos.                  | IRM Status | Success      |                                 |
| Data File      | BWZ-9.d | Method (Acq)                | Comment    |              | Acq. Time (Local)               |
|                |         | BWZ20210707-0.1%+Ac-1min .m |            |              | 7/7/2021 2:07:17 PM (UTC+08:00) |

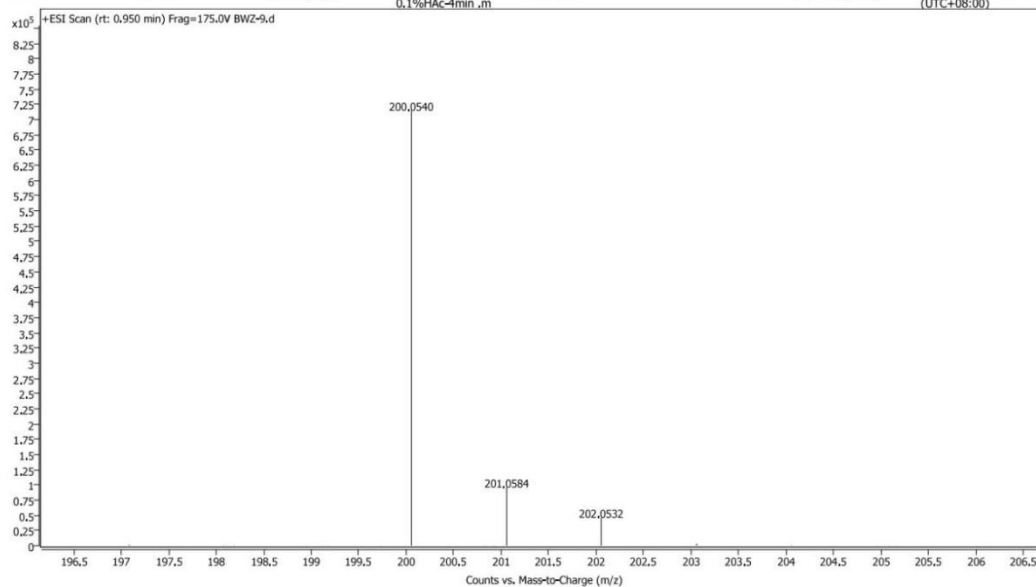

HRMS spectrum of compound **3k**



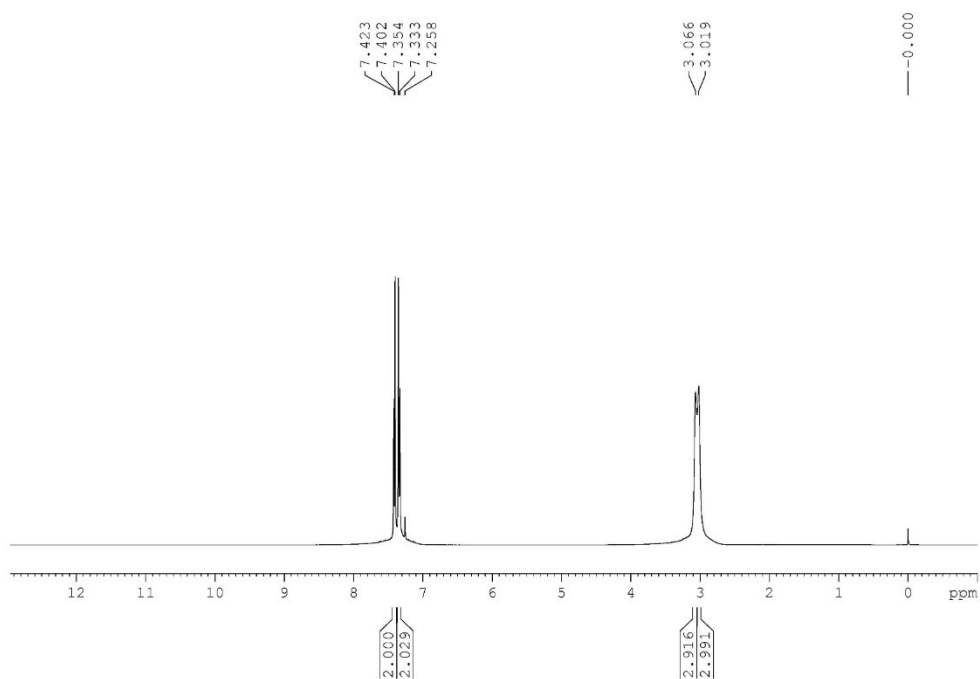

$^1\text{H}$  NMR spectrum of compound **31**

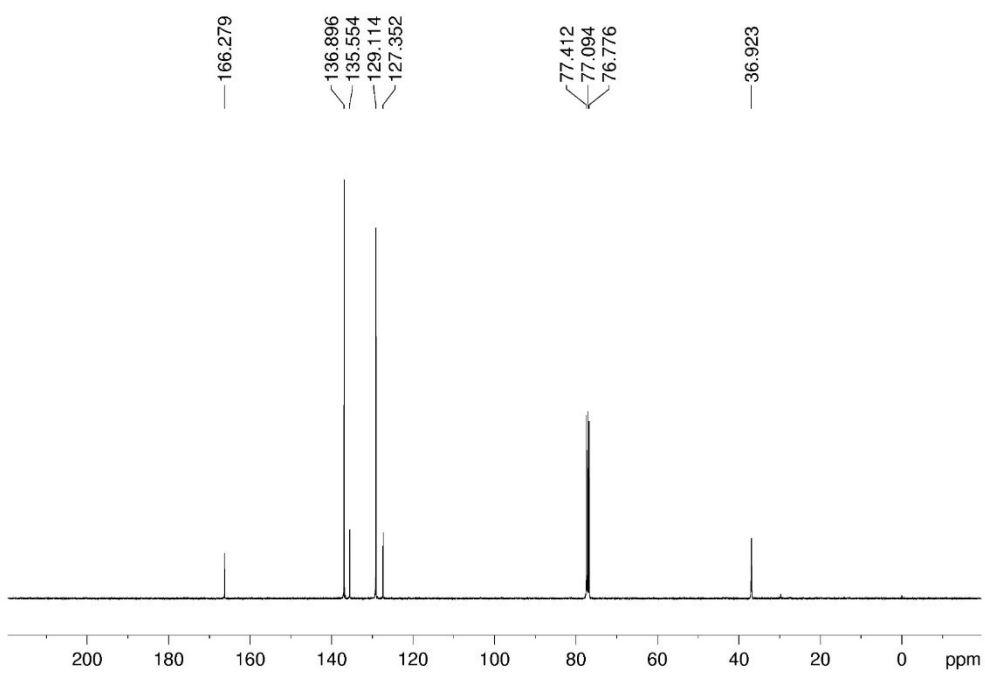

$^{13}\text{C}$  NMR spectrum of compound **31**

# Spectrum Plot Report

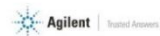

|                |          |              |                            |              |                                 |
|----------------|----------|--------------|----------------------------|--------------|---------------------------------|
| Name           | BWZ-10   | Rack Pos.    | Instrument                 | Instrument 1 | Operator                        |
| Inj. Vol. (µl) | 5        | Plate Pos.   | IRM Status                 | Success      |                                 |
| Data File      | BWZ-10.d | Method (Acq) | Comment                    |              | Acq. Time (Local)               |
|                |          |              | BWZ20210707-0,1%HAc-4min.m |              | 7/7/2021 2:17:17 PM (UTC+08:00) |

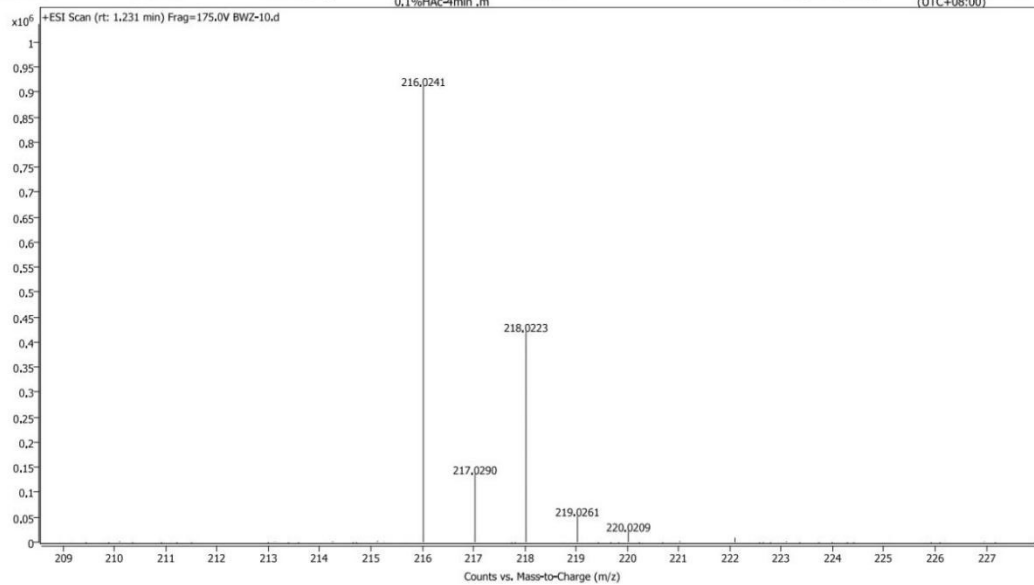

HRMS spectrum of compound **31**

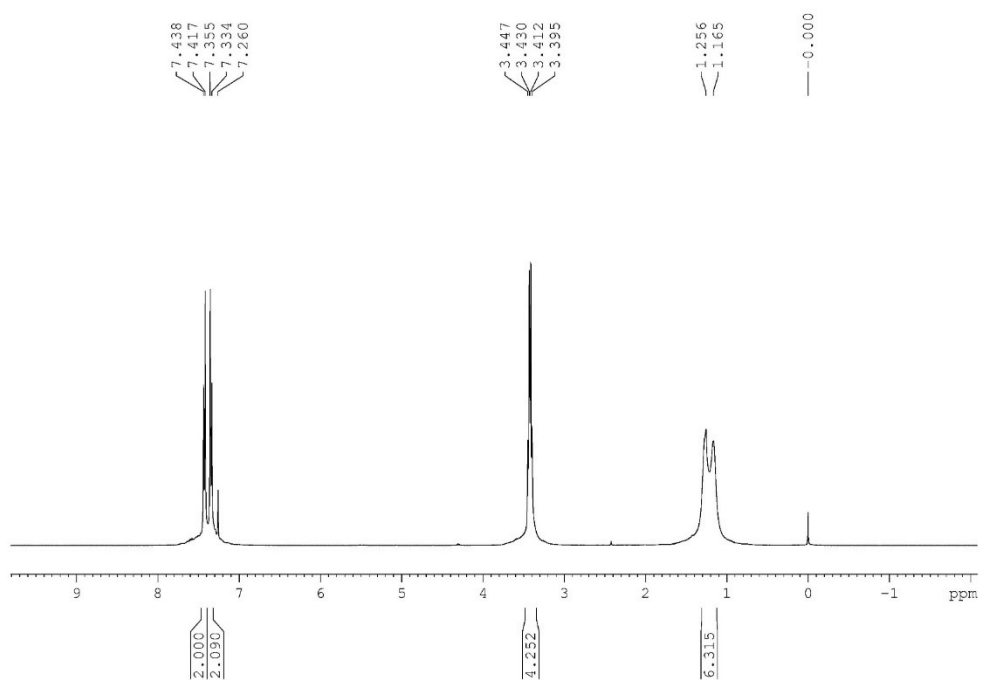

$^1\text{H}$  NMR spectrum of compound **3m**

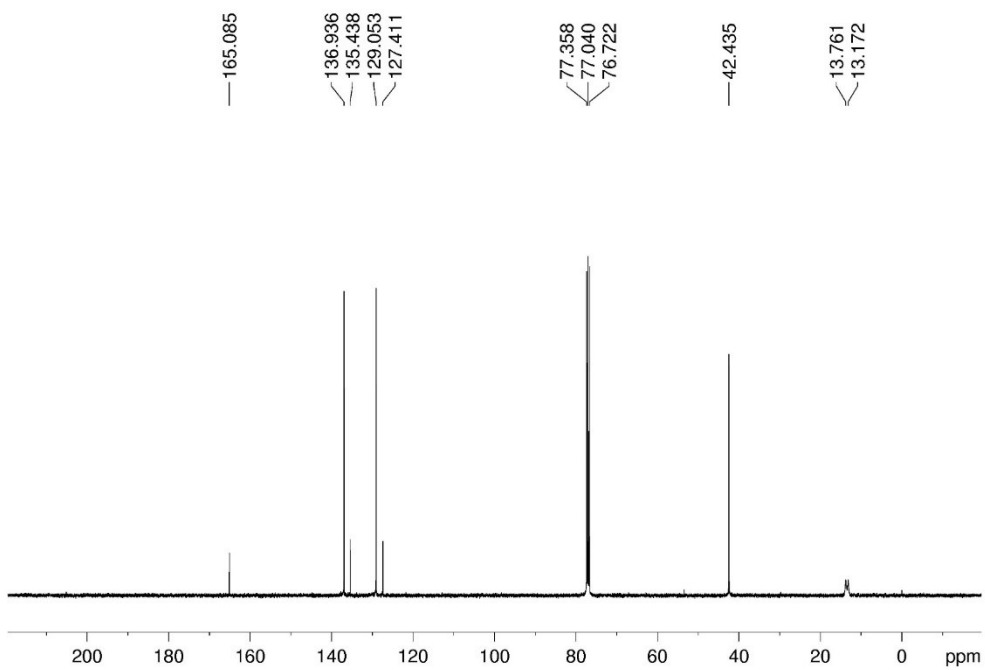

$^{13}\text{C}$  NMR spectrum of compound **3m**

# Spectrum Plot Report

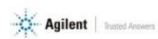

|                |          |              |                                      |              |                                 |
|----------------|----------|--------------|--------------------------------------|--------------|---------------------------------|
| Name           | BWZ-11   | Rack Pos.    | Instrument                           | Instrument 1 | Operator                        |
| Inj. Vol. (ul) | 5        | Plate Pos.   | IRM Status                           | Success      |                                 |
| Data File      | BWZ-11.d | Method (Acq) | Comment                              |              | Acq. Time (Local)               |
|                |          |              | BWZ20210707-0,1% <i>HAc</i> -4min .m |              | 7/7/2021 2:23:13 PM (UTC+08:00) |

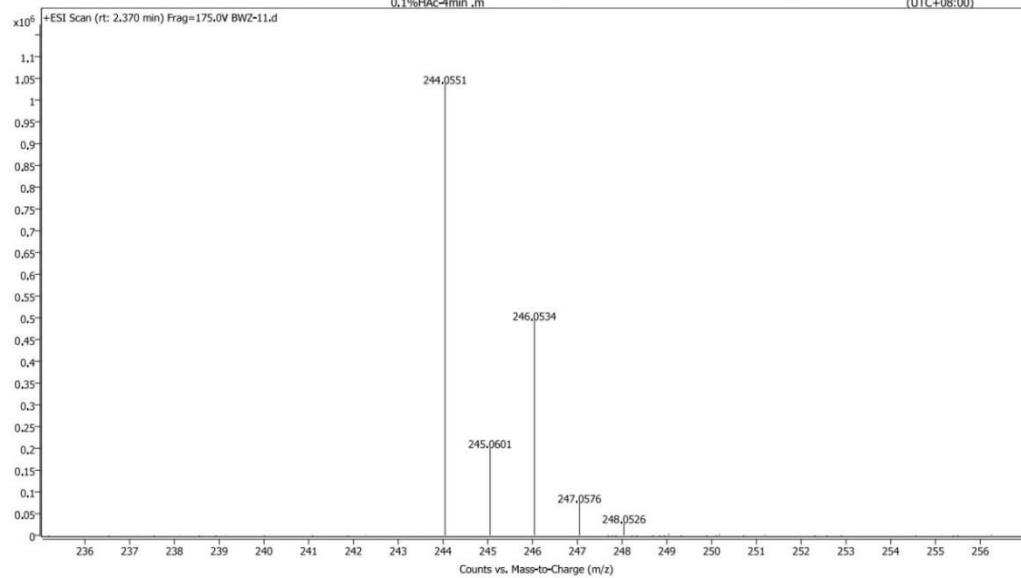

HRMS spectrum of  
compound **3m**

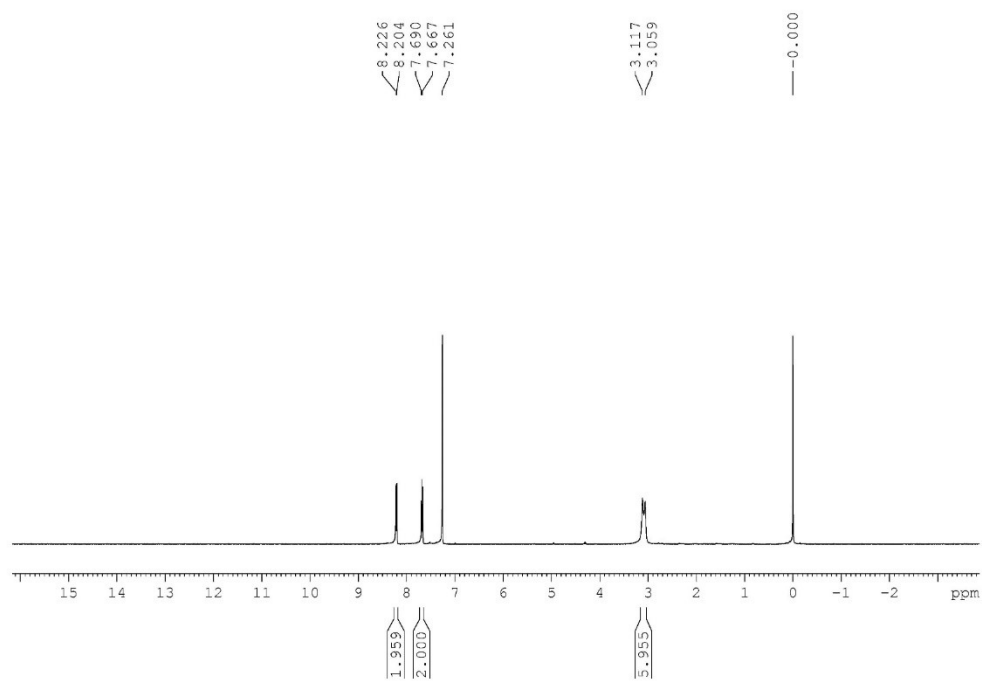

$^1\text{H}$  NMR spectrum of compound **3n**

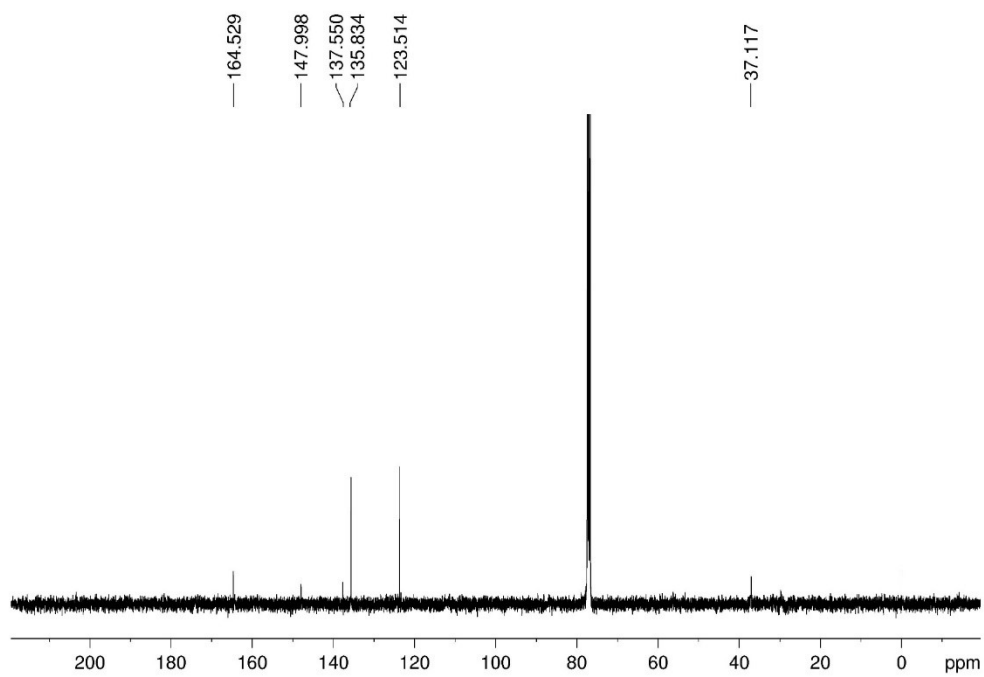

$^{13}\text{C}$  NMR spectrum of compound **3n**

# Spectrum Plot Report

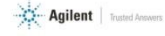

|                |            |              |               |              |                                 |
|----------------|------------|--------------|---------------|--------------|---------------------------------|
| Name           | BWZ-12-1   | Rack Pos.    | Instrument    | Instrument 1 | Operator                        |
| Inj. Vol. (ul) | 5          | Plate Pos.   | IRM Status    | Success      |                                 |
| Data File      | BWZ-12-1.d | Method (Acq) | LZH20210707.m | Comment      | Acq. Time (Local)               |
|                |            |              |               |              | 7/8/2021 9:56:07 AM (UTC+08:00) |

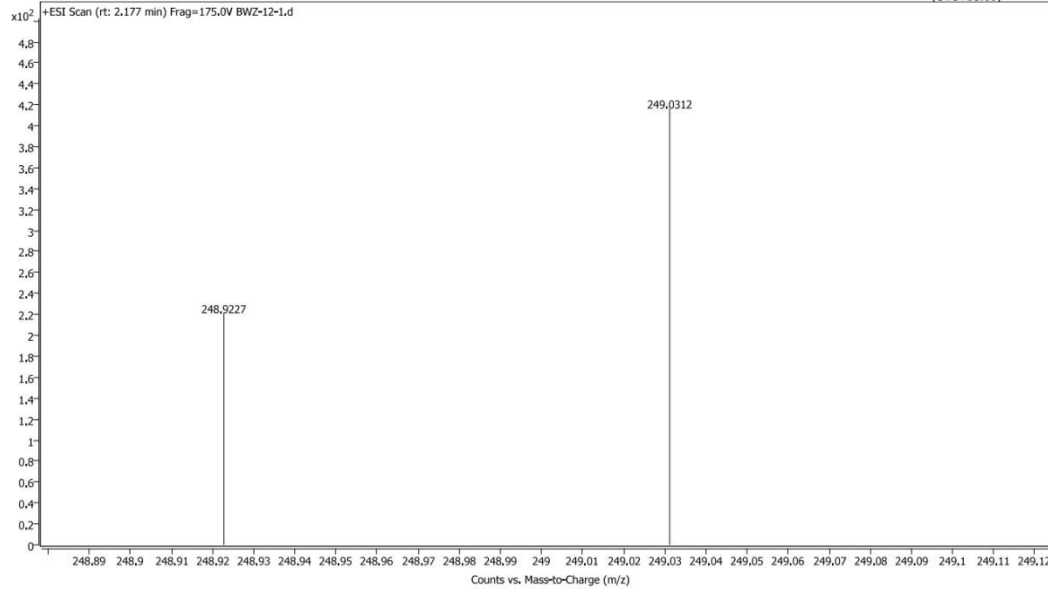

HRMS spectrum of compound **3n**

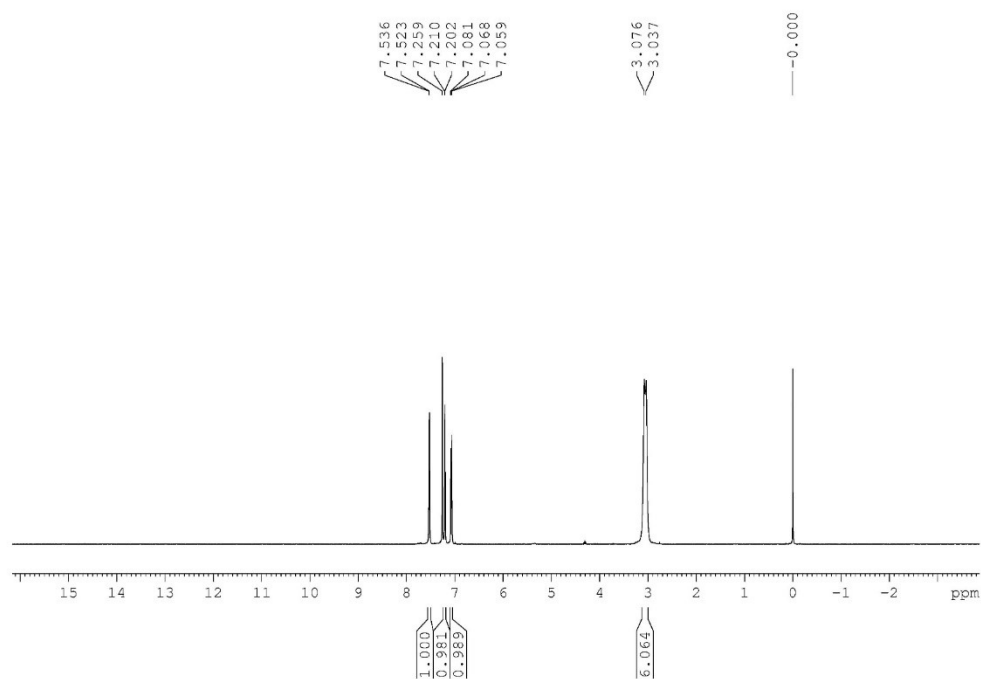

$^1\text{H}$  NMR spectrum of compound **30**

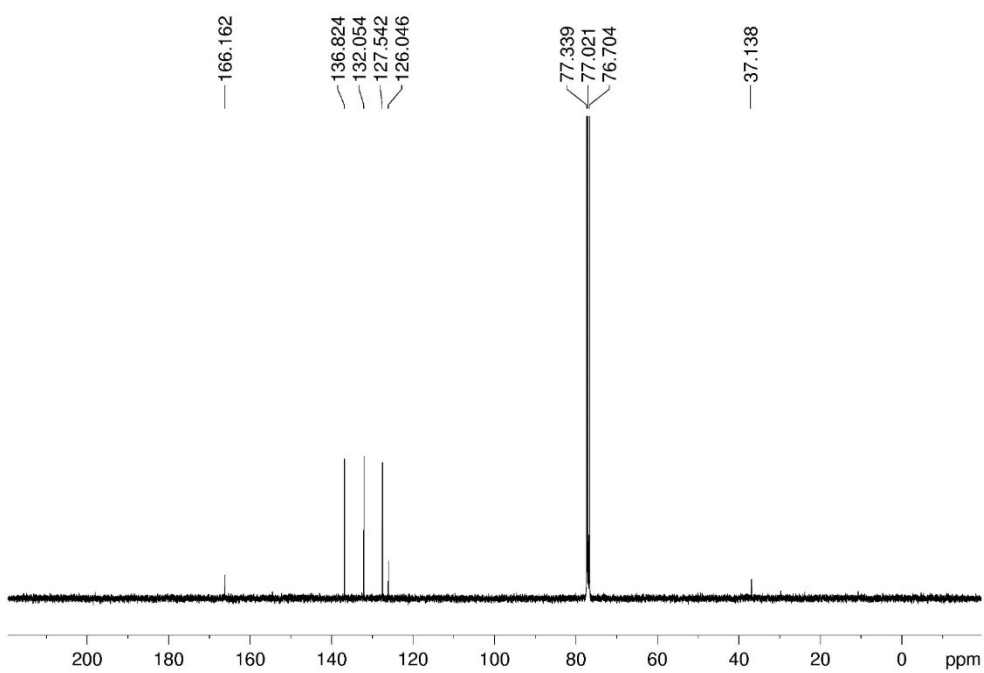

$^{13}\text{C}$  NMR spectrum of compound **30**

# Spectrum Plot Report

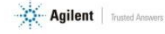

|                |          |              |                            |              |                                 |
|----------------|----------|--------------|----------------------------|--------------|---------------------------------|
| Name           | BWZ-17   | Rack Pos.    | Instrument                 | Instrument 1 | Operator                        |
| Inj. Vol. (ul) | 5        | Plate Pos.   | IRM Status                 | Success      |                                 |
| Data File      | BWZ-17.d | Method (Acq) | Comment                    |              | Acq. Time (Local)               |
|                |          |              | BWZ20210707-0.1%tAc-4min.m |              | 7/7/2021 2:57:15 PM (UTC+08:00) |

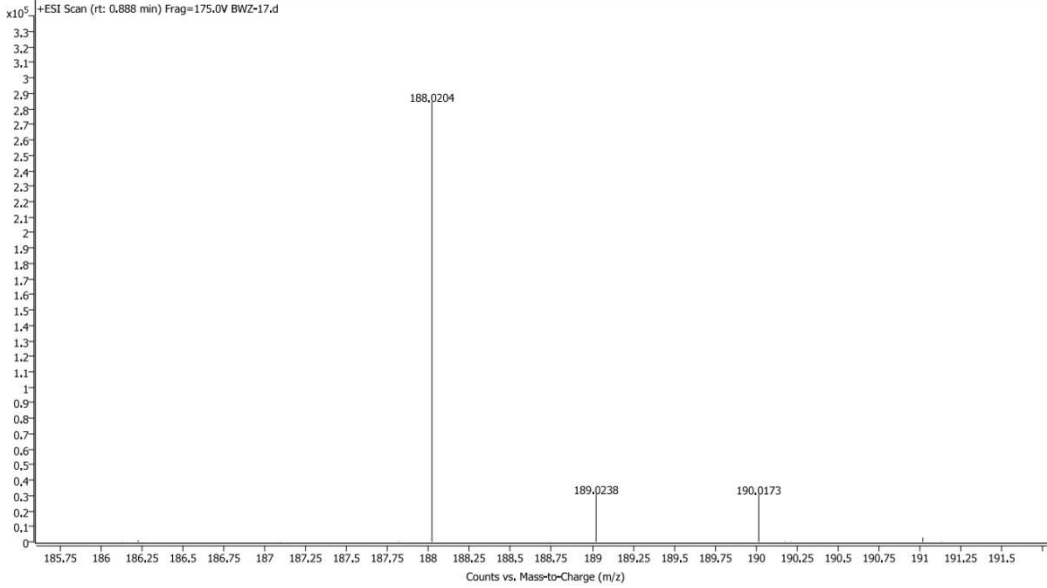

HRMS spectrum of compound **3o**



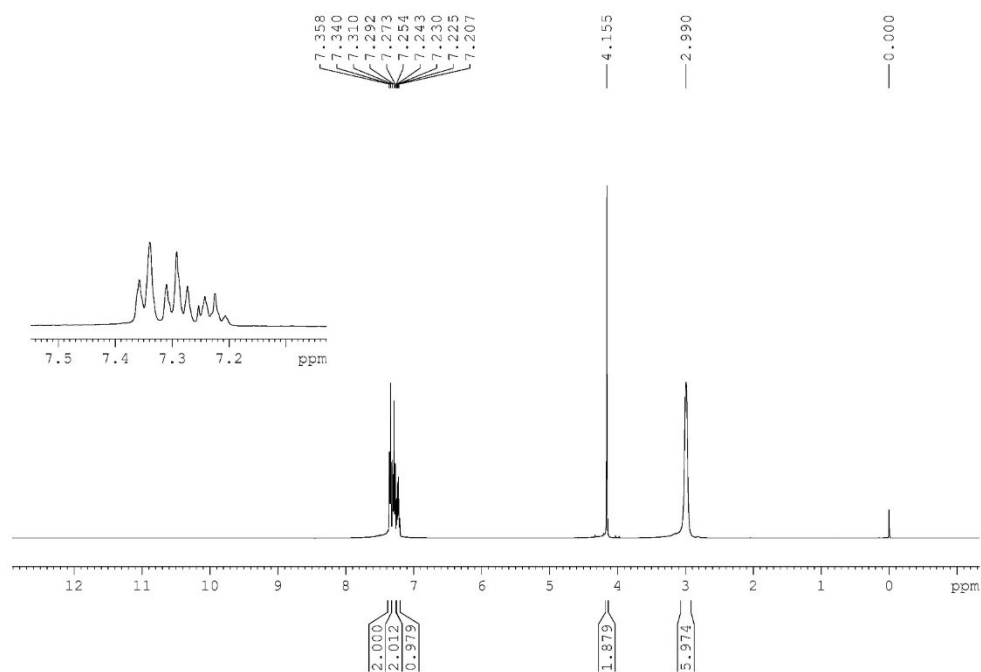

$^1\text{H}$  NMR spectrum of compound **3p**

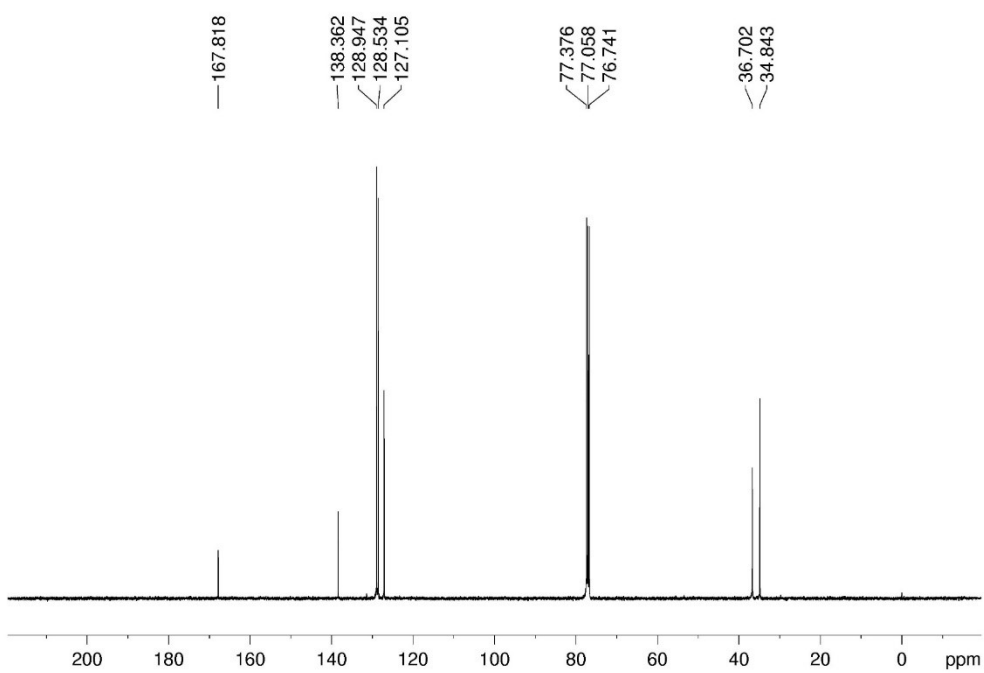

$^{13}\text{C}$  NMR spectrum of compound **3p**

# Spectrum Plot Report

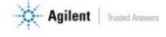

|                |          |              |                                     |              |                                 |
|----------------|----------|--------------|-------------------------------------|--------------|---------------------------------|
| Name           | BWZ-13   | Rack Pos.    | Instrument                          | Instrument 1 | Operator                        |
| Inj. Vol. (ul) | 5        | Plate Pos.   | IRM Status                          | Success      |                                 |
| Data File      | BWZ-13.d | Method (Acq) | Comment                             |              | Acq. Time (Local)               |
|                |          |              | BWZ20210707-0.1% <i>HAc</i> -4min.m |              | 7/7/2021 2:36:08 PM (UTC+08:00) |

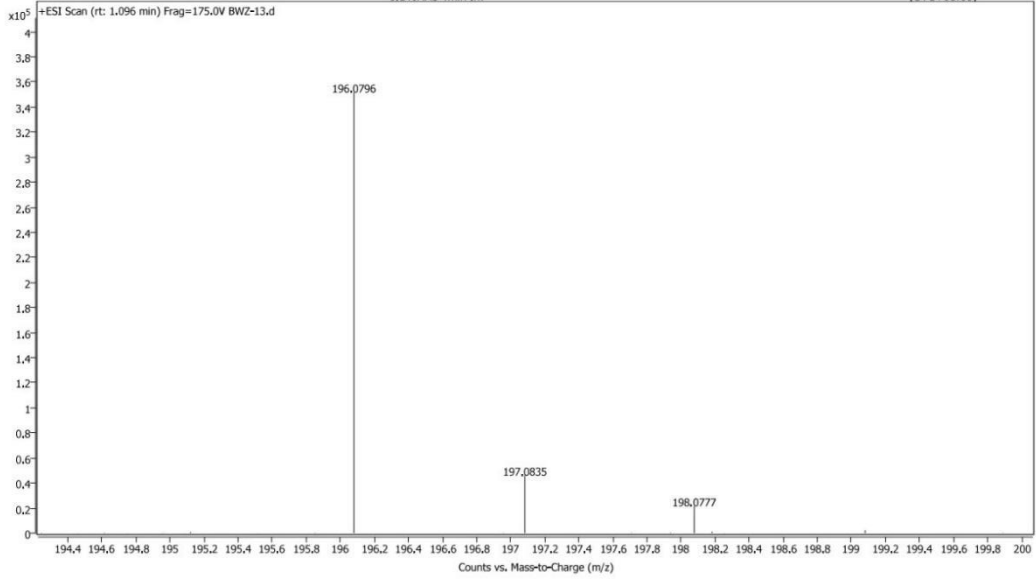

HRMS spectrum of compound **3p**

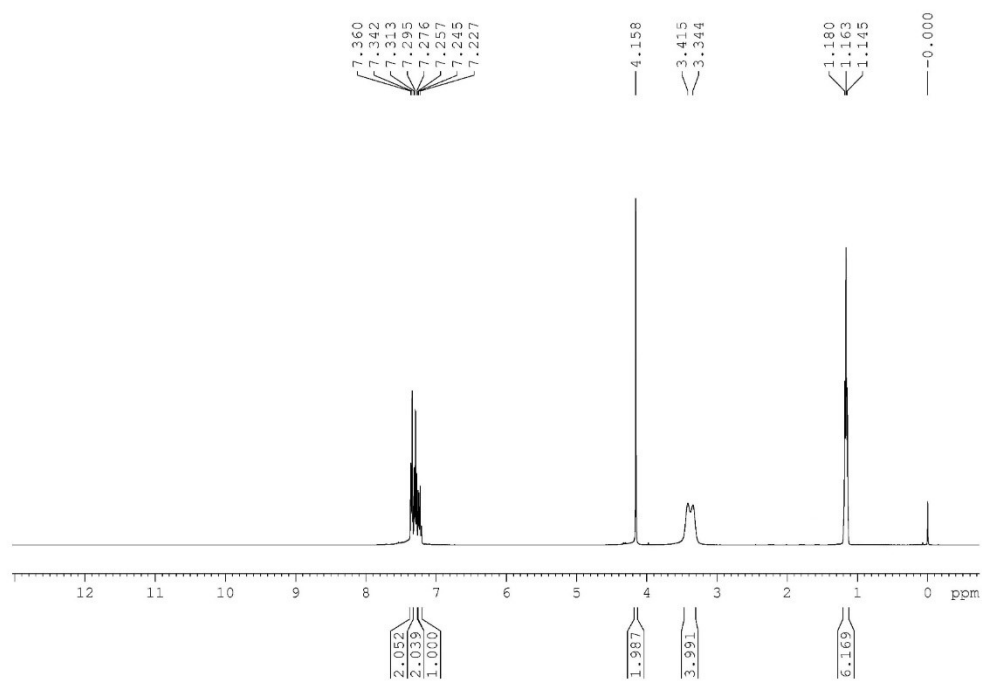

$^1\text{H}$  NMR spectrum of compound **3q**

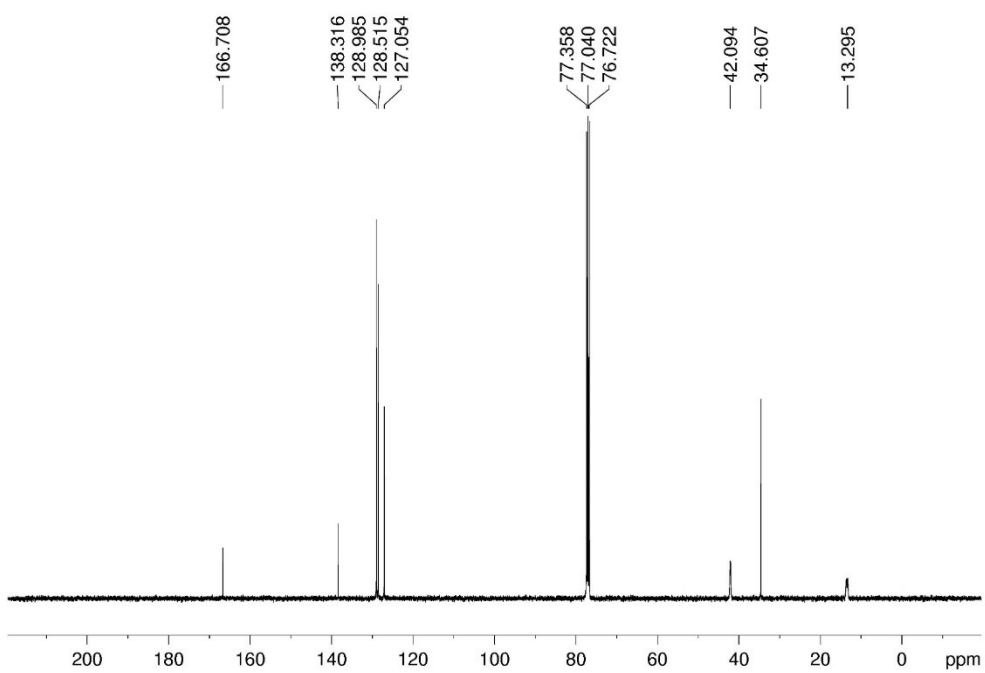

$^{13}\text{C}$  NMR spectrum of compound **3q**

# Spectrum Plot Report

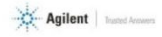

|                |          |              |                            |              |                                 |
|----------------|----------|--------------|----------------------------|--------------|---------------------------------|
| Name           | BWZ-14   | Rack Pos.    | Instrument                 | Instrument 1 | Operator                        |
| Inj. Vol. (ul) | 5        | Plate Pos.   | IRM Status                 | Success      |                                 |
| Data File      | BWZ-14.d | Method (Acq) | Comment                    |              | Acq. Time (Local)               |
|                |          |              | BWZ20210707-0.1%tAC-4min.m |              | 7/7/2021 2:41:38 PM (UTC+08:00) |

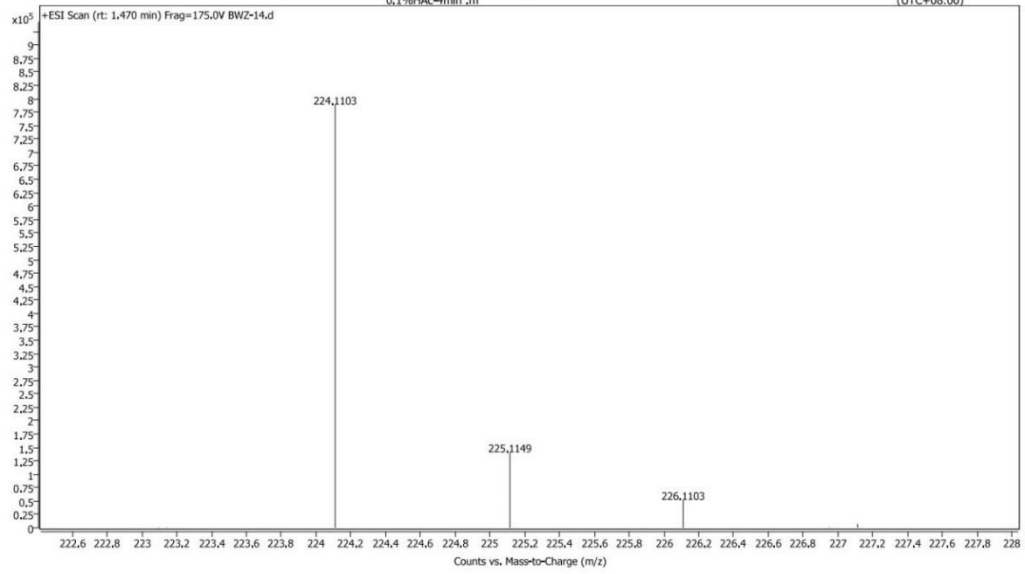

HRMS spectrum of compound **3q**

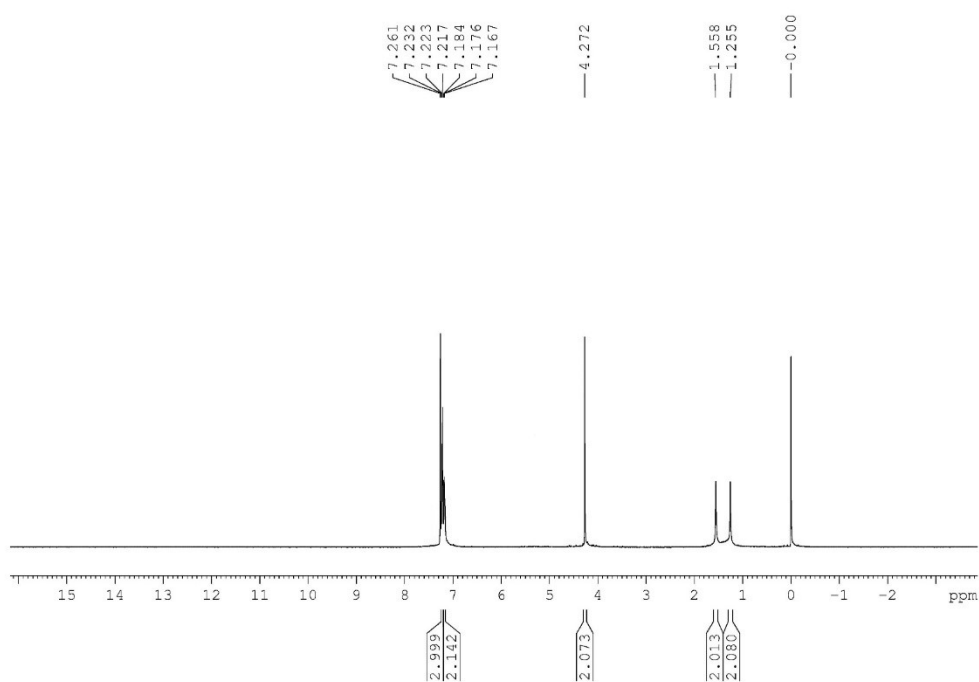

<sup>1</sup>H NMR spectrum of compound **3r**

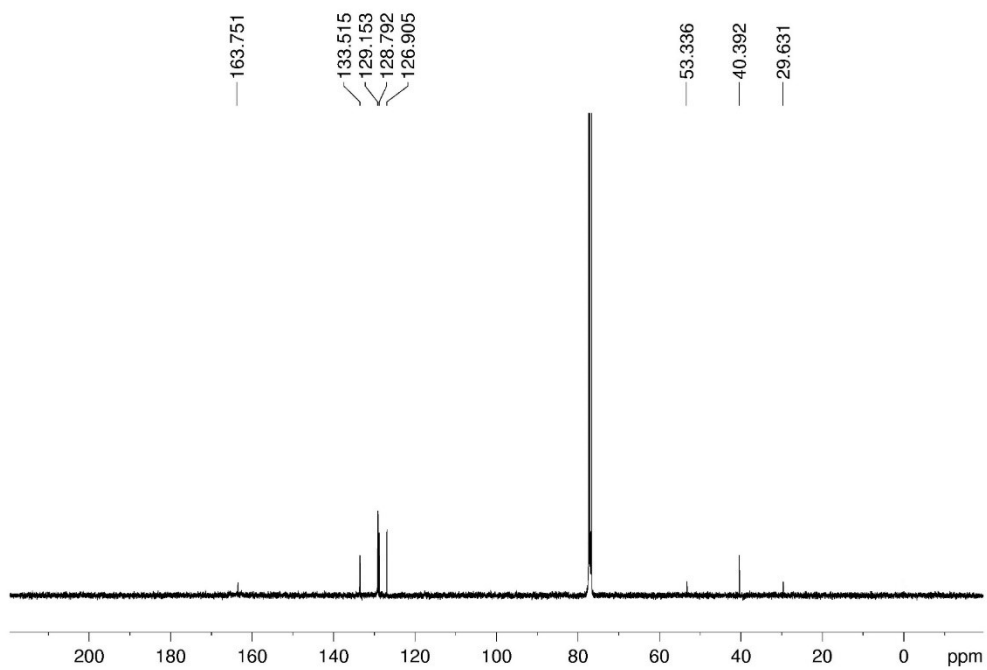

<sup>13</sup>C NMR spectrum of compound **3r**

# Spectrum Plot Report

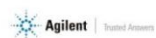

|                |            |              |               |              |                                  |
|----------------|------------|--------------|---------------|--------------|----------------------------------|
| Name           | BWZ-15-1   | Rack Pos.    | Instrument    | Instrument 1 | Operator                         |
| Inj. Vol. (ul) | 5          | Plate Pos.   | IRM Status    | Success      |                                  |
| Data File      | BWZ-15-1.d | Method (Acq) | LZH20210707.m | Comment      | Acq. Time (Local)                |
|                |            |              |               |              | 7/8/2021 10:12:20 AM (UTC+08:00) |

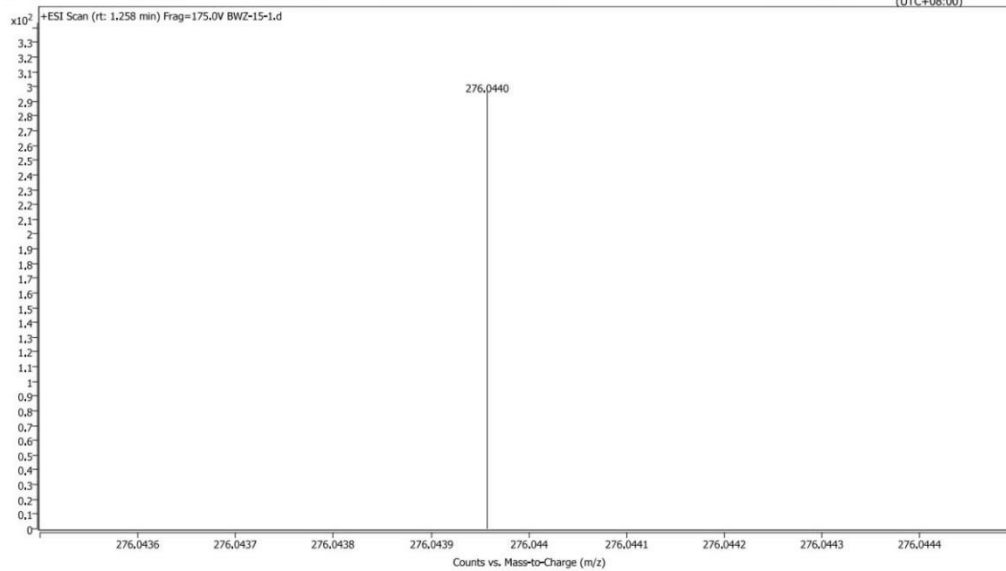

HRMS spectrum of compound **3r**

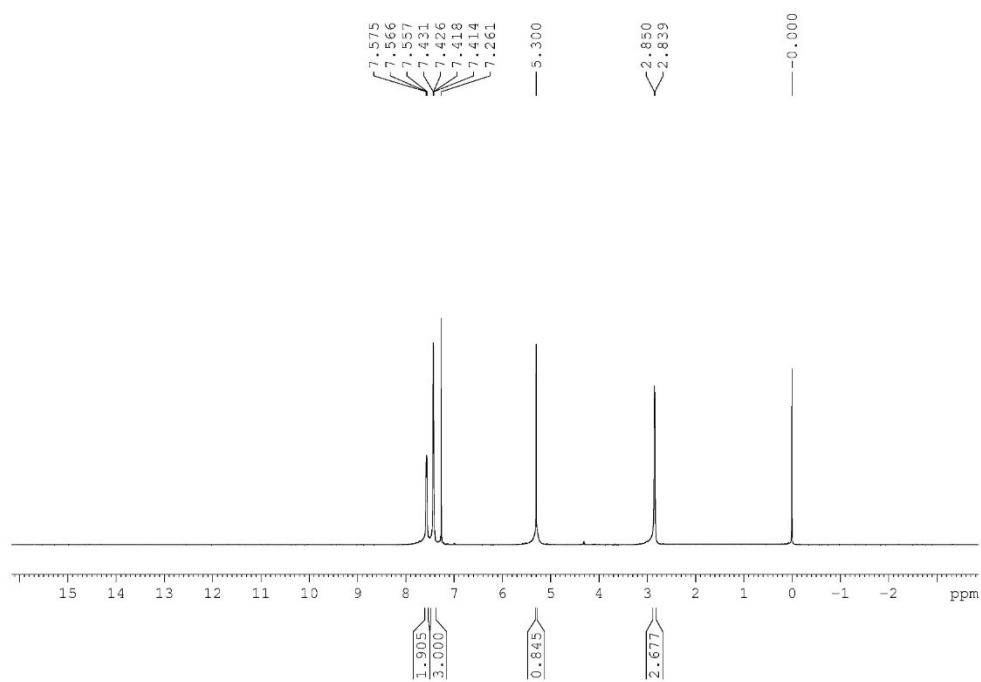

$^1\text{H}$  NMR spectrum of compound **5a**

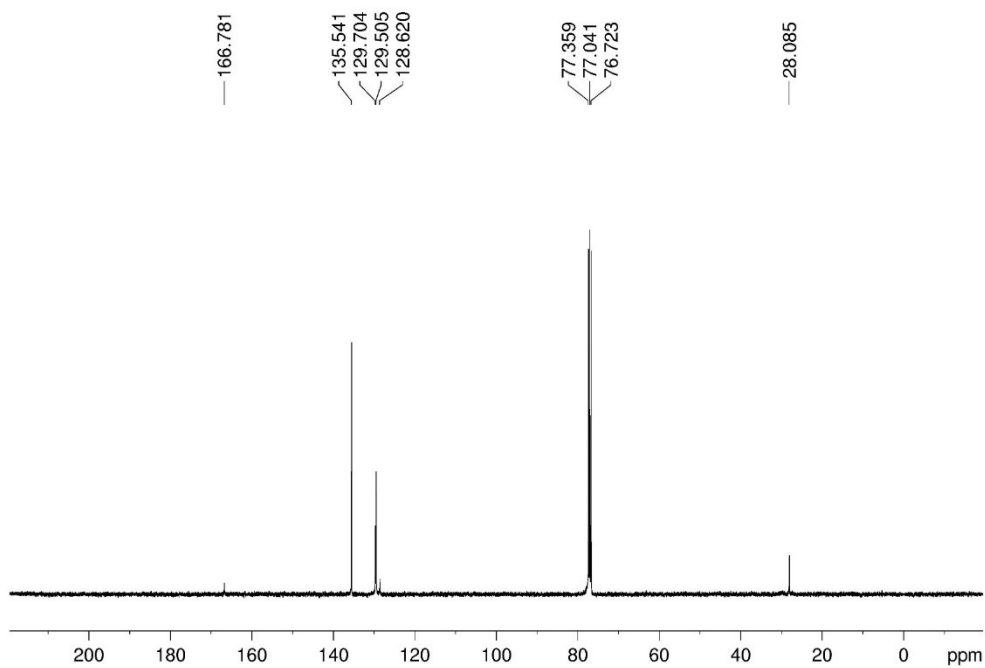

$^{13}\text{C}$  NMR spectrum of compound **5a**

# Spectrum Plot Report

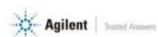

|                |          |              |                                 |              |                                    |
|----------------|----------|--------------|---------------------------------|--------------|------------------------------------|
| Name           | BWZ-18   | Rack Pos.    | Instrument                      | Instrument 1 | Operator                           |
| Inj. Vol. (ul) | 5        | Plate Pos.   | IRM Status                      | Success      |                                    |
| Data File      | BWZ-18.d | Method (Acq) | Comment                         |              | Acq. Time (Local)                  |
|                |          |              | BWZ20210707-<br>0.15eHAc-1min.m |              | 7/7/2021 3:07:58 PM<br>(UTC+08:00) |

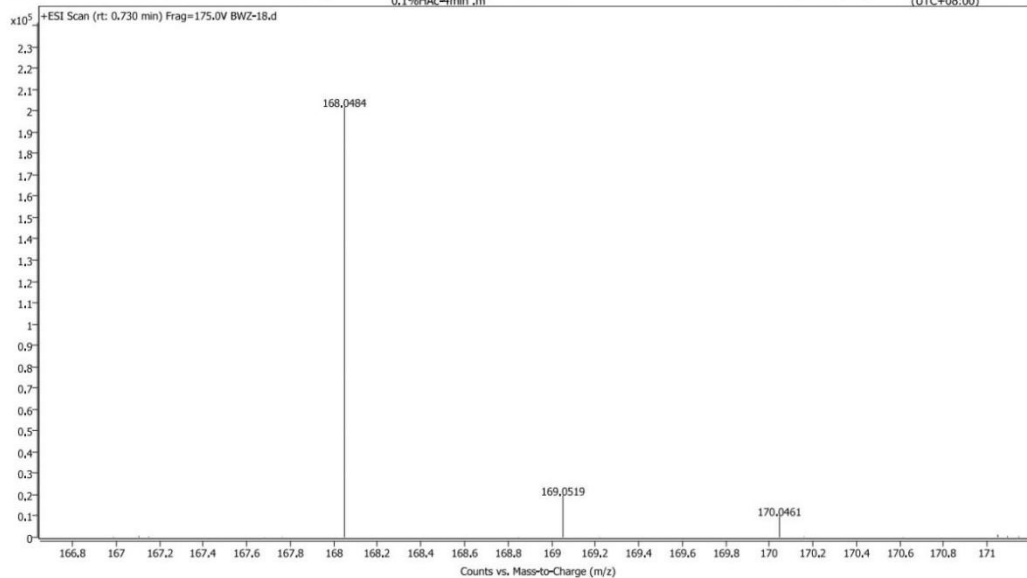

HRMS spectrum of compound **5a**



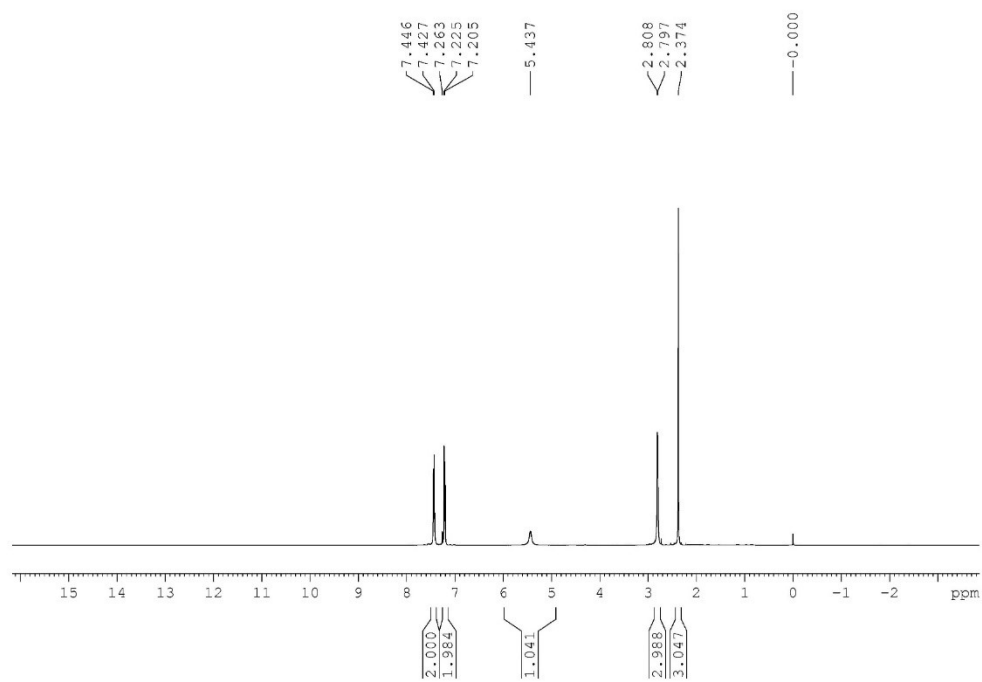

$^1\text{H}$  NMR spectrum of compound **5b**

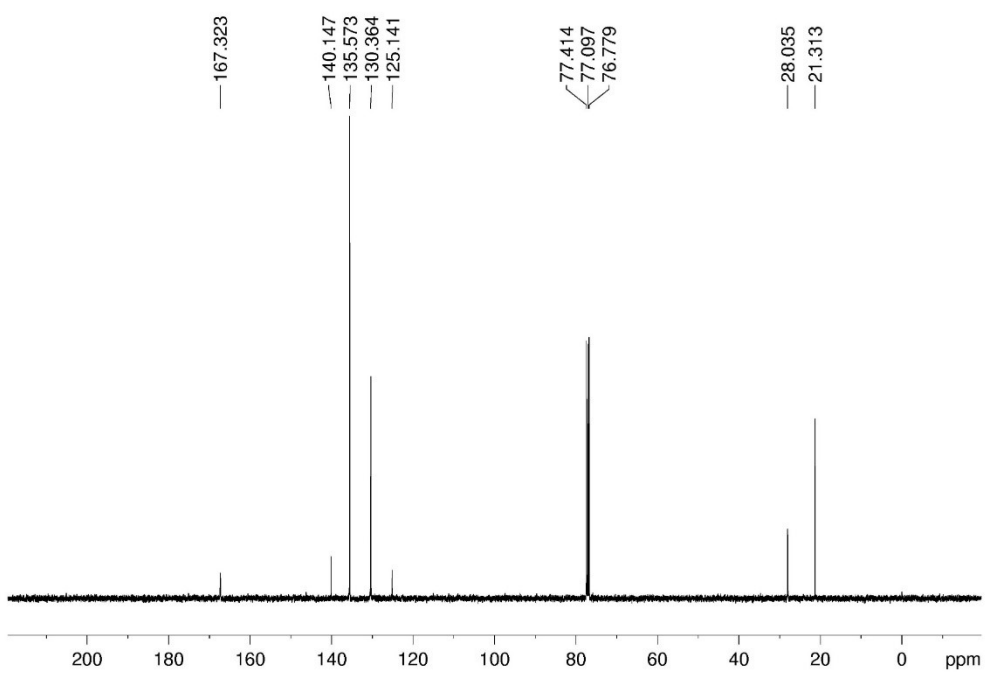

$^{13}\text{C}$  NMR spectrum of compound **5b**

# Spectrum Plot Report

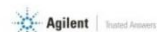

|                |          |                                     |            |              |                                 |
|----------------|----------|-------------------------------------|------------|--------------|---------------------------------|
| Name           | BWZ-19   | Rack Pos.                           | Instrument | Instrument 1 | Operator                        |
| Inj. Vol. (µl) | 5        | Plate Pos.                          | IRM Status | Success      |                                 |
| Data File      | BWZ-19.d | Method (Acq)                        | Comment    |              | Acq. Time (Local)               |
|                |          | BWZ20210707-0,1% <i>HAc</i> -1min.m |            |              | 7/7/2021 3:16:46 PM (UTC+08:00) |

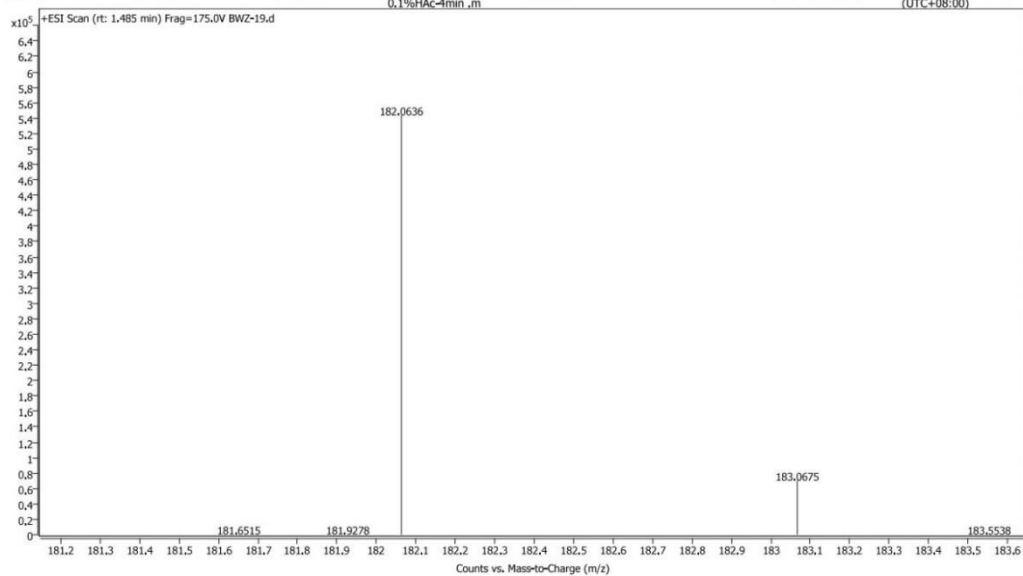

HRMS spectrum of compound **5b**

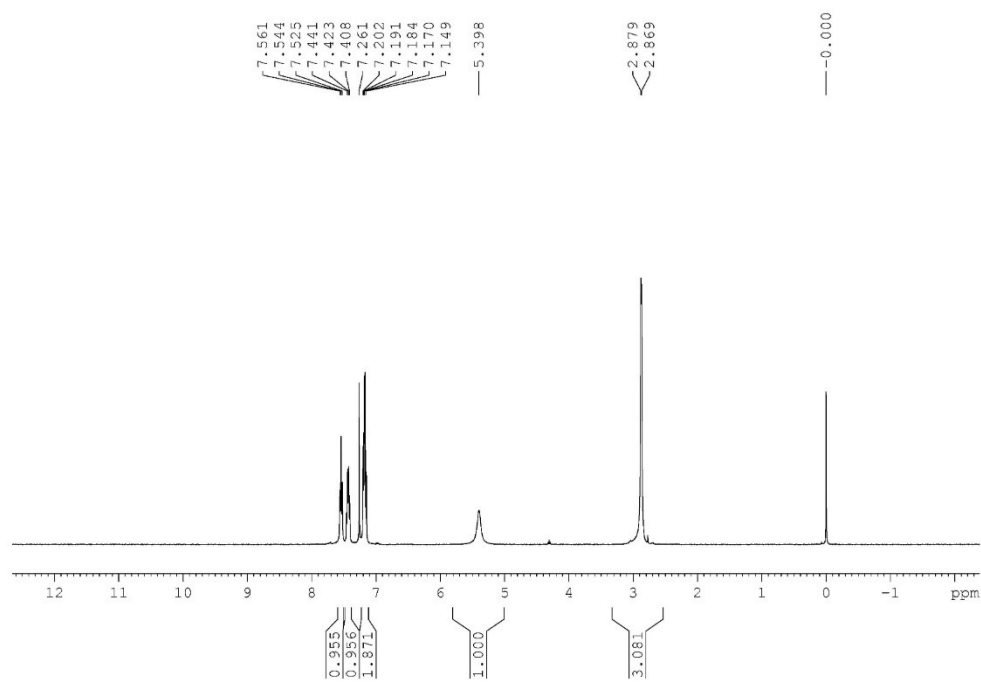

$^1\text{H}$  NMR spectrum of compound **5c**

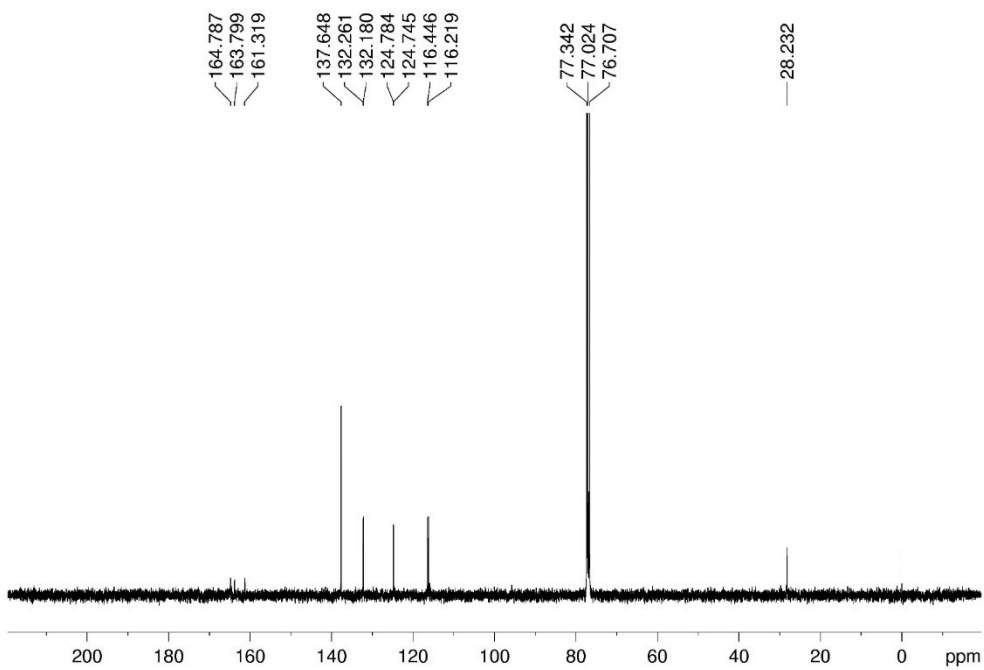

$^{13}\text{C}$  NMR spectrum of compound **5c**

# Spectrum Plot Report

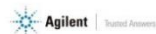

|                |          |              |                                               |              |                                    |
|----------------|----------|--------------|-----------------------------------------------|--------------|------------------------------------|
| Name           | BWZ-20   | Rack Pos.    | Instrument                                    | Instrument 1 | Operator                           |
| Inj. Vol. (ul) | 5        | Plate Pos.   | IRM Status                                    | Success      |                                    |
| Data File      | BWZ-20.d | Method (Acq) | Comment                                       |              | Acq. Time (Local)                  |
|                |          |              | BWZ20210707-<br>0.1% <sup>14</sup> Ac-tmin .m |              | 7/7/2021 3:24:40 PM<br>(UTC+08:00) |

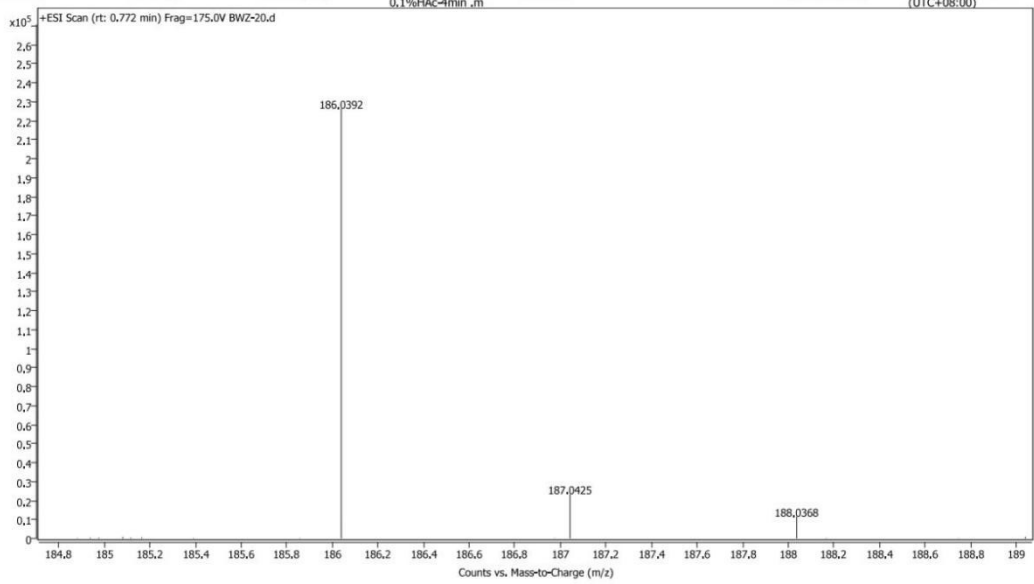

HRMS spectrum of compound **5c**

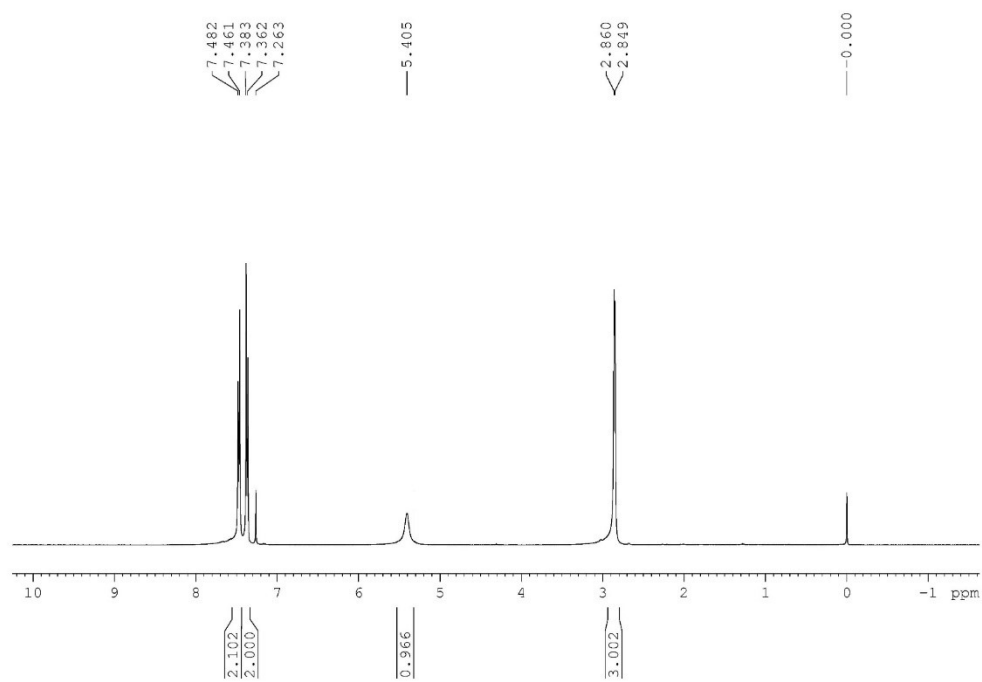

$^1\text{H}$  NMR spectrum of compound **5d**

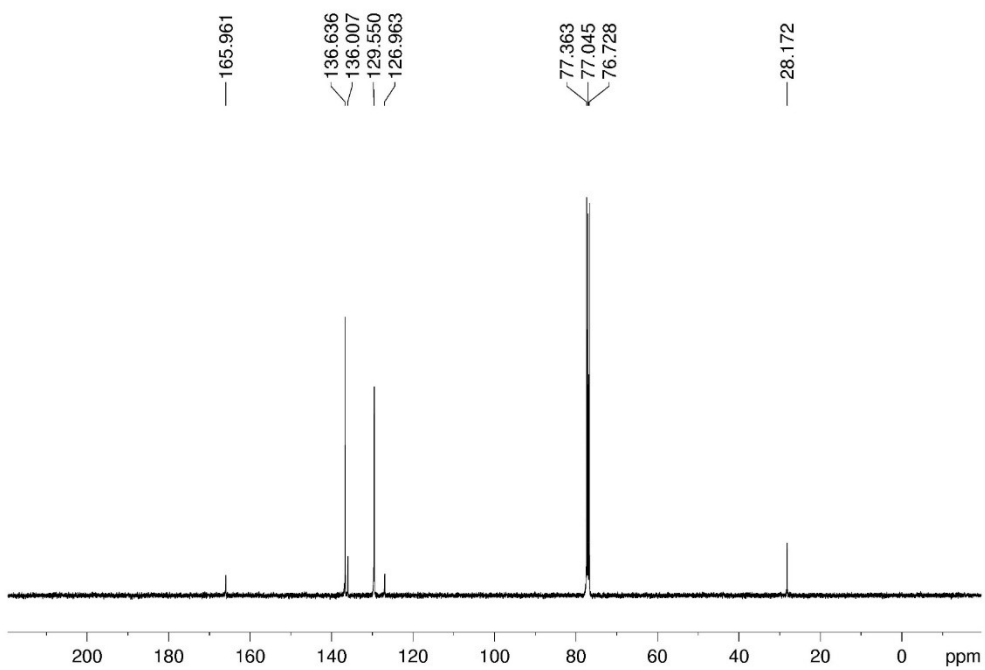

$^{13}\text{C}$  NMR spectrum of compound **5d**

# Spectrum Plot Report

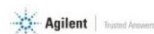

|                |          |                                                |            |              |                                 |
|----------------|----------|------------------------------------------------|------------|--------------|---------------------------------|
| Name           | BWZ-21   | Rack Pos.                                      | Instrument | Instrument 1 | Operator                        |
| Inj. Vol. (µl) | 5        | Plate Pos.                                     | IRM Status | Success      |                                 |
| Data File      | BWZ-21.d | Method (Acq)                                   | Comment    |              | Acq. Time (Local)               |
|                |          | BWZ20210707-0.1% <i>i</i> HAc- <i>t</i> min .m |            |              | 7/7/2021 3:30:09 PM (UTC+08:00) |

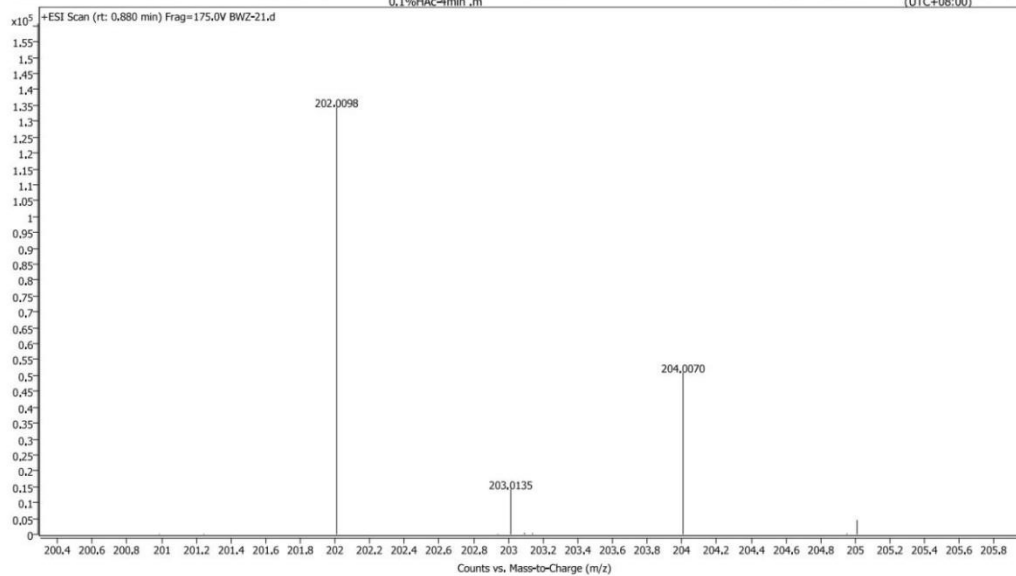

HRMS spectrum of compound **5d**

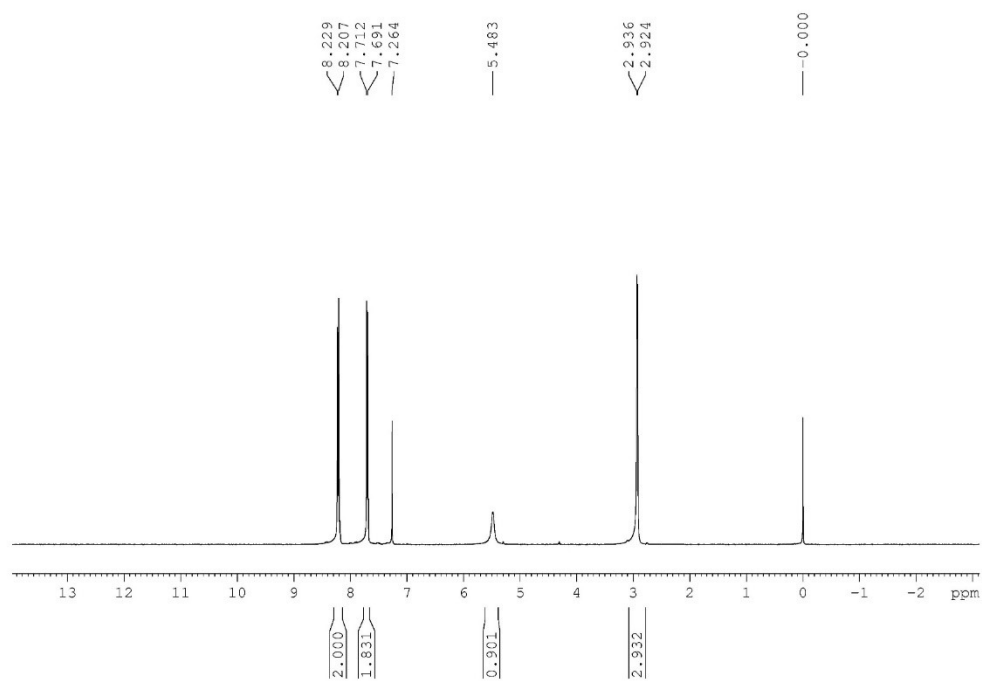

$^1\text{H}$  NMR spectrum of compound **5e**

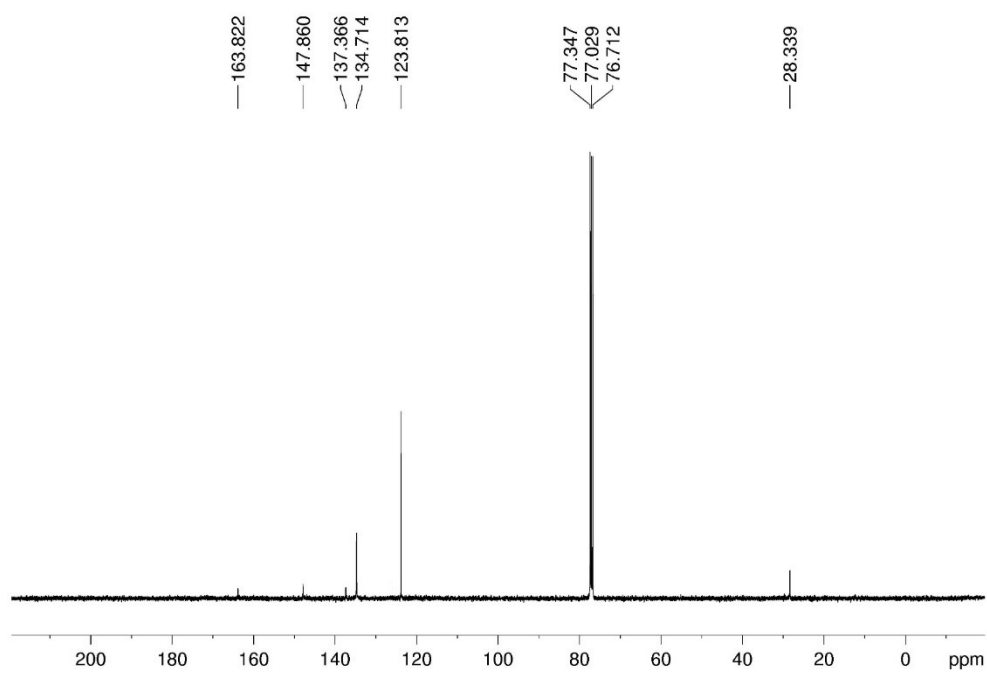

$^{13}\text{C}$  NMR spectrum of compound **5e**

# Spectrum Plot Report

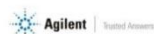

|                |            |              |               |              |                                  |
|----------------|------------|--------------|---------------|--------------|----------------------------------|
| Name           | BWZ-22-1   | Rack Pos.    | Instrument    | Instrument 1 | Operator                         |
| Inj. Vol. (µl) | 5          | Plate Pos.   | IRM Status    | Success      |                                  |
| Data File      | BWZ-22-1.d | Method (Acq) | LZH20210707.m | Comment      | Acq. Time (Local)                |
|                |            |              |               |              | 7/8/2021 10:19:16 AM (UTC+08:00) |

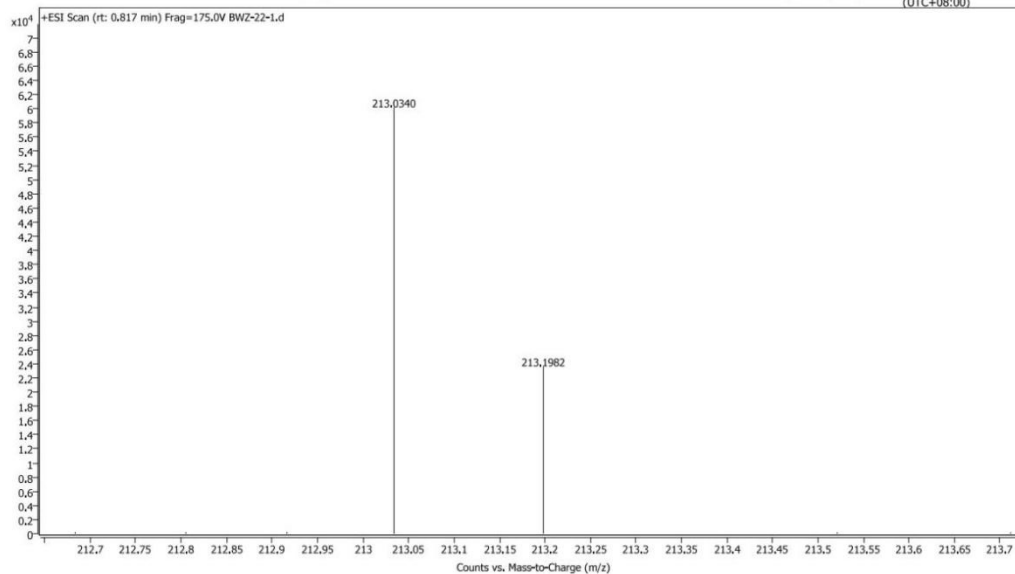

HRMS spectrum of compound **5e**



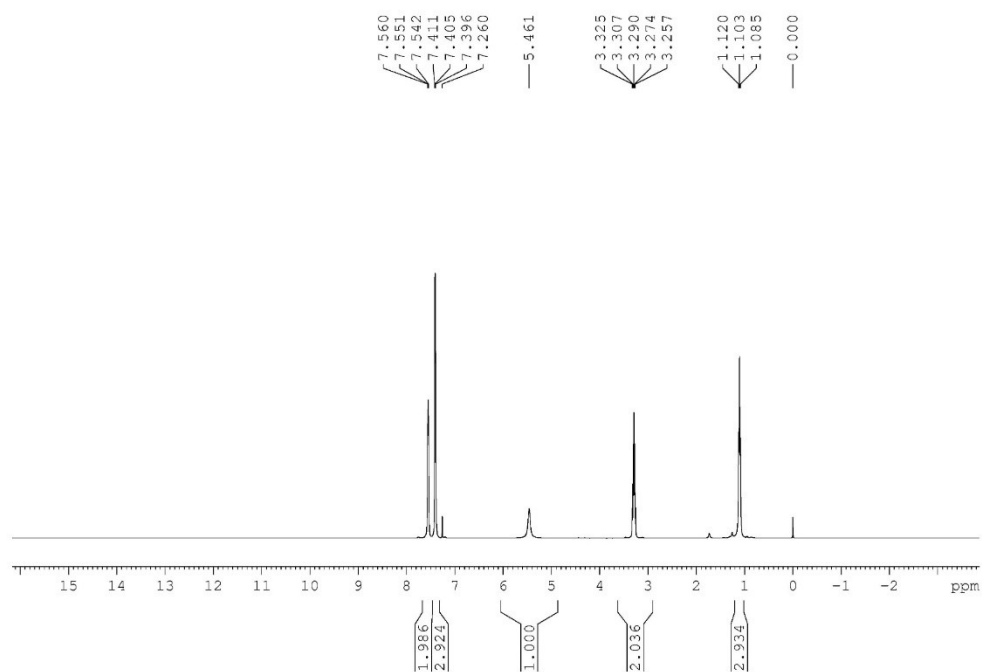

$^1\text{H}$  NMR spectrum of compound **5f**

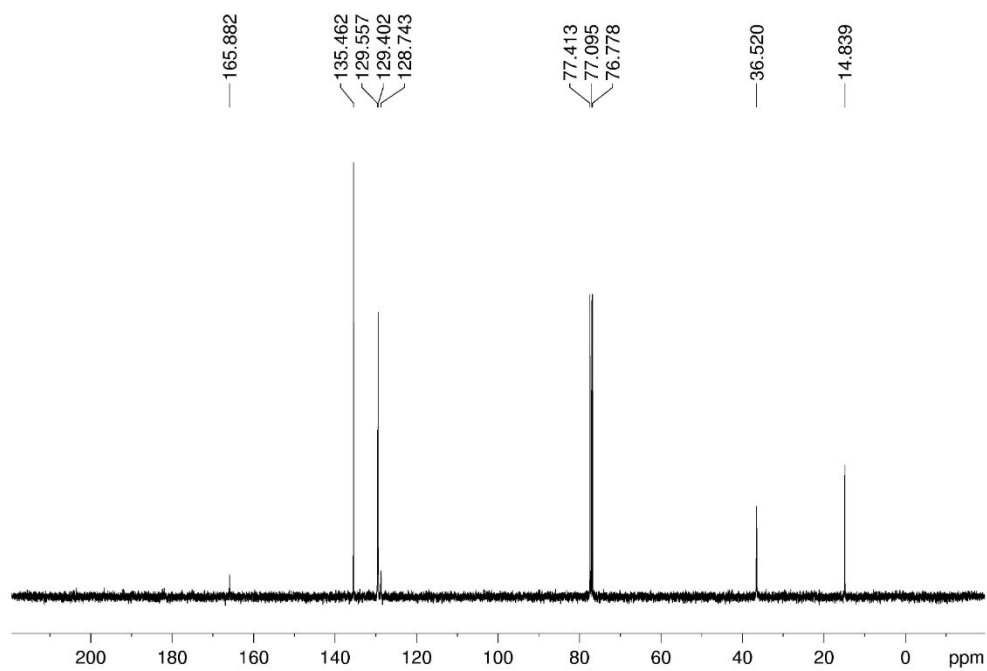

$^{13}\text{C}$  NMR spectrum of compound **5f**

# Spectrum Plot Report

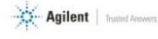

|                |          |              |                                     |              |                                 |
|----------------|----------|--------------|-------------------------------------|--------------|---------------------------------|
| Name           | BWZ-23   | Rack Pos.    | Instrument                          | Instrument 1 | Operator                        |
| Inj. Vol. (µl) | 5        | Plate Pos.   | IRM Status                          | Success      |                                 |
| Data File      | BWZ-23.d | Method (Acq) | Comment                             |              | Acq. Time (Local)               |
|                |          |              | BWZ20210707-0.1% <i>HAc</i> -4min.m |              | 7/7/2021 3:43:15 PM (UTC+08:00) |

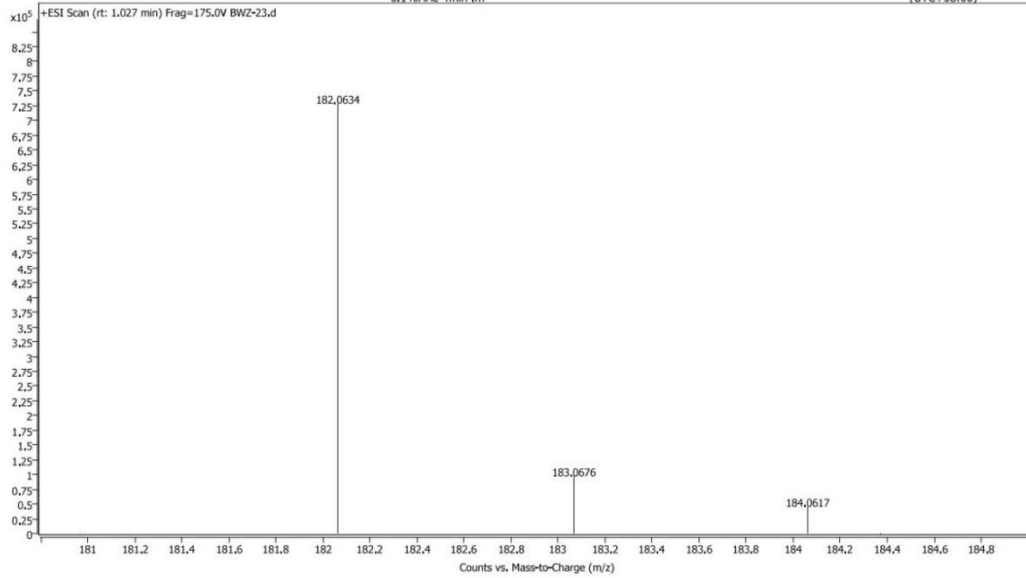

HRMS spectrum of compound **5f**

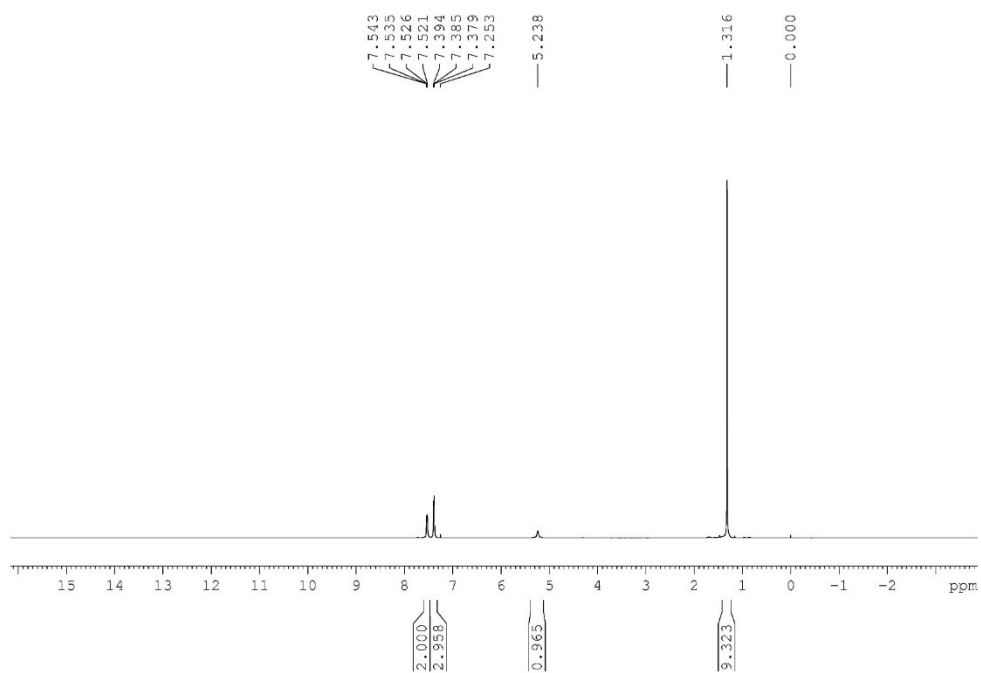

$^1\text{H}$  NMR spectrum of compound **5g**

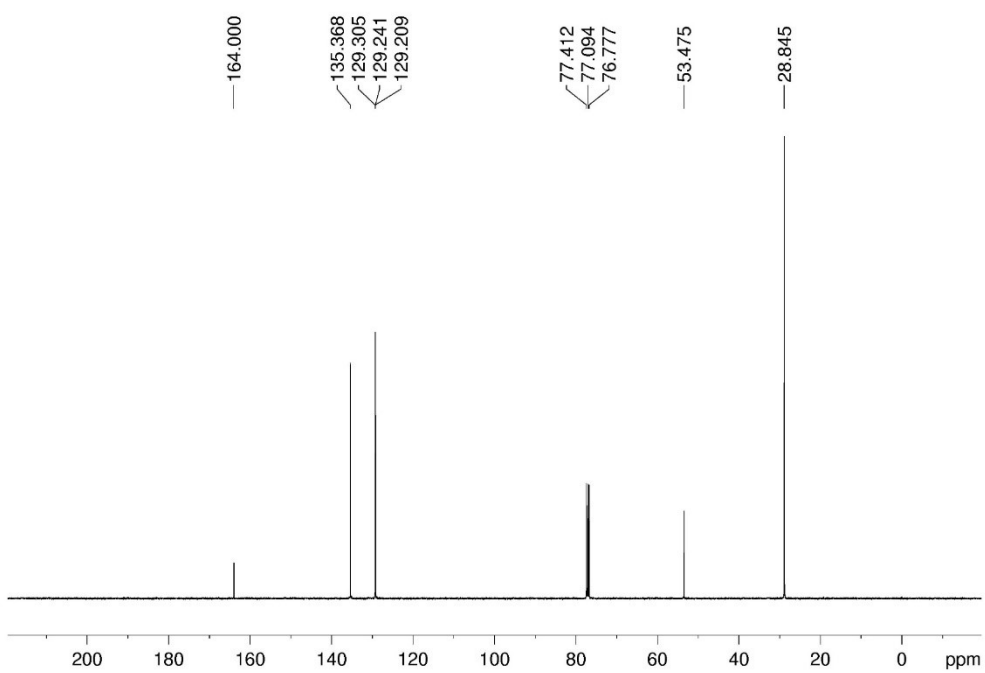

$^{13}\text{C}$  NMR spectrum of compound **5g**

# Spectrum Plot Report

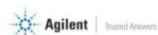

|                |          |              |            |                   |                                 |
|----------------|----------|--------------|------------|-------------------|---------------------------------|
| Name           | BWZ-24   | Rack Pos.    | Instrument | Instrument 1      | Operator                        |
| Inj. Vol. (ul) | 5        | Plate Pos.   | IRM Status | Success           |                                 |
| Data File      | BWZ-24.d | Method (Acq) | Comment    | Acq. Time (Local) | 7/7/2021 3:51:54 PM (UTC+08:00) |

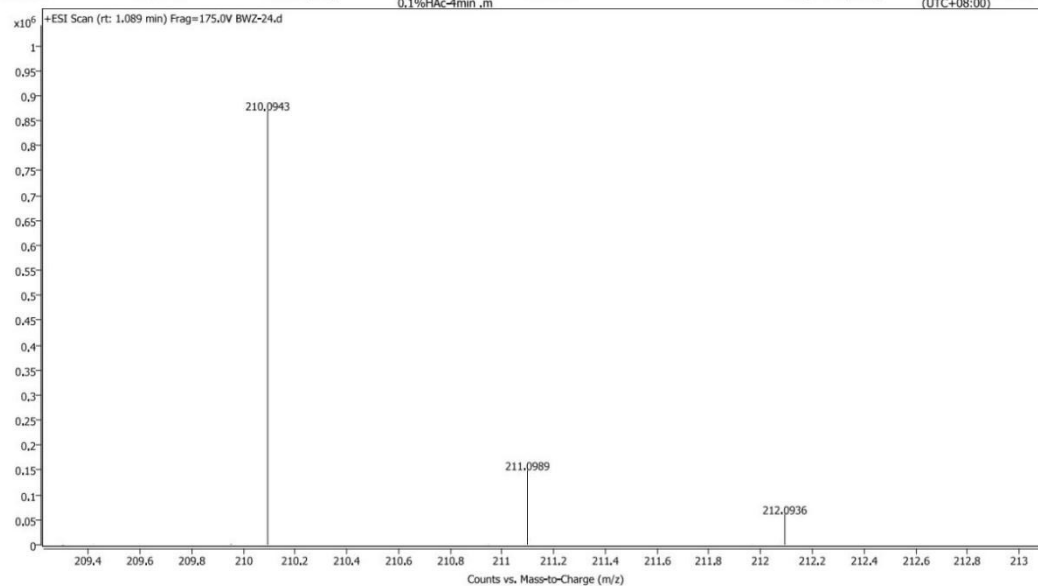

HRMS spectrum of compound **5g**

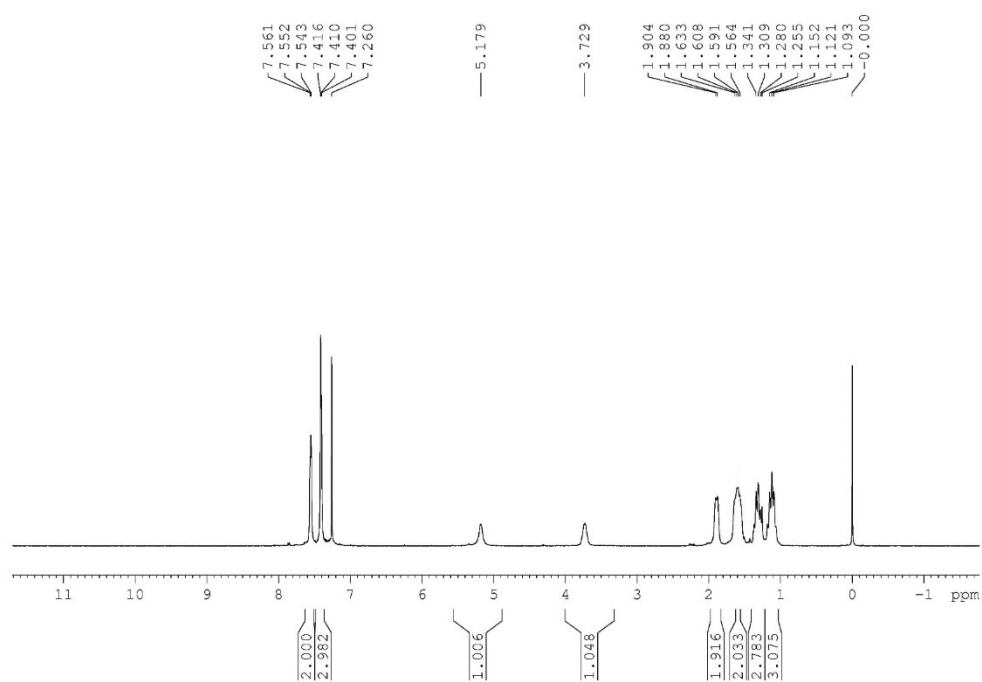

$^1\text{H}$  NMR spectrum of compound **5h**

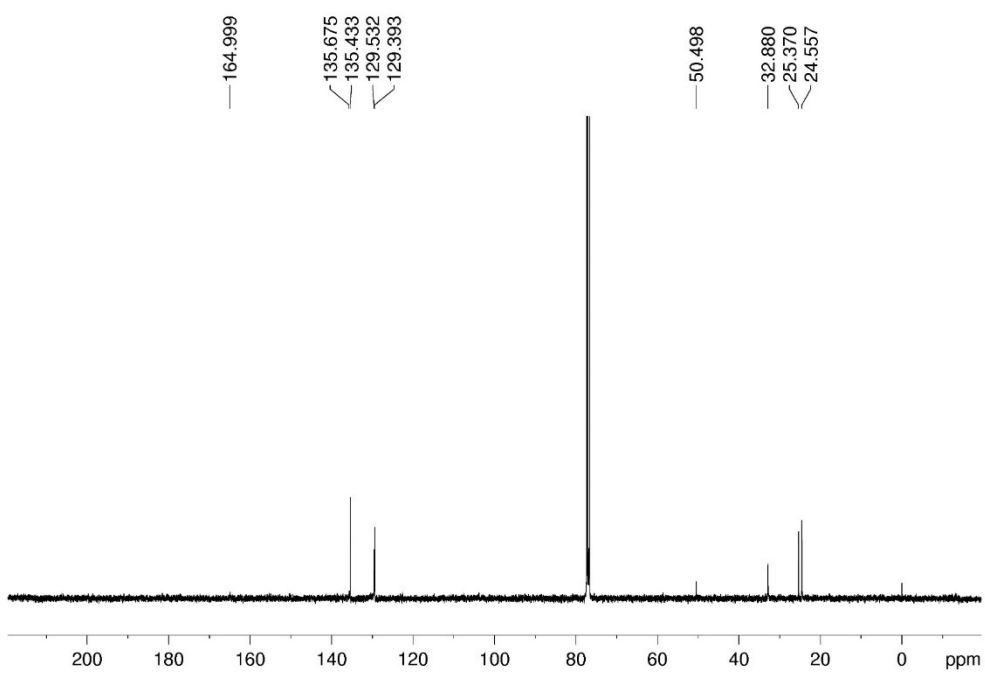

$^{13}\text{C}$  NMR spectrum of compound **5h**

# Spectrum Plot Report

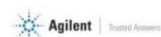

|                |          |              |                            |              |                                 |
|----------------|----------|--------------|----------------------------|--------------|---------------------------------|
| Name           | BWZ-25   | Rack Pos.    | Instrument                 | Instrument 1 | Operator                        |
| Inj. Vol. (µl) | 5        | Plate Pos.   | IRM Status                 | Success      |                                 |
| Data File      | BWZ-25.d | Method (Acq) | Comment                    |              | Acq. Time (Local)               |
|                |          |              | BWZ20210707-0.1%IAC-1min.m |              | 7/7/2021 3:57:05 PM (UTC+08:00) |

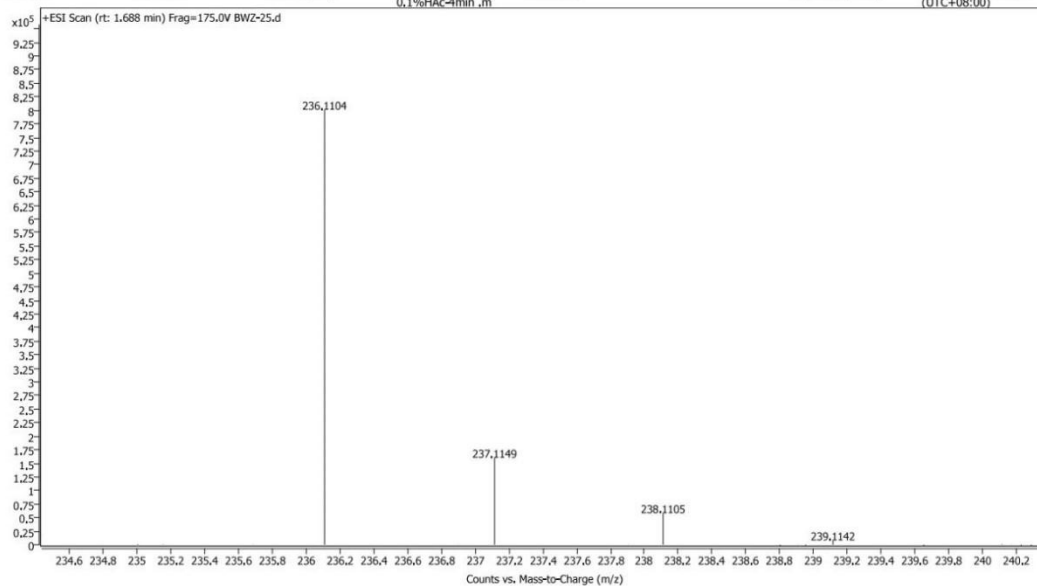

HRMS spectrum of compound **5h**

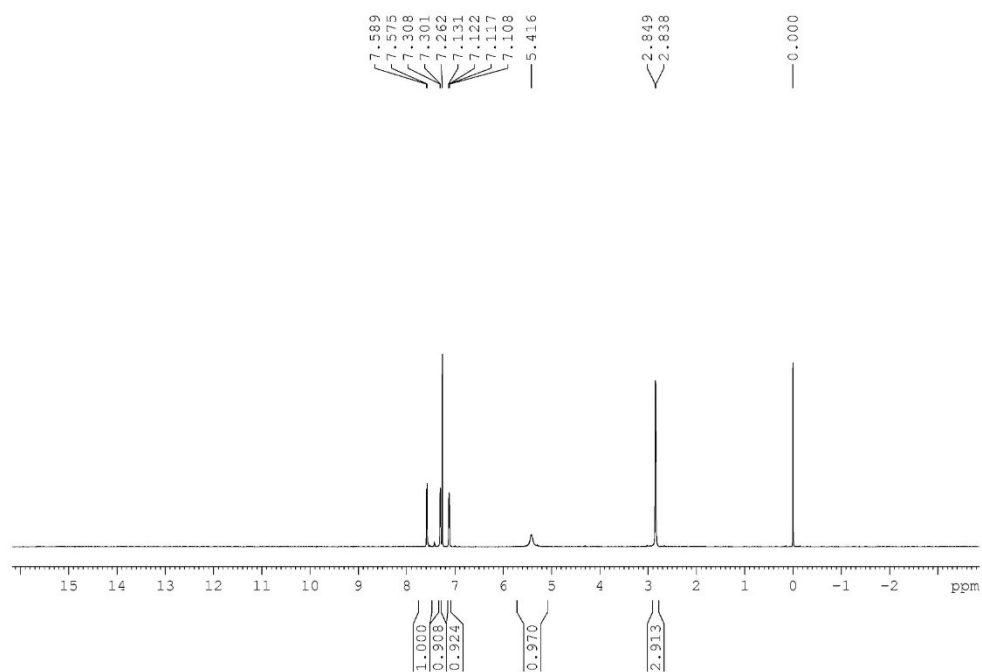

$^1\text{H}$  NMR spectrum of compound **5i**

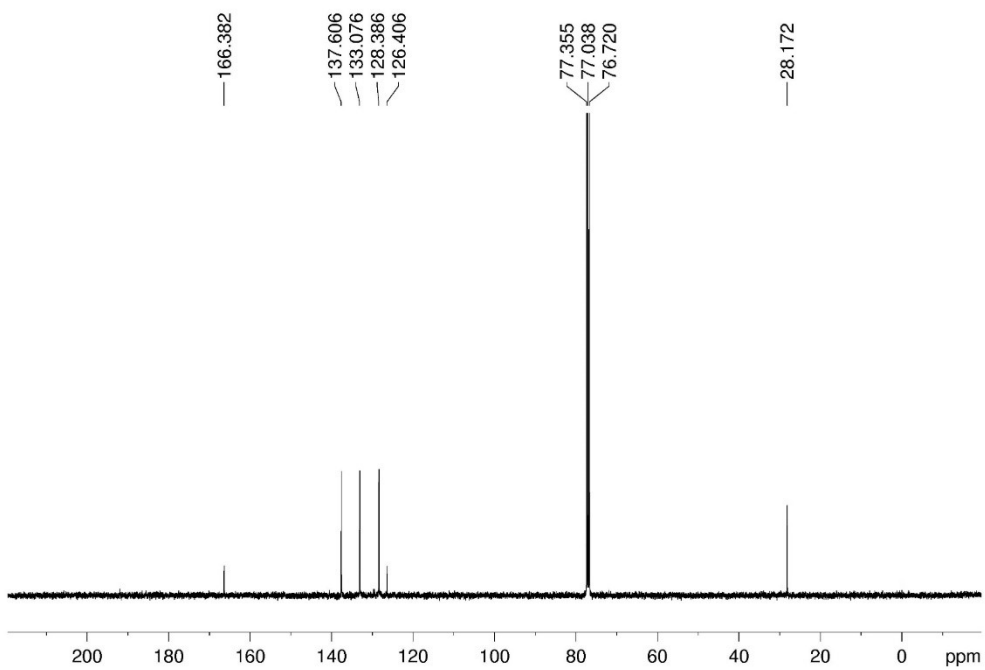

$^{13}\text{C}$  NMR spectrum of compound **5i**

# Spectrum Plot Report

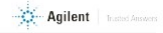

Name: BWZ-26-method2-4 min Rack Pos.  
Inj. Vol. (ul): 5 Plate Pos.  
Data File: BWZ-26-method2-4 min.d Method (Acq): BWZ20210707-0.1%  
HAC-4min.m Instrument: Instrument 1  
IRM Status: Success  
Comment: Operator: 7/7/2021 12:41:28 PM (UTC+08:00)  
Acq. Time (Local):

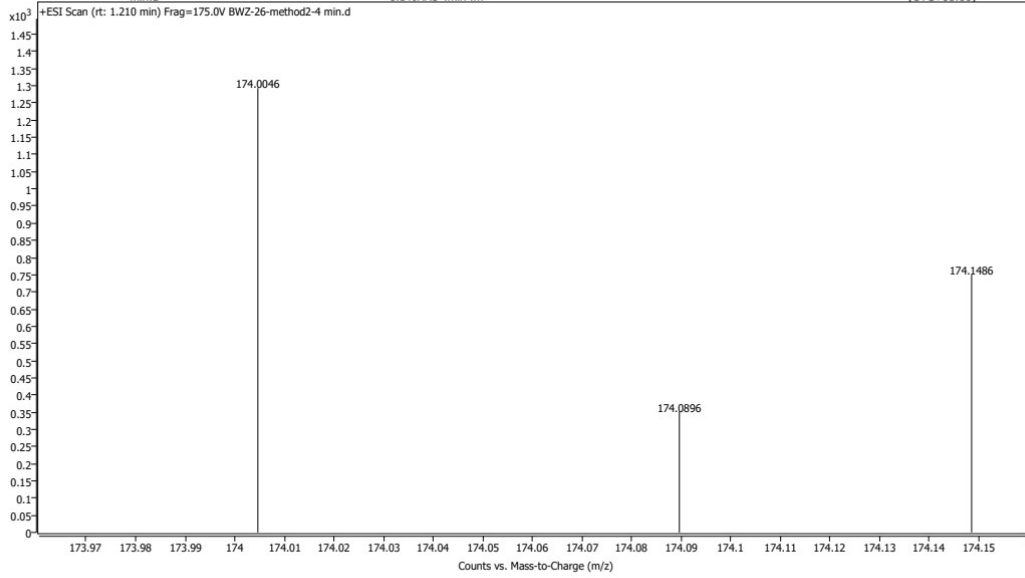

HRMS spectrum of compound **5i**

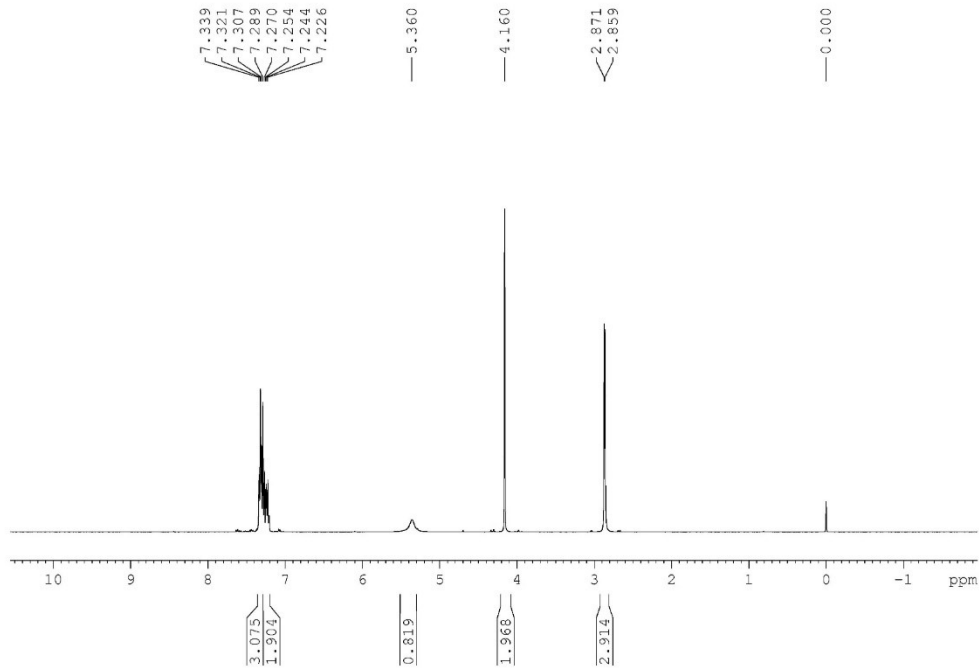

<sup>1</sup>H NMR spectrum of compound **5j**



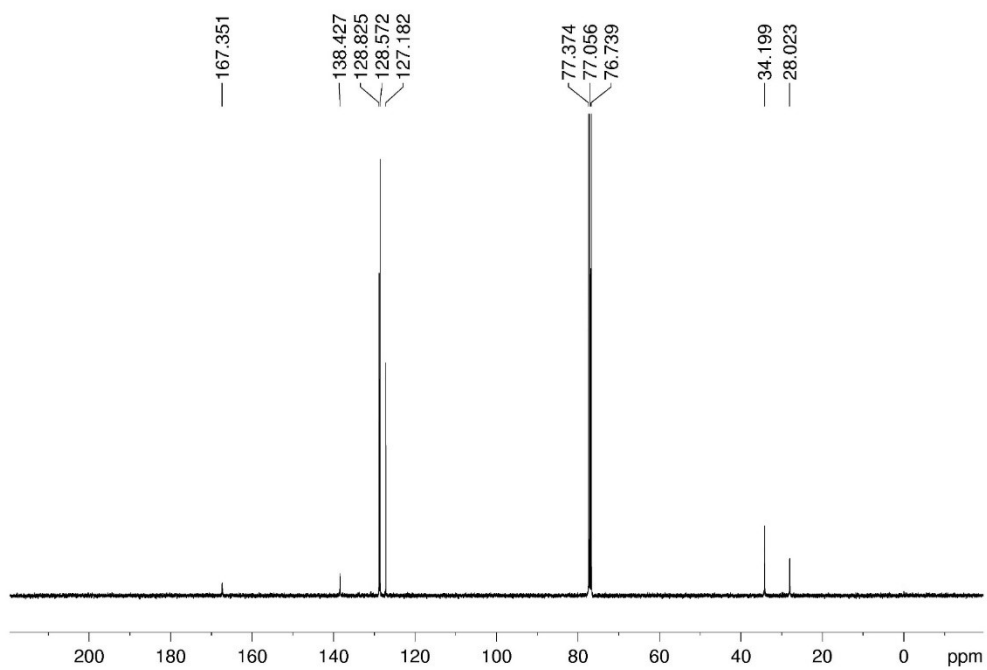

<sup>13</sup>C NMR spectrum of compound **5j**

# Spectrum Plot Report

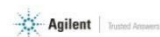

|                |          |              |            |              |                   |
|----------------|----------|--------------|------------|--------------|-------------------|
| Name           | BWZ-27   | Rack Pos.    | Instrument | Instrument 1 | Operator          |
| Inj. Vol. (ul) | 5        | Plate Pos.   | IRM Status | Success      |                   |
| Data File      | BWZ-27.d | Method (Acq) | Comment    |              | Acq. Time (Local) |

BWZ20210707-0.1%IAC-1min.m

7/7/2021 4:04:10 PM (UTC+08:00)

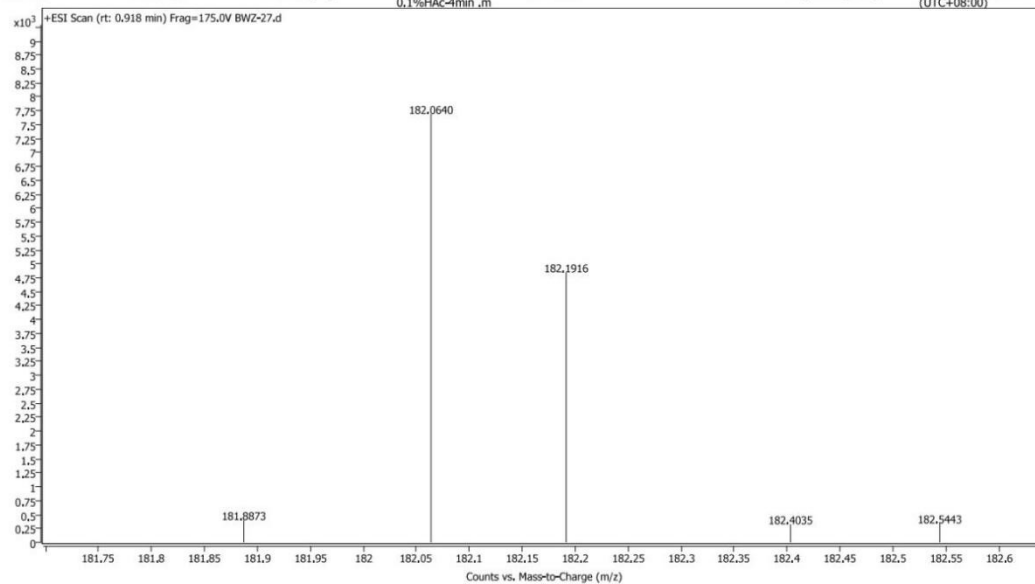

HRMS spectrum of compound **5j**
